# Supplementary material for: Do the shuffle: Exploring reasons for music listening through shuffled play
Source: PubMed Central journal article supplement (PMC7004375; doi:10.1371/journal.pone.0228457), 2020-02-06
Supplement: pone.0228457.s002.pdf [file pone.0228457.s002.pdf]

| Level 1 Codes | Level 2 Codes | Level 3 codes | Defintion                                                                                                                         | Example                                                                                                                 |
|---------------|---------------|---------------|-----------------------------------------------------------------------------------------------------------------------------------|-------------------------------------------------------------------------------------------------------------------------|
| Association   |               |               | When the respondent describes or talks about the track by relating it something or someone outside of just the track/music itself |                                                                                                                         |
|               | Activity      |               | When the respondent describes or talks about the track in relation to its use during an activity. When it accompanies...          |                                                                                                                         |
|               |               | Accompaniment | ... something not covered in the other code or as background music                                                                | <b>"background piece of music"</b>                                                                                      |
|               |               | Dancing       | ... dancing                                                                                                                       | "Because it is a song myself and my friends like <i>to dance to.</i> "                                                  |
|               |               | Driving       | ... driving                                                                                                                       | <b>"Driving too fast"</b>                                                                                               |
|               |               | Exercising    | ... exercising                                                                                                                    | <b>"So <i>I can run to it</i>"</b>                                                                                      |
|               |               | Partying      | ...partying or going out                                                                                                          | <b>"<i>Can party to it</i> but also listen to at work, multifunctional"</b>                                             |
|               |               | Singing       | ... singing                                                                                                                       | "This doesn't make anyone else happy as I can't sing in tune, but <b><i>I love to sing this song really loud!</i></b> " |
|               |               | Sleeping      | ... sleeping                                                                                                                      | "I enjoy calm solo piano music to either read or <b><i>sleep to</i></b> "                                               |
|               |               | Walking       | ... walking                                                                                                                       | <b>"<i>Strutting down the street.</i>"</b>                                                                              |
|               |               | Working       | ... working,. reading, housework                                                                                                  | "Good background music to just put on shuffle while I am busy or <b><i>working</i></b> "                                |

|  |             |                            |                                                                                                                                                                                                                        |                                                                                                                                                                                                                       |
|--|-------------|----------------------------|------------------------------------------------------------------------------------------------------------------------------------------------------------------------------------------------------------------------|-----------------------------------------------------------------------------------------------------------------------------------------------------------------------------------------------------------------------|
|  | Imagination |                            | When the respondent describes the track through a descriptive narrative or is associated with a season, or time that isn't about a specific memory. When they associate the piece with an image or narrative about ... |                                                                                                                                                                                                                       |
|  |             | Christmas                  | ...Christmas                                                                                                                                                                                                           | "Warm feelings, memories of my youth, <b>Christmas feeling</b> "                                                                                                                                                      |
|  |             | Imagination                | ... something not covered in the other codes, a narrative or story                                                                                                                                                     | <b>"A solitary lonely man playing beautiful music for people"</b>                                                                                                                                                     |
|  |             | Summer                     | ... summer season                                                                                                                                                                                                      | <b>"Summer</b> and sunny days"                                                                                                                                                                                        |
|  |             | Season/Time of Day/Weather | ... a time of day, season or weather                                                                                                                                                                                   | "Old movies and <b>winter</b> "                                                                                                                                                                                       |
|  | Memory      |                            | When the respondent associates the track with ...                                                                                                                                                                      |                                                                                                                                                                                                                       |
|  |             | Event/Concert              | ... the memory of a specific event, concert, performance or festival.                                                                                                                                                  | The track makes me think of a <b>great night when I saw All Time Low, Good Charlotte and Against the Current in Birmingham</b> with my brother, the weekend when he visited from uni and before I loved to Lancashire |
|  |             | Discovery                  | ... the memory or discovering the track for the first time                                                                                                                                                             | <b><i>"It comes to my mind the first day when I heard the song and decided to save it"</i></b>                                                                                                                        |
|  |             | Emotion                    | ... the memory of an emotion or feeling.                                                                                                                                                                               | <b><i>"It reminds me</i></b> of being away at school and <b><i>feeling lonely</i></b>                                                                                                                                 |

|  |                   |                       |                                                                                            |                                                                                           |
|--|-------------------|-----------------------|--------------------------------------------------------------------------------------------|-------------------------------------------------------------------------------------------|
|  |                   |                       |                                                                                            | <i>and helpless"</i>                                                                      |
|  |                   | Gift/Recommendation   | ... a memory of being given it as a gift or as a recommendation not from a specific person | <i>"It is part of a compilation CD which I was given as a gift"</i>                       |
|  |                   | Memory                | ... general memories                                                                       | "This song <i>brings back good memories</i> and the message is a good one."               |
|  |                   | Personal Event        | ... the memory of a specific personal life event.                                          | <b>"Training at EE"</b>                                                                   |
|  |                   | Personal Performance  | ... the memory of their personal performance or learning of the track                      | <i>"I have previously performed this piece (as an orchestral leader and alto singer)"</i> |
|  |                   | Place                 | ... the memory of a specific place or type of place the music was played.                  | "It reminds me of some drunken nights <i>in our old flat</i> "                            |
|  |                   | Rediscovery           | ... the feeling of rediscovery and remembering the track or the last time they heard it.   | "Good song, <i>haven't heard it for a while!</i> "                                        |
|  |                   | Reminisce/Nostalgia   | ... general nostalgia or reminisce                                                         | <b>"the song make me Reminisce about life"</b>                                            |
|  |                   | Time or Stage in Life | ... a memory of a specific time or stage in their life                                     | <i>"Reminds me of being young"</i>                                                        |
|  |                   | Vacation              | ... a memory of a vacation                                                                 | <b>"Reminds me of an amazing ski trip"</b>                                                |
|  | Other Media Forms |                       | When the respondent associates the track with another form of media such as...             |                                                                                           |
|  |                   | Film                  | ... a film                                                                                 | <b>"The film La La Land"</b>                                                              |

|  |        |                      |                                                                   |                                                                                                                                      |
|--|--------|----------------------|-------------------------------------------------------------------|--------------------------------------------------------------------------------------------------------------------------------------|
|  |        | Music Video          | ... a music video                                                 | <i>"I did think of its brilliantly directed and acted music video quite a lot after watching it as it is quite a powerful video"</i> |
|  |        | Musical              | ... a musical                                                     | <i>"I have been to see the musical which it is from (Phantom of the Opera) and so bought the soundtrack"</i>                         |
|  |        | Other Forms of Media | ... another other form of media not covered by the other codes    | <i>"The Snap chat filter"</i>                                                                                                        |
|  |        | Playlist             | ... a specific playlist                                           | <i>"It's not my favourite <b>from the playlist</b>, but I definitely enjoyed listening to it"</i>                                    |
|  |        | Television           | ... a television show                                             | <i>"I grew up in the 80s so it reminds me of when I was first discovering music (<b>and MTV</b>)."</i>                               |
|  | Person |                      | When the respondent associates the track with a person such as... |                                                                                                                                      |
|  |        | Being alone          | ... not being with a person or being alone                        | <i>"lonely times"</i>                                                                                                                |
|  |        | Family               | ... a family member                                               | <i>"My daughter singing in the car"</i>                                                                                              |
|  |        | Friends              | ... a friend                                                      | <i>"It brought back funny memories <b>with me friends</b>"</i>                                                                       |
|  |        | Loss of a Person     | ... the loss of a person                                          | <i>"It was a song from a list I made <b>to remember my Dad.</b>"</i>                                                                 |
|  |        | People               | ... a group of people                                             | <i>"It reminds me of <b>a fun crowd</b>, sun and fun"</i>                                                                            |

|                 |                  |                                   |                                                                                                                                                              |                                                                                                                                                                  |
|-----------------|------------------|-----------------------------------|--------------------------------------------------------------------------------------------------------------------------------------------------------------|------------------------------------------------------------------------------------------------------------------------------------------------------------------|
|                 |                  | Recommendation from Family/Friend | ... a family member who recommended the track                                                                                                                | <b>"Recommended by family member"</b>                                                                                                                            |
|                 |                  | Romantic Relationship             | ... a person they are or were in a romantic relationship with                                                                                                | <b>"Reminds me of my boyfriend when he's away from me"</b>                                                                                                       |
|                 | Track Identifier |                                   | When the respondent associates the track with the informational context around the track like ...                                                            |                                                                                                                                                                  |
|                 |                  | Album                             | ... the album it is on                                                                                                                                       | <b>"I have all of The Beatles' albums saved because they're obviously amazing."</b>                                                                              |
|                 |                  | Artist                            | ... the artist who created the track                                                                                                                         | <b>"Like the artist and their music"</b>                                                                                                                         |
|                 |                  | Era                               | ... the era the track is from                                                                                                                                | <b>"Similar reason - a style and era of music I like and find relaxing and not too challenging"</b>                                                              |
|                 |                  | Genre                             | ... the genre of the track                                                                                                                                   | <b>"Yes. I bought this album when I was just becoming familiar with the metal genre"</b>                                                                         |
|                 |                  | Version                           | ... a version of the track                                                                                                                                   | <b>"This song has been on my laptop for a long time because at some point I wanted to listen to more Herman Brood after I had heard his version of "My Way."</b> |
| Characteristics |                  |                                   | When the respondent describes or talks about the track by characterising it by how it sounds using expressive adjectives or by describing the more technical |                                                                                                                                                                  |

|  |                           |                                    |                                                                                                 |                                                                                                                   |
|--|---------------------------|------------------------------------|-------------------------------------------------------------------------------------------------|-------------------------------------------------------------------------------------------------------------------|
|  |                           |                                    | aspects of the track.                                                                           |                                                                                                                   |
|  | Lyrics                    |                                    | When the respondent talks about the track by mentioning or describing ...                       |                                                                                                                   |
|  |                           | Lyrics                             | ... the lyrics                                                                                  | "I enjoy the <i>lyrics</i> ."                                                                                     |
|  |                           | Lyrical Meaning                    | ... the meaning behind the lyrics                                                               | "It has a cool <i>meaning behind the lyrics</i> "                                                                 |
|  | Musical Expressive        |                                    | When the respondent describes or talks about the track by characterising it or describing it... |                                                                                                                   |
|  |                           | Musical Expressive Characteristics | ...with descriptive adjectives                                                                  | "Happy <i>bouncy</i> eurotrash"                                                                                   |
|  | Musical Technical Aspects |                                    | When the respondent talks about the track by mentioning or describing ...                       |                                                                                                                   |
|  |                           | Bass line                          | ... the base line                                                                               | " <i>It's got a wonderfully syncopated bass line...</i> "                                                         |
|  |                           | Beat                               | ... the beat                                                                                    | "It's on my gym playlist, <i>it has a good beat</i> and I love the lyrics"                                        |
|  |                           | Hook                               | ... the hook                                                                                    | "It's the best song on the album and has a ' <i>good hook</i> '"                                                  |
|  |                           | Instrumentation                    | ... the instrumentation                                                                         | "Lyric is prayerful spiritual conversation and the artists words become my own. <i>The musical arrangement is</i> |

|  |  |                            |                                                                                       |                                                                                                                                                                                                                                                                                     |
|--|--|----------------------------|---------------------------------------------------------------------------------------|-------------------------------------------------------------------------------------------------------------------------------------------------------------------------------------------------------------------------------------------------------------------------------------|
|  |  |                            |                                                                                       | <i>dreamy with cello piano and lead guitar with vibrato. Great tasty drumming"</i>                                                                                                                                                                                                  |
|  |  | Melody                     | ... the melody                                                                        | " <b><i>The melody</i></b> is great"                                                                                                                                                                                                                                                |
|  |  | Performer                  | ... the performer(s) of the track in references to their abilities or how they sound. | " <b><i>Chrissy Constanza's voice</i></b> is exceptional"                                                                                                                                                                                                                           |
|  |  | Production                 | ... how it was produced.                                                              | "The song does a great job of transporting you into its story as Troye soulfully sings the song's simple yet effective lyrics <b><i>complimented by some excellent production</i></b> which is paced very well feeling subtle at times and then more dramatic as the song goes on." |
|  |  | Rhythm                     | ... its rhythm.                                                                       | "Love the story-telling and <b><i>the rhythm</i></b> "                                                                                                                                                                                                                              |
|  |  | Riffs/Ornamentation        | ... the riffs or ornamentations within the track.                                     | "Upbeat, catchy and <b><i>great guitar riffs</i></b> "                                                                                                                                                                                                                              |
|  |  | Song Structure/Composition | ... its composition or track structure.                                               | " <b><i>Verses are decent, so is the bear during the verses but the chorus is just so boring</i></b> "                                                                                                                                                                              |
|  |  | Sound                      | ... its overall sound.                                                                | "i like the melody and vocalist <b><i>the way the song sounds</i></b> just makes you feel things you wouldn't feel without it playing"                                                                                                                                              |

|             |             |            |                                                                                                                                         |                                                                                                                                                                                                                                                                                                   |
|-------------|-------------|------------|-----------------------------------------------------------------------------------------------------------------------------------------|---------------------------------------------------------------------------------------------------------------------------------------------------------------------------------------------------------------------------------------------------------------------------------------------------|
|             |             | Style      | ... its style.                                                                                                                          | "It is a very good song, it has a <b><i>very unique vibe/ style.</i></b> "                                                                                                                                                                                                                        |
|             |             | Tempo      | ... its tempo.                                                                                                                          | <b><i>"High tempo."</i></b>                                                                                                                                                                                                                                                                       |
|             |             | Vocals     | ... the vocals within the track, not associated with the performer                                                                      | "I like how gentle the rhythm and <b><i>vocals</i></b> are"                                                                                                                                                                                                                                       |
| Evaluations |             |            | When the respondent makes an evaluation about the track, an aspect about the track, their relationship, or familiarity about the track. |                                                                                                                                                                                                                                                                                                   |
|             | Familiarity |            | When the respondent makes an evaluation about their relationship with the track by saying...                                            |                                                                                                                                                                                                                                                                                                   |
|             |             | Familiar   | ... they are familiar with the track.                                                                                                   | <b><i>"I guess I do, only for the mere fact that I've listened to it quite a lot. I have a relationship based on all the times I've listen to it. Now I know the song perfectly but it has not been always like that, I need listening to it repeatedly to understand it as well as I do"</i></b> |
|             |             | Unfamiliar | ... they are unfamiliar with the track.                                                                                                 | "It's a fun song but <b><i>I don't know it well</i></b> "                                                                                                                                                                                                                                         |
|             | Negative    |            | When the respondent makes a negative evaluation about the track or an aspect of the track.                                              |                                                                                                                                                                                                                                                                                                   |



|                   |          |                   |                                                                                                                                     |                                                                                                                   |
|-------------------|----------|-------------------|-------------------------------------------------------------------------------------------------------------------------------------|-------------------------------------------------------------------------------------------------------------------|
|                   |          | Negative          | When the respondent makes a negative evaluation about the track or an aspect of the track.                                          | "No- <i>don't like</i> arctic monkeys"                                                                            |
|                   | Positive |                   | When the respondent makes a positive evaluation about the track or an aspect of the track by...                                     |                                                                                                                   |
|                   |          | Favourite         | ... saying it's their favourite                                                                                                     | " <i>It's my favourite song</i> by The Calling"                                                                   |
|                   |          | Positive          | ... saying they like it or an aspect of it                                                                                          | " <i>I like it</i> "                                                                                              |
| Responses Induced |          |                   | When the respondent describes or talks about their response to listening to track, how it makes them feel or what it makes them do. |                                                                                                                   |
|                   | Change   |                   | When the respondent describes or talks about their response to listening to track and feeling ...                                   |                                                                                                                   |
|                   |          | Create Atmosphere | ...a type of atmosphere                                                                                                             | "almost ambient synth intro, <b>takes its time to create an atmosphere</b> "                                      |
|                   |          | Calm              | ...calm                                                                                                                             | "Also, <i>I feel calm when playing this song</i> "                                                                |
|                   |          | Change Mood       | ... their mood generally change                                                                                                     | " <i>Yes. As I said it can change my mood</i> , make me feel like dancing and transport me into a different era." |
|                   |          | Energy            | ...more or less energy                                                                                                              | "This song, <i>boosts up my energy levels</i> and gives me the                                                    |

|  |       |                             |                                                                                                                    |                                                                                                                                                                                                                 |
|--|-------|-----------------------------|--------------------------------------------------------------------------------------------------------------------|-----------------------------------------------------------------------------------------------------------------------------------------------------------------------------------------------------------------|
|  |       |                             |                                                                                                                    | mood to work and chill at the same time"                                                                                                                                                                        |
|  |       | Happiness/Good Mood         | ... increase in their mood, positivity                                                                             | "Yes - <b><i>this song makes me laugh and smile every time I hear it!</i></b> "                                                                                                                                 |
|  |       | Motivation/Focus            | ... more motivated or focused                                                                                      | "This song was played on the radio where <b><i>the songs motivated me</i></b> to stay active"                                                                                                                   |
|  |       | Stress/Frustration /Tension | ...less or more stress, frustration or tension                                                                     | "Makes me think of happy times that lie ahead and helps me to <b><i>escape the stress</i></b> of third year!"                                                                                                   |
|  |       | Sadness                     | ...more or less sadness or crying                                                                                  | " <b><i>It makes me feel sad</i></b> because of the recent passing of the genius that is Bowie"                                                                                                                 |
|  | Match |                             | When the respondent describes or talks about their response to listening to track as...                            |                                                                                                                                                                                                                 |
|  |       | Match Mood                  | ... as matching their expectations of what they thought the track would sound like or make them feel or their mood | "It's more upbeat than the last one, and less dirgey, more uplifting, particularly the rising harmonic progression in the middle 8, <b><i>so more suited the mood I'm in which is positive right now.</i></b> " |
