# Supplementary material for: Do the shuffle: Exploring reasons for music listening through shuffled play
Source: PubMed Central journal article supplement (PMC7004375; doi:10.1371/journal.pone.0228457), 2020-02-06
Supplement: pone.0228457.s003.pdf [file pone.0228457.s003.pdf]

| Title                               | Artist             | Which App Used | Spotify link                          | Release  | BPM | Energy | Dance | Loud | Valence | Length | Acoustic | Pop. |
|-------------------------------------|--------------------|----------------|---------------------------------------|----------|-----|--------|-------|------|---------|--------|----------|------|
| 'Till I Collapse                    | Eminem             | Apple Music    | spotify:track:4xkOaSrkekMciUUogZK VTS | 5/26/02  | 171 | 85     | 57    | -3   | 10      | 4:58   | 8        | 84   |
| 1+1                                 | Beyoncé            | Spotify        | spotify:track:1pzJboOZaDNwshBnOINh3a  | 1/1/11   | 63  | 38     | 30    | -7   | 26      | 4:34   | 38       | 61   |
| 101010                              | Sleeping At Last   | Ipad           | spotify:track:3uCKzlY6QOHOpXJBsYBYKE  | 11/8/11  | 117 | 38     | 55    | -11  | 16      | 3:52   | 64       | 31   |
| 21 Guns                             | Green Day          | iTunes         | spotify:track:64yrDBpcdwEdNY9loyEGbX  | 5/15/09  | 160 | 74     | 27    | -5   | 42      | 5:21   | 5        | 75   |
| 27                                  | Passenger          | Spotify        | spotify:track:0e7J3sXc7OA6oLiNpF3wUW  | 1/1/14   | 178 | 88     | 36    | -6   | 66      | 3:20   | 2        | 38   |
| 3AM                                 | Matchbox Twenty    | Spotify        | spotify:track:5vYA1mW9g2Coh1HUFUSmlb  | 10/1/96  | 108 | 67     | 52    | -9   | 54      | 3:46   | 1        | 67   |
| 5 Years Time                        | Noah And The Whale | Spotify        | spotify:track:12je8giC2S9smUHJ81tpiL  | 1/1/08   | 122 | 55     | 80    | -7   | 75      | 3:35   | 40       | 64   |
| 6 Inch                              | Beyoncé            | iPhone iTunes  |                                       |          |     |        |       |      |         |        |          |      |
| 7 Ways to Love                      | Cola Boy           | iTunes         |                                       |          |     |        |       |      |         |        |          |      |
| 9 Mazurkas in B Major, Op.25: VIII. | Alexander Scriabin | Foobar2000     | spotify:track:5UTEMa49K               | 10/19/93 | 59  | 0      | 22    | -36  | 8       | 2:37   | 100      | 3    |

|                                                         |                              |                    |                                                  |          |     |    |    |     |    |      |    |    |
|---------------------------------------------------------|------------------------------|--------------------|--------------------------------------------------|----------|-----|----|----|-----|----|------|----|----|
| Mazurka No.8:<br>Allegretto                             |                              |                    | KBqHGIZkv<br>g559                                |          |     |    |    |     |    |      |    |    |
| A Ceremony of<br>Carols, Op. 28: V. As<br>dew in Aprile | Benjamin<br>Britten          | iPod               | spotify:track:<br>2yv77fkF0X<br>WRg8Sg5Cn<br>cp9 | 12/31/95 | 85  | 3  | 22 | -26 | 6  | 0:59 | 99 | 5  |
| A Gleyzele Jas / To<br>the Tavern                       | London<br>Klezmer<br>Quartet | Iphone             | spotify:track:<br>376m9psgJu<br>CDNlpf3UPh<br>vB | 9/9/16   | 112 | 31 | 56 | -8  | 81 | 3:59 | 78 | 3  |
| A Little You                                            | Dakota Staton                | Ipod               | spotify:track:<br>3HkYGca21<br>gcqVcAL4az<br>mSv | 3/3/14   | 122 | 57 | 71 | -8  | 93 | 2:15 | 63 | 12 |
| A Nave Vai                                              | Céu                          | Spotfy             | spotify:track:<br>2wz0xgg7iM<br>ur9QRe7PyL<br>Ah | 3/25/16  | 104 | 67 | 82 | -8  | 90 | 3:48 | 22 | 31 |
| A song for the village                                  | E L Heath                    | Ipod               |                                                  |          |     |    |    |     |    |      |    |    |
| A Windmill in Old<br>Amsterdam                          | Ronnie Hilton                | Ipod               | spotify:track:<br>7BWMWhc<br>Nkr5HVRjR<br>QnxDyk | 9/24/07  | 180 | 44 | 54 | -12 | 64 | 2:51 | 89 | 23 |
| About Today                                             | The National                 | Spotify            | spotify:track:<br>0MUh20kYF<br>OG1vN8R6<br>GEAnR | 7/20/04  | 105 | 60 | 55 | -13 | 47 | 4:11 | 30 | 59 |
| Ain't Got Far To Go                                     | Jess Glynne                  | Phone /<br>Spotify | spotify:track:<br>4fXfLQzQaR<br>7cvL8ObPz9<br>Fc | 1/1/13   | 144 | 84 | 49 | -5  | 62 | 3:23 | 0  | 53 |
| Al Araby                                                | Syriana                      | iPhone/Spot<br>ify | spotify:track:<br>3nHQy5W7<br>CQwxHzQb<br>Y2YpoH | 1/1/10   | 150 | 41 | 45 | -11 | 43 | 5:57 | 16 | 8  |

|                                                                                    |                          |                                                  |                                                  |          |     |    |    |     |    |      |     |    |
|------------------------------------------------------------------------------------|--------------------------|--------------------------------------------------|--------------------------------------------------|----------|-----|----|----|-----|----|------|-----|----|
| Alive                                                                              | Chase & Status           | iPhone                                           | spotify:track:<br>74HHgWX8<br>0N5YfZpvE<br>QOUov | 1/1/13   | 118 | 84 | 33 | -4  | 19 | 3:26 | 0   | 52 |
| All Along the<br>Watchtower                                                        | Jimi Hendrix             | Laptop/Spo<br>tify                               | spotify:track:<br>2aoo2jlRnM<br>3A0NyLQq<br>MN2f | 10/25/68 | 113 | 81 | 44 | -6  | 56 | 4:01 | 0   | 78 |
| All I Want                                                                         | Kodaline                 | Laptop -<br>Spotify                              | spotify:track:<br>2jTidefcsTu6<br>VQhpIImJrt     | 6/14/13  | 86  | 41 | 21 | -10 | 16 | 5:06 | 17  | 77 |
| All I've Got To Do -<br>Remastered 2009                                            | The Beatles              | Samsung<br>smart phone<br>/ Samsung<br>Music App | spotify:track:<br>5tztLBvTIN<br>C15Np2tnQ5<br>Ll | 11/22/63 | 119 | 58 | 49 | -10 | 88 | 2:03 | 22  | 57 |
| All In The Value                                                                   | HONNE                    | Spotify                                          | spotify:track:<br>2vcmVVUN<br>8kd3uiQtlsVr<br>1E | 7/13/16  | 91  | 63 | 66 | -5  | 63 | 3:43 | 26  | 55 |
| All That Jazz                                                                      | Liza Minnelli            | Ipod 4                                           | spotify:track:<br>3M3RB8Vw<br>7HaobeuMtf<br>wnPi | 12/17/10 | 137 | 28 | 55 | -12 | 76 | 3:04 | 66  | 23 |
| All That Jazz<br>(Originally Performed<br>By Liza Minelli) [Full<br>Vocal Version] | Chart<br>Collective      | Ipod 4th<br>generation                           | spotify:track:<br>6FF7BOOiF<br>dODq7izmEf<br>mfg | 9/1/14   | 135 | 37 | 56 | -10 | 65 | 3:10 | 25  | 0  |
| All These Things That<br>I Have Done                                               | Relaxing Piano<br>Covers | Youtube                                          | spotify:track:<br>7o8ziGuASB<br>hKKQgeJK3<br>Ktk | 1/15/16  | 219 | 7  | 45 | -33 | 5  | 5:24 | 100 | 1  |
| All These Things That<br>I've Done                                                 | The Killers              | Spotify                                          | spotify:track:<br>0OpSYP9Ol<br>y3SqmeIgiR<br>nzT | 1/1/04   | 118 | 71 | 55 | -7  | 21 | 5:02 | 0   | 66 |
| Already Dead                                                                       | Beck                     | iPad                                             | spotify:track:<br>4DuD1IHLH                      | 1/1/02   | 115 | 40 | 66 | -10 | 34 | 2:59 | 17  | 36 |

|                                    |                                       |                   |                                                  |          |     |    |    |     |    |      |    |    |
|------------------------------------|---------------------------------------|-------------------|--------------------------------------------------|----------|-----|----|----|-----|----|------|----|----|
|                                    |                                       |                   | BEBIjTdquw<br>Xkw                                |          |     |    |    |     |    |      |    |    |
| Alright                            | Darius Rucker                         | Spotify           | spotify:track:<br>6V83U8ls6D<br>Z9obszOawi<br>VR | 9/16/08  | 90  | 80 | 60 | -5  | 74 | 3:52 | 5  | 39 |
| Always Be                          | Jimmy Eat<br>World                    | Spotify           | spotify:track:<br>7LyZKnITD<br>52R7SLxoh2<br>VFq | 1/1/07   | 170 | 95 | 39 | -4  | 74 | 3:05 | 0  | 32 |
| American Girl                      | Tom Petty and<br>the<br>Heartbreakers | iTunes            | spotify:track:<br>7MRyJPksH<br>3G2cXHN8<br>UKYzP | 11/9/76  | 115 | 82 | 55 | -6  | 78 | 3:35 | 45 | 72 |
| Angel Of Music                     | Andrew Lloyd<br>Webber                | iPhone            | spotify:track:<br>5o0xOQhYxr<br>3KqYn4cRE<br>6Ed | 12/10/04 | 78  | 4  | 26 | -24 | 26 | 2:44 | 96 | 51 |
| Another Love                       | Tom Odell                             | Spotify           | spotify:track:<br>3JvKfv6T31z<br>O0ini8iNIto     | 6/21/13  | 123 | 54 | 45 | -9  | 13 | 4:04 | 70 | 74 |
| Apache                             | VOVIII                                | Spotify           | spotify:track:<br>3pe4eISKnn<br>OWoJlc9gaa<br>0z | 4/20/16  | 160 | 81 | 46 | -8  | 20 | 3:54 | 1  | 54 |
| As Long As I Have A<br>Song (Live) | Beth Hart                             | Spotify           | spotify:track:<br>6x7fzOtzXX<br>N9wF9xM9<br>WKTD | 4/13/18  | 117 | 17 | 46 | -22 | 40 | 3:33 | 84 | 30 |
| Astral Plane                       | Valerie June                          | Spotify           | spotify:track:<br>1ISGSSgVn<br>ZhyiOGSI8it<br>Na | 3/10/17  | 173 | 26 | 31 | -11 | 21 | 3:39 | 80 | 49 |
| At Last                            | Eva Cassidy                           | iPhone/<br>iTunes | spotify:track:<br>7JsklMjLX<br>2Jhoc5Xkw<br>MZE  | 1/1/00   | 85  | 11 | 52 | -12 | 13 | 2:59 | 91 | 38 |



|                               |                  |                  |                                       |          |     |    |    |     |    |      |    |    |
|-------------------------------|------------------|------------------|---------------------------------------|----------|-----|----|----|-----|----|------|----|----|
| Be Thou My Vision             | Fernando Ortega  | I tunes          | spotify:track:6T4rV6ClzikL95pSf4Nbf1  | 10/21/98 | 99  | 27 | 61 | -12 | 23 | 3:53 | 66 | 22 |
| Beach - I Wanna Make You Mine | Will Joseph Cook | Iphone - Spotify | spotify:track:0Msm5rX5o mqSlhzncBHsTL | 4/14/17  | 168 | 60 | 50 | -7  | 56 | 2:51 | 0  | 36 |
| Beautifully Unfinished        | Ella Henderson   | Phone            | spotify:track:0mDsUjzXTMVDLSVw5S8bhi  | 10/10/14 | 69  | 40 | 45 | -9  | 7  | 3:38 | 89 | 57 |
| Because - Remastered 2009     | The Beatles      | iTunes           | spotify:track:1rxoyGj1QuPoVi8fOf1Kt   | 9/26/69  | 81  | 25 | 33 | -12 | 16 | 2:46 | 75 | 59 |
| Because Of You                | Ne-Yo            | Spotify          | spotify:track:2VarpyoSpCPNKI56WSAEMN  | 1/1/07   | 110 | 54 | 81 | -6  | 84 | 4:27 | 52 | 55 |
| Because the Night             | Patti Smith      | iPhone/Spotify   | spotify:track:0lloY4ZQsdn5QzhraM9o9u  | 6/15/78  | 124 | 76 | 47 | -8  | 47 | 3:25 | 5  | 62 |
| Been On                       | G-Eazy           | iPhone/Music App | spotify:track:6EXwGsQn4r26YHEjRRpch2  | 7/18/14  | 160 | 66 | 61 | -8  | 32 | 3:29 | 11 | 40 |
| Behind Blue Eyes              | The Who          | iPod             | spotify:track:0cKk8BKei7zXbdrYdyqBP5  | 8/14/71  | 127 | 59 | 39 | -8  | 34 | 3:41 | 16 | 63 |
| Believer                      | American Authors | Spotify          | spotify:track:64ybTt8CKxPdeXBNnu08Op  | 1/1/14   | 120 | 97 | 58 | -3  | 91 | 3:04 | 0  | 53 |

|                           |                   |                    |                                                   |          |     |    |    |     |    |      |    |    |
|---------------------------|-------------------|--------------------|---------------------------------------------------|----------|-----|----|----|-----|----|------|----|----|
| Beneath - Remastered      | After Forever     | Laptop             | spotify:track:<br>4QMWMp3<br>00gPQ009I<br>BHfqgT  | 11/11/16 | 174 | 90 | 42 | -7  | 50 | 4:52 | 0  | 18 |
| Beneath Your<br>Beautiful | Labrinth          | Spotify            | spotify:track:<br>2EcsqXlxz99<br>UMDSPg5T<br>8RF  | 3/30/12  | 84  | 52 | 56 | -6  | 23 | 4:32 | 23 | 68 |
| Beta males fairytales     | Bend brother      | Iphone             |                                                   |          |     |    |    |     |    |      |    |    |
| Between The Lines         | Bonobo            | Spotify app        | spotify:track:<br>0oBV4QAFY<br>26kcYqRLR<br>v5ST  | 10/2/06  | 99  | 51 | 75 | -10 | 49 | 4:37 | 57 | 42 |
| Beverly Hills             | Weezer            | Laptop/Spo<br>tify | spotify:track:<br>1yKu2Mhpw<br>zDXXH2tzG<br>6xoa  | 5/10/05  | 88  | 82 | 69 | -4  | 74 | 3:16 | 9  | 68 |
| Big For Your Boots        | Stormzy           | Apple<br>Music     | spotify:track:<br>3uMB82o0qa<br>7erhiZBW9K<br>QC  | 2/24/17  | 175 | 90 | 52 | -5  | 63 | 3:58 | 3  | 68 |
| Big in Japan              | Guano Apes        | Media<br>player    | spotify:track:<br>3lQO10djAi0<br>Ym506za76<br>Wt  | 5/1/00   | 120 | 95 | 48 | -7  | 68 | 2:48 | 0  | 46 |
| Biggest Fan               | Brendan<br>Benson | iPod /<br>iTunes   | spotify:track:<br>0Bi9Y3VMJ<br>6Bfxl2ZkGl<br>Bvm  | 1/1/05   | 114 | 67 | 45 | -6  | 34 | 3:43 | 11 | 6  |
| Black Bird                | Peter Puppig      | Spotify            | spotify:track:<br>3LCHjekA3<br>EtpXdfyBMe<br>KRra | 7/1/07   | 99  | 23 | 44 | -15 | 38 | 2:14 | 86 | 32 |
| Blessed Be the Lord       | Joyce Blessing    | Spotify            | spotify:track:<br>1ck6BECB1<br>9dWlQpmM           | 9/13/14  | 80  | 74 | 62 | -4  | 86 | 5:03 | 42 | 7  |

|                                     |                 |                                |                                                  |          |     |    |    |     |    |      |    |    |
|-------------------------------------|-----------------|--------------------------------|--------------------------------------------------|----------|-----|----|----|-----|----|------|----|----|
|                                     |                 |                                | 5uCv8                                            |          |     |    |    |     |    |      |    |    |
| Blood On Blood                      | Bon Jovi        | iPOD                           | spotify:track:<br>3e8Tr6rsHL<br>NeoUwYCL<br>Zgvy | 9/13/88  | 138 | 93 | 36 | -6  | 48 | 6:17 | 1  | 47 |
| Blood on Me                         | Sampha          | Spotify                        | spotify:track:<br>37el170lJYr5<br>CiWJFk207u     | 2/3/17   | 104 | 52 | 78 | -8  | 61 | 4:07 | 12 | 60 |
| Blow Your Mind<br>(Mwah)            | Dua Lipa        | Spotify                        | spotify:track:<br>7kslwV15nsh<br>9oefSuuPNN<br>9 | 6/2/17   | 109 | 80 | 65 | -5  | 49 | 2:59 | 2  | 59 |
| Blue [Da Ba Dee]                    | Eiffel 65       | Spotify                        | spotify:track:<br>3UCDrOA37<br>BBdcExyIpN<br>3Xj | 1/1/99   | 128 | 98 | 78 | -4  | 81 | 4:44 | 16 | 59 |
| Boats Against the<br>Current - Live | Ryan O'Reilly   | Default<br>iphone<br>music app | spotify:track:<br>0vn0y8Drfo<br>Na188xik99<br>X5 | 12/15/14 | 136 | 27 | 52 | -12 | 41 | 6:17 | 75 | 17 |
| Bodyrock                            | Moby            | iTunes                         | spotify:track:<br>3aTb5EUBO<br>lNDSEcaTFI<br>7Jj | 5/17/99  | 108 | 87 | 65 | -8  | 35 | 3:36 | 0  | 49 |
| Bootylicious                        | Destiny's Child | Desktop                        | spotify:track:<br>41nT1Sp6Ch<br>R65FbsdLIF<br>HW | 5/1/01   | 103 | 84 | 84 | -4  | 64 | 3:28 | 0  | 65 |
| Born Slippy (Nuxx)                  | Underworld      | Spotify                        | spotify:track:<br>1zsDbmrf4Z<br>kjW5hsSsaDj<br>O | 1/1/14   | 140 | 95 | 58 | -9  | 30 | 7:36 | 0  | 63 |
| Born to Lose (feat. Gia<br>Koka)    | No Sleep        | Soundcloud                     | spotify:track:<br>2oXwrVhXd<br>nQDpYEnr4<br>cAlc | 9/12/16  | 95  | 54 | 56 | -7  | 19 | 3:12 | 26 | 42 |



|                                      |                     |                          |                                      |         |     |    |    |     |    |      |    |    |
|--------------------------------------|---------------------|--------------------------|--------------------------------------|---------|-----|----|----|-----|----|------|----|----|
| Boston                               | Moose Blood         | iPhone/Music             | spotify:track:4f4pO1KnII2N6plSdq37rh | 10/6/14 | 160 | 92 | 40 | -6  | 43 | 2:32 | 0  | 34 |
| Boy Who Cried Wolf                   | The Style Council   | iphone                   | spotify:track:71EuOv5ncg5oz9IvTNAgtg | 1/1/85  | 98  | 84 | 67 | -6  | 84 | 5:15 | 20 | 26 |
| Boys Don't Cry                       | The Cure            | Spotify                  | spotify:track:1QFh8OH1e78dGd3VyJZCAC | 5/11/79 | 169 | 84 | 46 | -6  | 67 | 2:36 | 1  | 69 |
| Braveheart                           | Neon Jungle         | YouTube                  | spotify:track:0XUvhSzizkEtPgBr1BZ2an | 8/26/14 | 128 | 73 | 70 | -4  | 59 | 3:44 | 19 | 53 |
| Break In                             | CIRRUS              | Spotify                  | spotify:track:5IlwLYrfOVMf2ITB3dEH0o | 1/1/97  | 110 | 97 | 70 | -8  | 44 | 5:27 | 0  | 13 |
| Break On Through (To The Other Side) | The Doors           | Amazon Music             | spotify:track:6ToM0uwxtPKo9CMpbPGYvM | 1/4/67  | 90  | 75 | 42 | -10 | 79 | 2:26 | 20 | 71 |
| Breaking The Law                     | Emeli Sandé         | Default iPhone music app | spotify:track:6YpwjKx1N6s88hNqgtqo31 | 1/1/12  | 118 | 13 | 58 | -9  | 33 | 2:56 | 87 | 31 |
| Brighter                             | Against The Current | Phone                    | spotify:track:7D8KHKHM0XrmZHu1dlom8H | 5/20/16 | 158 | 85 | 46 | -4  | 31 | 3:27 | 1  | 44 |
| Brown Eyed Girl                      | Van Morrison        | Spotify                  | spotify:track:3yrSvpt2l1xhsV9Em88Pul | 9/1/67  | 151 | 58 | 49 | -11 | 91 | 3:03 | 18 | 81 |
| Bubbles                              | Biffy Clyro         | Apple Music              | spotify:track:051BXOMA1uHpVPEQZy     | 1/18/10 | 147 | 72 | 35 | -6  | 20 | 5:01 | 0  | 54 |

|                             |                     |                            |                                      |          |     |    |    |     |    |      |    |    |
|-----------------------------|---------------------|----------------------------|--------------------------------------|----------|-----|----|----|-----|----|------|----|----|
|                             |                     |                            | joh3                                 |          |     |    |    |     |    |      |    |    |
| Bulls In The Bronx          | Pierce The Veil     | Windows Phone/Groove Music | spotify:track:23UoI3jIFiWdo5jadUYo69 | 7/17/12  | 160 | 93 | 47 | -3  | 33 | 4:28 | 0  | 61 |
| Burguesinha                 | Seu Jorge           | Iphone                     | spotify:track:3mXjQTPztvXVRuL6tt6jY3 | 1/25/08  | 102 | 95 | 68 | -5  | 96 | 4:18 | 56 | 50 |
| Burning Up (Fire)           | BTS                 | Apple Music                | spotify:track:4z9gBZQjGS4QLb4LOvmeuA | 5/2/16   | 100 | 71 | 63 | -3  | 54 | 3:23 | 0  | 75 |
| Cabinet Battle #2           | Christopher Jackson | Spotify                    | spotify:track:6KRHMYPIWRgFWXPgqO2Fp  | 9/25/15  | 99  | 54 | 75 | -9  | 52 | 2:23 | 6  | 63 |
| Cake By The Ocean           | DNCE                | Laptop on spotify          | spotify:track:76hfruVvmfQbw0eYn1nmeC | 11/18/16 | 119 | 77 | 77 | -5  | 92 | 3:39 | 16 | 80 |
| Call The Shots              | Girls Aloud         | iPod touch/Spotify         | spotify:track:5uCVGDHnoBBlsVkTIXIWZ9 | 1/1/07   | 125 | 74 | 64 | -5  | 82 | 3:45 | 0  | 49 |
| Calling You                 | Jeff Buckley        | youtube                    | spotify:track:0TUFDBFzCh1HnswoluQgAH | 3/11/16  | 93  | 4  | 35 | -17 | 6  | 4:59 | 90 | 37 |
| Can't Cry                   | J. Cole             | iPhone                     | spotify:track:212LPeYsfjZjjNbnRhRkbD | 7/31/12  | 73  | 60 | 48 | -12 | 37 | 4:16 | 16 | 31 |
| Can't Stop Your Love - Live | Worship Central     | Spotify                    | spotify:track:271asm0EIZHJdxxfW0iO   | 10/26/14 | 156 | 70 | 34 | -7  | 9  | 5:54 | 10 | 32 |

|                                 |                 |                       |                                      |         |     |    |    |     |    |      |    |    |
|---------------------------------|-----------------|-----------------------|--------------------------------------|---------|-----|----|----|-----|----|------|----|----|
|                                 |                 |                       | Qt                                   |         |     |    |    |     |    |      |    |    |
| Capacity (Breathe)              | Jonathan Nelson | Apple music           | spotify:track:0LNoA2DtJeUpMhbscaCbeX | 2/1/08  | 145 | 29 | 32 | -13 | 14 | 4:00 | 81 | 18 |
| Capsize                         | Big Black Delta | Android phone/Spotify | spotify:track:0oMId7rKJvsQiWiAp1X7fY | 4/29/13 | 98  | 74 | 42 | -5  | 19 | 4:53 | 0  | 47 |
| Cash Out                        | Calvin Harris   | Spotify               | spotify:track:0Ws8D3EWUDgY962Xftb0h5 | 6/30/17 | 95  | 79 | 72 | -5  | 43 | 3:56 | 15 | 65 |
| Castle                          | Halsey          | Deezer                | spotify:track:16w8ZGVSjI4TITLV8VimBY | 8/28/15 | 130 | 57 | 63 | -7  | 16 | 4:38 | 25 | 68 |
| Castle on the Hill              | Ed Sheeran      | Iphone                | spotify:track:6PCUP3dWmTjcTtXY02oFdT | 3/3/17  | 135 | 83 | 46 | -5  | 47 | 4:21 | 2  | 83 |
| Castle on the Hill              | Ed Sheeran      | iTunes                | spotify:track:6PCUP3dWmTjcTtXY02oFdT | 3/3/17  | 135 | 83 | 46 | -5  | 47 | 4:21 | 2  | 83 |
| Castle on the Hill              | Ed Sheeran      | Spotify               | spotify:track:6PCUP3dWmTjcTtXY02oFdT | 3/3/17  | 135 | 83 | 46 | -5  | 47 | 4:21 | 2  | 83 |
| Catch & Release - Deepend Remix | Matt Simons     | Spotify               | spotify:track:11BAVEGiIivJ6JWLqKUNrZ | 9/30/15 | 105 | 54 | 84 | -9  | 11 | 3:15 | 56 | 66 |
| Catch Us If You Can             | Elle King       | Phone                 | spotify:track:1QPkehLYh9rHaYtDvzC    | 4/12/15 | 122 | 92 | 66 | -3  | 69 | 3:18 | 2  | 40 |

|                                                               |                  |              |                                                  |          |     |    |    |     |    |      |    |    |
|---------------------------------------------------------------|------------------|--------------|--------------------------------------------------|----------|-----|----|----|-----|----|------|----|----|
|                                                               |                  |              | i3y                                              |          |     |    |    |     |    |      |    |    |
| Cathouse                                                      | Faster Pussycat  | Iphone       | spotify:track:<br>4JFum0u7utv<br>jp0aeT6RpHI     | 7/1/87   | 167 | 90 | 37 | -13 | 48 | 3:43 | 7  | 27 |
| Chaconne                                                      | Victoria Mullova | iphone       |                                                  |          |     |    |    |     |    |      |    |    |
| Chain of Lakes                                                | Sioux Falls      | Spotify      | spotify:track:<br>572gFxd0Ah<br>g75t4b5vAH<br>Xz | 2/19/16  | 178 | 64 | 27 | -7  | 37 | 2:18 | 2  | 15 |
| Chained To The Rhythm                                         | Katy Perry       | Itunes       | spotify:track:<br>7qvxFz3Jod<br>M0A7xEM7<br>k3YD | 6/9/17   | 190 | 80 | 45 | -5  | 47 | 3:58 | 8  | 73 |
| Chained To The Rhythm - Oliver Heldens Remix                  | Katy Perry       | Spotify      | spotify:track:<br>1j5jfLir1Wsy<br>WPm7rmfjk      | 3/24/17  | 120 | 86 | 72 | -5  | 32 | 4:37 | 0  | 45 |
| Cheap Thrills                                                 | Sia              | spotify      | spotify:track:<br>3S4px9f4lce<br>WdKf0gWci<br>Fu | 10/21/16 | 90  | 70 | 63 | -6  | 73 | 3:32 | 5  | 75 |
| Cheap Thrills (DJ Metawee Unofficial Remix) - Sia & Sean Paul | DJ Metawee       | iPhone music | spotify:track:<br>0iNUvGgr07<br>lUZfbf1Pqyir     | 1/4/18   | 100 | 94 | 68 | -3  | 92 | 4:34 | 29 | 11 |
| Cheerleader - Felix Jaehn Remix Radio Edit                    | OMI              | Spotify      | spotify:track:<br>7vFoFDWqT<br>X0mHzLfrF1<br>Cfy | 10/16/15 | 118 | 69 | 78 | -6  | 60 | 3:01 | 17 | 79 |
| Cheerleader - Felix Jaehn Remix Radio Edit                    | OMI              | iTunes       | spotify:track:<br>7vFoFDWqT<br>X0mHzLfrF1<br>Cfy | 10/16/15 | 118 | 69 | 78 | -6  | 60 | 3:01 | 17 | 79 |
| Cherry                                                        | Moose Blood      | Spotify      | spotify:track:<br>1YOjkOcpU                      | 10/6/14  | 182 | 25 | 37 | -13 | 24 | 2:40 | 90 | 43 |

|                                                                      |                      |                              |                                                  |          |     |    |    |     |    |       |    |    |
|----------------------------------------------------------------------|----------------------|------------------------------|--------------------------------------------------|----------|-----|----|----|-----|----|-------|----|----|
|                                                                      |                      |                              | SFs0YBoLp<br>EBt                                 |          |     |    |    |     |    |       |    |    |
| Children                                                             | Justin Bieber        | iPhone<br>Spotify            | spotify:track:<br>6O8I0ffpEty<br>MQmMYo0b<br>j4N | 11/13/15 | 127 | 89 | 63 | -5  | 33 | 3:43  | 1  | 58 |
| Chop Suey!                                                           | System Of A<br>Down  | Spotify                      | spotify:track:<br>5V3mdRI2y<br>QxbSsJGDPc<br>5ID | 1/1/01   | 127 | 93 | 42 | -4  | 30 | 3:30  | 0  | 77 |
| Chwyldro                                                             | Gwenno               | Android<br>phone/Spoti<br>fy | spotify:track:<br>2BoIRe1Q3<br>MFA8o2CPq<br>Aqcs | 7/24/15  | 120 | 79 | 61 | -6  | 50 | 5:19  | 32 | 23 |
| Clair de Lune                                                        | Kamasi<br>Washington | Spotify                      | spotify:track:<br>273VxALm7<br>22DRN4PNu<br>jOF8 | 5/11/15  | 130 | 35 | 35 | -10 | 21 | 11:08 | 76 | 37 |
| Clap Track 4                                                         | Dorian Concept       | Spotify                      | spotify:track:<br>6TkvfX67Lr<br>wib3l01XaJv<br>N | 10/20/14 | 64  | 31 | 24 | -10 | 15 | 3:18  | 48 | 16 |
| Close (In the Style of<br>Nick Jonas & Tove<br>Lo) [Karaoke Version] | Global Karaoke       | Laptop on<br>spotify         | spotify:track:<br>4vIulJpSe9sf<br>Ta2VBDxg1r     | 5/25/16  | 124 | 34 | 70 | -11 | 16 | 3:54  | 66 | 11 |
| Closer                                                               | The<br>Chainsmokers  | Spotify                      | spotify:track:<br>7BKLCZ1jb<br>UBVqRi2FV<br>ITVw | 7/29/16  | 95  | 52 | 75 | -6  | 66 | 4:05  | 41 | 87 |
| Cocoon                                                               | Milky Chance         | iPhone 6                     | spotify:track:<br>5t2QCWdTP<br>l4UlzkiEbK<br>VCQ | 3/17/17  | 114 | 71 | 74 | -6  | 79 | 4:14  | 8  | 52 |
| Com Touch                                                            | Clark                | Foobar2000                   | spotify:track:<br>2xKnrarkfG4<br>vP7xx1rs3M<br>h | 4/2/12   | 90  | 94 | 53 | -8  | 34 | 4:24  | 20 | 28 |

|                                                     |                                          |                     |                                      |         |     |    |    |     |    |      |    |    |
|-----------------------------------------------------|------------------------------------------|---------------------|--------------------------------------|---------|-----|----|----|-----|----|------|----|----|
| Control (feat. Jay Electronica & Big Sean)          | Kendrick Lamar                           | Spotify/Laptop      | spotify:track:4Tbt7DA48fEodJqDTcjXCc | 9/15/14 | 65  | 93 | 35 | -6  | 72 | 7:30 | 20 | 41 |
| Correlli                                            | Concerto grosso, D major, Op. 6, Andante | spotify             |                                      |         |     |    |    |     |    |      |    |    |
| Counting Stars                                      | OneRepublic                              | Iphone              | spotify:track:2tpWsVSb9UEmDRxA11zhX1 | 1/1/13  | 122 | 71 | 66 | -5  | 48 | 4:17 | 7  | 79 |
| Crazy In Love                                       | Beyoncé                                  | Galaxy S6 / Spotify | spotify:track:5IVuqXILoxVWvWEPm82Jxr | 6/24/03 | 99  | 77 | 65 | -7  | 68 | 3:56 | 0  | 78 |
| Crazy Love, Vol. II - Paul Oakenfold Extended Remix | Paul Simon                               | iTunes Laptop       | spotify:track:3EWKerGURNzI4f1XjikaPP | 6/1/18  | 124 | 56 | 81 | -8  | 66 | 3:55 | 1  | 59 |
| Creep                                               | Radiohead                                | Ipod classic        | spotify:track:6b2oQwSGFkzsMtQruIWm2p | 2/22/93 | 92  | 43 | 52 | -10 | 10 | 3:59 | 1  | 81 |
| Cricket On The Hearth                               | Bryan Sutton                             | Spotify             | spotify:track:2mYvNKOmhsBUswqsXc0Sii | 4/29/14 | 151 | 71 | 35 | -12 | 97 | 2:49 | 58 | 27 |
| crushcrusherush                                     | Paramore                                 | spotify             | spotify:track:4m9NfjevXsDVaLtM1kj0Sx | 6/11/07 | 137 | 79 | 63 | -4  | 65 | 3:09 | 0  | 63 |
| Cry to Me                                           | Solomon Burke                            | iTunes              | spotify:track:2sCf9tz6LHByczuVT7rqIx | 1/1/98  | 115 | 62 | 73 | -10 | 91 | 2:35 | 62 | 60 |

|                        |                    |                     |                                                  |         |     |    |    |     |    |      |    |    |
|------------------------|--------------------|---------------------|--------------------------------------------------|---------|-----|----|----|-----|----|------|----|----|
| Dakota                 | Stereophonics      | iTunes              | spotify:track:<br>3qaSqrrvBr<br>b84x15JlptU      | 1/1/05  | 147 | 93 | 51 | -3  | 31 | 4:57 | 13 | 65 |
| Dapper                 | Domo Genesis       | Laptop/Spo<br>tify  | spotify:track:<br>2Nh2cMryo<br>Xl7BrZoleN<br>2Pr | 3/25/16 | 113 | 59 | 75 | -9  | 56 | 3:13 | 7  | 62 |
| Dasshutsu              | Joe Hisaishi       | Sansa Clip<br>Sport |                                                  |         |     |    |    |     |    |      |    |    |
| Dazzle                 | Oh Wonder          | Spotify             | spotify:track:<br>2KYyhbWmf<br>bW4z8eMhF<br>zme4 | 9/4/15  | 112 | 42 | 65 | -8  | 61 | 3:07 | 59 | 56 |
| Demons                 | Imagine<br>Dragons | Spotify             | spotify:track:<br>5qaEfEh1At<br>SdrdrByCP7<br>qR | 1/1/12  | 90  | 71 | 50 | -3  | 38 | 2:58 | 19 | 77 |
| Depende                | Jarabe De Palo     | Mp3                 | spotify:track:<br>6aaPUBUFw<br>9KEW1p1in<br>VQv9 | 1/1/98  | 95  | 53 | 70 | -12 | 52 | 4:25 | 12 | 63 |
| Despacito - Remix      | Luis Fonsi         | Spotify             | spotify:track:<br>6rPO02ozF3<br>bM7NnOV4<br>h6s2 | 4/17/17 | 178 | 82 | 65 | -4  | 82 | 3:49 | 23 | 84 |
| Desperado              | Eagles             | Spotify             | spotify:track:<br>2TjnCxxQR<br>Yn56Ye8gk<br>UKiW | 1/1/73  | 60  | 22 | 23 | -13 | 18 | 3:34 | 95 | 65 |
| DESPITE THE<br>WEATHER | KAYTRANAD<br>A     | Laptop/Spo<br>tify  | spotify:track:<br>5ytmV00jr7d<br>i9K0O10dkB<br>O | 5/6/16  | 108 | 53 | 78 | -9  | 44 | 2:02 | 4  | 50 |
| Diphylleia grayi       | Jonghyun           | Phone               | spotify:track:<br>5zkaZh7IKPf<br>in3eRNkqfL<br>Q | 9/17/15 | 66  | 24 | 34 | -10 | 32 | 4:35 | 91 | 45 |

|                                                 |                          |                           |                                        |         |     |    |    |     |    |      |    |    |
|-------------------------------------------------|--------------------------|---------------------------|----------------------------------------|---------|-----|----|----|-----|----|------|----|----|
| Dirty Little Secret                             | The All-American Rejects | Phone (Samsung Galaxy S6) | spotify:track:2jYmE3Xg0iNDySUm4mqy6Q   | 1/1/05  | 144 | 96 | 47 | -5  | 45 | 3:14 | 0  | 57 |
| Dog Days Are Over                               | Florence + The Machine   | Spotify                   | spotify:track:456WNXWhDwYOSf5SpTuqxd   | 1/1/09  | 150 | 81 | 50 | -5  | 26 | 4:13 | 3  | 70 |
| Dog Days Are Over                               | Florence + The Machine   | iPhone, spotify           | spotify:track:456WNXWhDwYOSf5SpTuqxd   | 1/1/09  | 150 | 81 | 50 | -5  | 26 | 4:13 | 3  | 70 |
| Don't                                           | Ed Sheeran               | iPhone                    | spotify:track:1huvTbEYtgl tjQRXzrNK Gi | 6/21/14 | 95  | 61 | 81 | -7  | 85 | 3:40 | 1  | 77 |
| Don't Know Why                                  | Norah Jones              | Spotify                   | spotify:track:6ybViy2qrO9sli41EgRjGx   | 2/26/02 | 88  | 20 | 73 | -12 | 62 | 3:06 | 88 | 73 |
| Don't Let Me Bring You Down                     | Laura Marling            | iTunes                    | spotify:track:0JqP4OqNrA0fDLYSRjDs pO  | 3/20/15 | 128 | 61 | 48 | -10 | 51 | 3:10 | 2  | 24 |
| Don't Mind                                      | Kent Jones               | Spotify                   | spotify:track:27PmvZoffODNFW2p7eh ZTQ  | 4/25/16 | 159 | 77 | 46 | -5  | 69 | 3:18 | 2  | 70 |
| Don't Stop 'Til You Get Enough - Single Version | Michael Jackson          | iTunes                    | spotify:track:46eu3SBuFCXWsPT39Yg3tJ   | 8/10/79 | 119 | 82 | 88 | -10 | 95 | 6:05 | 13 | 76 |
| Don't Think                                     | Truckstop Honeymoon      | iPod                      | spotify:track:51QRJyuiwfqADNfZR4N7n1   | 1/1/08  | 78  | 44 | 81 | -12 | 84 | 3:31 | 55 | 1  |



|                                                                                         |                     |                                             |                                                  |          |     |    |    |     |    |      |    |    |
|-----------------------------------------------------------------------------------------|---------------------|---------------------------------------------|--------------------------------------------------|----------|-----|----|----|-----|----|------|----|----|
| Don't Wait                                                                              | Joey Graceffa       | Iphone                                      | spotify:track:<br>5sBdbAZ2a2<br>LJ775CsbkM<br>2h | 5/12/15  | 124 | 84 | 68 | -7  | 45 | 3:26 | 5  | 51 |
| Don't Wait                                                                              | Joey Graceffa       | Windows<br>music<br>player on<br>my phone   | spotify:track:<br>5sBdbAZ2a2<br>LJ775CsbkM<br>2h | 5/12/15  | 124 | 84 | 68 | -7  | 45 | 3:26 | 5  | 51 |
| Don't You Need<br>Somebody (feat.<br>Enrique Iglesias, R.<br>City, Serayah &<br>Shaggy) | RedOne              | Phone                                       | spotify:track:<br>1TPUbLdzpf<br>gF7wrPEXI<br>AAB | 5/20/16  | 93  | 70 | 69 | -6  | 61 | 3:28 | 25 | 60 |
| Done Wrong                                                                              | Ani DiFranco        | samsung<br>phone<br>music<br>player         | spotify:track:<br>23vXAB3EA<br>jSLILKCGO<br>NTUq | 5/1/96   | 120 | 34 | 56 | -12 | 8  | 6:34 | 7  | 22 |
| Donny Novitski                                                                          | Corey Cott          | Ipod 4th<br>Generation                      | spotify:track:<br>59R9kh8emf<br>ffKehyQEAX<br>jZ | 5/14/18  | 84  | 52 | 56 | -8  | 48 | 3:45 | 71 | 35 |
| dopemang (feat.<br>Ashley All Day)                                                      | Kiiara              | Spotify                                     | spotify:track:<br>0mnoeoS9Uk<br>lYuKVbkwC<br>kAX | 11/4/16  | 151 | 51 | 66 | -6  | 37 | 2:49 | 18 | 56 |
| Dord Waltz                                                                              | Elaine "OJ"<br>Wang | Spotify/lapt<br>op                          |                                                  |          |     |    |    |     |    |      |    |    |
| Down In The Tube<br>Station At Midnight -<br>Single Version                             | The Jam             | Google play<br>music on<br>android<br>phone | spotify:track:<br>1EYsaOzRtl<br>TY1fG8BBaJ<br>vt | 10/14/83 | 173 | 81 | 28 | -8  | 79 | 4:02 | 4  | 44 |
| Down The Line                                                                           | John Newman         | ipod                                        | spotify:track:<br>4AFvk4BAc<br>448o074gE6<br>AuP | 1/1/14   | 142 | 32 | 42 | -11 | 23 | 3:55 | 81 | 35 |

|                     |               |                                       |                                      |          |     |    |    |     |    |      |    |    |
|---------------------|---------------|---------------------------------------|--------------------------------------|----------|-----|----|----|-----|----|------|----|----|
| Down Under          | Men At Work   | Phone/amazon prime music              | spotify:track:46RVKt5Edm1zl0rXhPJZxz | 1/30/96  | 107 | 79 | 75 | -5  | 89 | 3:41 | 5  | 76 |
| Dr Wu               | Steely Dan    | Laptop iTunes                         |                                      |          |     |    |    |     |    |      |    |    |
| Dream House         | Deafheaven    | iTunes                                | spotify:track:6saVnhFqQ2270dJBveTCha | 5/28/13  | 82  | 80 | 12 | -5  | 10 | 9:15 | 0  | 48 |
| Drive               | Incubus       | Apple iphone music app                | spotify:track:7nnWIPM5hwE3DaUBkvOipy | 10/26/99 | 91  | 79 | 65 | -7  | 67 | 3:52 | 6  | 77 |
| Du hast             | Rammstein     | Spotify                               | spotify:track:5awDvzxWfd53SSrsRZ8pXO | 8/22/97  | 125 | 92 | 64 | -6  | 72 | 3:54 | 0  | 70 |
| Dust In Your Pocket | Glass Animals | Google Play Music on an Android phone | spotify:track:714LbDMCzRGIszBfRviwqg | 5/28/12  | 120 | 38 | 78 | -13 | 11 | 4:00 | 39 | 48 |
| Dynamite            | Taio Cruz     | I tunes                               | spotify:track:2CEgGE6aESpnmfIZwYlbV  | 1/1/10   | 120 | 78 | 75 | -4  | 82 | 3:23 | 0  | 75 |
| Dynamite - Acoustic | Sigrid        | Spotify                               | spotify:track:413N9GI94jlsGWzZ4V4mSZ | 5/5/17   | 114 | 15 | 55 | -11 | 33 | 3:52 | 96 | 57 |
| Eagle Tax           | Mogwai        | iTunes Laptop                         | spotify:track:0ILZnL5JmrUvkbt8wmMmyH | 2/25/13  | 103 | 47 | 59 | -13 | 4  | 3:22 | 77 | 26 |

|                                                                                                                      |                      |            |                                                  |          |     |     |    |     |    |      |     |    |
|----------------------------------------------------------------------------------------------------------------------|----------------------|------------|--------------------------------------------------|----------|-----|-----|----|-----|----|------|-----|----|
| Early Morning Light                                                                                                  | Sarah Jarosz         | Spotify    | spotify:track:<br>25uT0EtNW<br>SKjICEjTQj<br>ZDT | 6/17/16  | 91  | 4   | 61 | -11 | 41 | 2:36 | 91  | 41 |
| Easy Street (From the Musical "Annie") [Karaoke Version] - Originally Performed By Original Broadway Cast of "Annie" | A-Type Player        | Samsung S6 | spotify:track:<br>3iX2bPXAW<br>9U4k0vSiK4<br>gXv | 10/4/13  | 109 | 26  | 37 | -12 | 10 | 4:32 | 74  | 0  |
| Emergency                                                                                                            | Paramore             | Phone      | spotify:track:<br>3i4xZSH1kT<br>LE22TUvUF<br>MYo | 7/26/05  | 168 | 94  | 42 | -4  | 56 | 4:00 | 0   | 59 |
| Empire (Let Them Sing)                                                                                               | Bring Me The Horizon | iPod       | spotify:track:<br>1DbdQp5dw<br>uawBGmxS<br>Hw6Fr | 3/29/13  | 97  | 96  | 44 | -3  | 26 | 3:46 | 0   | 52 |
| En hjältes väg                                                                                                       | Raubtier             | Computer   | spotify:track:<br>1yWN5e8qL<br>Ix9zluOJnS8<br>q4 | 9/22/10  | 150 | 95  | 42 | -4  | 33 | 4:42 | 0   | 39 |
| English Rose                                                                                                         | Ed Sheeran           | Spotify    | spotify:track:<br>3B8BedGdU<br>GT1Ixog6v8<br>ua8 | 11/13/15 | 115 | 65  | 58 | -7  | 18 | 3:04 | 10  | 55 |
| Epidemic                                                                                                             | Slayer               | iTunes     | spotify:track:<br>3wDpbLxFu<br>MEYN0QcC<br>2z393 | 1/1/86   | 98  | 100 | 40 | -4  | 9  | 2:23 | 0   | 34 |
| Étude No. 3 in E Major, Op. 10: III. Tristesse                                                                       | Frédéric Chopin      | Spotify    | spotify:track:<br>6FoU9AHor<br>RU5EsBGF<br>Nbssf | 8/29/17  | 72  | 6   | 40 | -23 | 4  | 4:12 | 100 | 36 |
| Everybody Knows                                                                                                      | Leonard Cohen        | iPod       | spotify:track:<br>60s0QWaOZ<br>2UTzqdIHB         | 2/2/88   | 104 | 46  | 79 | -14 | 69 | 5:35 | 64  | 55 |

|                                                                                  |                            |              |                                                  |          |     |    |    |     |    |          |    |    |
|----------------------------------------------------------------------------------|----------------------------|--------------|--------------------------------------------------|----------|-----|----|----|-----|----|----------|----|----|
|                                                                                  |                            |              | Ct3x                                             |          |     |    |    |     |    |          |    |    |
| Everything                                                                       | Michael Bublé              | iPod         | spotify:track:<br>4T6HLdP6O<br>cAtqC6tGnQ<br>elG | 4/27/07  | 123 | 69 | 69 | -5  | 49 | 3:32     | 39 | 72 |
| Everything Your Heart<br>Desires                                                 | Daryl Hall &<br>John Oates | iPod classic | spotify:track:<br>4AiVt49hSjk<br>kArFOIIAZh<br>L | 7/27/88  | 100 | 86 | 71 | -6  | 89 | 5:00     | 16 | 39 |
| Everywhere You Go<br>(Villalobos Celestial<br>Voice Amnesia<br>Resurrection Mix) | Mari Kvien<br>Brunvoll     | Spotify      | spotify:track:<br>4SQnDqH8U<br>fgciQ9GTL0<br>MXY | 3/24/14  | 120 | 36 | 81 | -16 | 41 | 28:32:00 | 0  | 39 |
| Ex Calling                                                                       | 6LACK                      | Spotify      | spotify:track:<br>1MQ8ydvrT<br>nn2QJgXFA<br>TJvD | 11/18/16 | 156 | 56 | 77 | -7  | 6  | 3:32     | 1  | 75 |
| Exiles                                                                           | David Cross                | iPod         | spotify:track:<br>2M8G0wzsu<br>M1gwwAVV<br>RDY8I | 4/1/10   | 82  | 46 | 50 | -12 | 38 | 5:59     | 7  | 13 |
| Experience The Jewel                                                             | Wintersleep                | iTunes       |                                                  |          |     |    |    |     |    |          |    |    |
| Eye Of The Beholder                                                              | Metallica                  | iTunes       | spotify:track:<br>7p2yIOf8YX<br>JUSmUnG3T<br>AWr | 8/25/88  | 122 | 81 | 64 | -9  | 59 | 6:30     | 0  | 51 |
| Facedown                                                                         | The 1975                   | spotify      | spotify:track:<br>66mhOWjoT<br>LTXm7y7V1<br>eHRs | 9/2/13   | 141 | 43 | 14 | -12 | 3  | 2:49     | 11 | 42 |
| Faded                                                                            | Alan Walker                | Spotify      | spotify:track:<br>7gHs73wEL<br>deycvS48Jflo<br>s | 12/4/15  | 90  | 65 | 59 | -5  | 17 | 3:33     | 3  | 84 |

|                                                |                                   |                                                                  |                                                  |         |     |    |    |     |    |      |    |    |
|------------------------------------------------|-----------------------------------|------------------------------------------------------------------|--------------------------------------------------|---------|-----|----|----|-----|----|------|----|----|
| Faint                                          | Linkin Park                       | iTunes                                                           | spotify:track:<br>7AB0cUXnzu<br>SlAnyHOq<br>mrZr | 3/24/03 | 135 | 98 | 55 | -4  | 59 | 2:43 | 11 | 66 |
| Fake Plastic Trees                             | Radiohead                         | iTunes on<br>iPhone<br>(also used<br>to complete<br>this survey) | spotify:track:<br>045sp2JToyT<br>aaKyXkGejP<br>y | 3/28/95 | 74  | 23 | 45 | -13 | 13 | 4:51 | 17 | 69 |
| Falling Slowly                                 | Glen Hansard &<br>Marketa Irglova | Spotify                                                          | spotify:track:<br>7M3FoO2rv<br>MsAeRTCg1<br>hYoe | 8/21/06 | 138 | 33 | 28 | -9  | 11 | 4:53 | 54 | 29 |
| False Hope                                     | Laura Marling                     | Ipod                                                             | spotify:track:<br>3C1vt8YmxX<br>MUE5mCO<br>Q7Cz9 | 3/20/15 | 134 | 72 | 46 | -9  | 36 | 3:12 | 2  | 34 |
| Fanfare for the<br>Common Man - Single<br>Edit | Emerson, Lake<br>& Palmer         | Spotify                                                          | spotify:track:<br>0dkL8m14x0<br>webq04QfB<br>Ks  | 1/1/94  | 73  | 44 | 37 | -14 | 27 | 2:59 | 41 | 46 |
| Fans                                           | Kings of Leon                     | Apple<br>Music on<br>iPhone                                      | spotify:track:<br>6LEJsHo21k<br>CF3Bf1kpSN<br>76 | 4/3/07  | 104 | 72 | 42 | -6  | 35 | 3:36 | 3  | 56 |
| Fifty On Our<br>Foreheads                      | White Lies                        | Spotify on<br>my PC<br>again                                     | spotify:track:<br>7MuM8ChF<br>TheRVvVnyI<br>8p4m | 1/1/09  | 112 | 68 | 58 | -7  | 53 | 4:22 | 0  | 31 |
| Fight The Power                                | Public Enemy                      | iPhone -<br>Spotify                                              | spotify:track:<br>26zWdOUpB<br>6P9E9OtQQ<br>c0qp | 4/10/90 | 106 | 59 | 80 | -13 | 40 | 4:43 | 0  | 50 |
| Find My Way / Finale                           | Sheridan Smith                    | Amazon<br>Music on<br>mobile                                     | spotify:track:<br>69TuvlfXJ9<br>UB7VwmhB<br>etgU | 8/16/10 | 117 | 41 | 47 | -8  | 38 | 4:26 | 42 | 20 |

|                                                        |                |                 |                                                  |          |     |    |    |     |    |      |    |    |
|--------------------------------------------------------|----------------|-----------------|--------------------------------------------------|----------|-----|----|----|-----|----|------|----|----|
| Fineshrine                                             | Purity Ring    | sound cloud     | spotify:track:<br>5KeyVNmqq<br>fqac1wLDse<br>K8v | 7/23/12  | 130 | 80 | 61 | -4  | 40 | 3:30 | 2  | 60 |
| Fireball                                               | Pitbull        | Apple<br>iphone | spotify:track:<br>49epIIHvgC<br>LY8HAgca<br>WrUb | 7/23/14  | 123 | 94 | 69 | -5  | 79 | 3:55 | 9  | 68 |
| Firestarter                                            | Fedde Le Grand | Spotify         | spotify:track:<br>4OA689P6G<br>bokYYksWg<br>yKKm | 7/28/17  | 107 | 94 | 71 | -5  | 72 | 3:17 | 5  | 40 |
| Firework                                               | Katy Perry     | Spotify         | spotify:track:<br>4ICv7b86sLy<br>nZbXhfScfm<br>2 | 3/12/12  | 124 | 83 | 64 | -5  | 65 | 3:48 | 14 | 73 |
| Five Hebrew Love<br>Songs: Kalá Kallá<br>(Light Bride) | Eric Whitacre  | Ipad            | spotify:track:<br>1nxLqMN5g<br>Cj4FINJm56j<br>Qw | 1/1/10   | 134 | 8  | 26 | -23 | 8  | 3:08 | 95 | 24 |
| Flash, Bang, Wallop                                    | Tommy Steele   | Ipod 4          | spotify:track:<br>0KBnDIBPw<br>4W89jBt6bm<br>Cg5 | 1/1/05   | 122 | 89 | 74 | -6  | 84 | 2:19 | 57 | 25 |
| Flaws                                                  | Bastille       | Apple<br>Music  | spotify:track:<br>0aUr2ZD1N<br>EGaPA4lbG<br>xI2I | 1/1/13   | 144 | 66 | 57 | -7  | 41 | 3:39 | 41 | 54 |
| Focus                                                  | Ariana Grande  | Spotify         | spotify:track:<br>1cdzfFjEbUb<br>gTm5nv3Fg<br>XR | 10/30/15 | 100 | 88 | 68 | -6  | 82 | 3:31 | 27 | 66 |
| Fool                                                   | BØRNS          | Spotify         | spotify:track:<br>1huRm0I1Qx<br>Vb1pJziyCS<br>Rh | 10/16/15 | 125 | 80 | 68 | -5  | 89 | 3:38 | 0  | 53 |

|                               |                          |                |                                      |          |     |    |    |     |    |      |    |    |
|-------------------------------|--------------------------|----------------|--------------------------------------|----------|-----|----|----|-----|----|------|----|----|
| For Those Below - Bonus Track | Mumford & Sons           | Spotify        | spotify:track:0yWexgCswlhwer0A1bnPz3 | 9/21/12  | 180 | 45 | 26 | -9  | 38 | 3:36 | 64 | 34 |
| For What It's Worth           | Placebo                  | Play Music     | spotify:track:3R7UvtRUySTIEBMTilk9Ee | 6/9/09   | 142 | 76 | 57 | -8  | 55 | 2:47 | 0  | 45 |
| For Whom The Bell Tolls       | J. Cole                  | Spotify        | spotify:track:3MWIVSkoLS1e66nlZ2tuWJ | 12/9/16  | 112 | 41 | 65 | -11 | 17 | 2:08 | 47 | 63 |
| Fresh Feeling                 | Eels                     | iPhone/Spotify | spotify:track:5zIMD8C7t1qiIXThhgDIpD | 1/1/01   | 94  | 73 | 76 | -8  | 51 | 3:37 | 5  | 43 |
| Frim Fram Sauce               | Diana Krall              | iPhone         | spotify:track:4KQDdFvLo9qAo3BbMenJ25 | 1/1/07   | 117 | 28 | 76 | -12 | 42 | 5:00 | 93 | 37 |
| Frosty The Snowman            | The Jackson 5            | iPod Classic   | spotify:track:5B6xt8cW58ZqAO9Z3bBUj  | 10/15/70 | 120 | 62 | 67 | -8  | 94 | 2:39 | 46 | 21 |
| Games People Play             | The Alan Parsons Project | Phone          | spotify:track:2gQsUHVFY4tpXc3AFU2meS | 11/1/80  | 132 | 68 | 72 | -11 | 69 | 4:23 | 21 | 53 |
| Get Out                       | Shlohmo                  | Spotify        | spotify:track:0liowmKvYbRnWqGN8Zybl4 | 8/9/11   | 111 | 50 | 51 | -5  | 4  | 4:37 | 82 | 27 |
| Getting Late                  | Floetry                  | iPhone         | spotify:track:0khnsS3vcqT6qngEhZCk4c | 1/1/02   | 154 | 30 | 49 | -9  | 40 | 6:47 | 26 | 49 |

|                                                                                                             |                           |                          |                                        |         |     |    |    |     |    |      |     |    |
|-------------------------------------------------------------------------------------------------------------|---------------------------|--------------------------|----------------------------------------|---------|-----|----|----|-----|----|------|-----|----|
| Girl of the north country (live)                                                                            | Bob Dylan and Johnny Cash | Youtube                  |                                        |         |     |    |    |     |    |      |     |    |
| Girls In Their Summer Clothes                                                                               | Bruce Springsteen         | Spotify                  | spotify:track:5kVSDFEAqgjKtcD6tRvRzY   | 9/25/07 | 113 | 76 | 44 | -4  | 67 | 4:19 | 3   | 45 |
| Give It to Me (Karaoke Version) - Originally Performed By Timberland Ft Nelly Furtado and Justin Timberlake | Sing Karaoke Sing         | Spotify                  | spotify:track:2oyNPKqBL ezdiNyaXEQ FvQ | 10/5/12 | 111 | 56 | 92 | -11 | 60 | 3:56 | 12  | 5  |
| Glass and Buffalo Warrior Travel                                                                            | Ryuichi Sakamoto          | Spotify                  | spotify:track:2yG7nhSqBuMhBj3I2a5k9S   | 1/7/16  | 126 | 11 | 17 | -35 | 4  | 1:51 | 97  | 29 |
| God Rests In Reason [Live]                                                                                  | Jason Mraz                | Spotify                  | spotify:track:0PSPABGF LN4D9Iqa46CQj   | 2/13/07 | 105 | 28 | 33 | -12 | 15 | 4:51 | 81  | 26 |
| Goldberg Variations, BWV 988: Aria da capo - 1981 Version                                                   | Johann Sebastian Bach     | Desktop computer/Spotify | spotify:track:1aTpzY2ggWHhPi8p2f56u1   | 8/27/02 | 135 | 1  | 44 | -37 | 28 | 3:44 | 100 | 38 |
| Golden Skans                                                                                                | Klaxons                   | Spotify                  | spotify:track:6BqWhxll86CGGE6WxgdRqG   | 1/1/07  | 142 | 84 | 47 | -3  | 77 | 2:45 | 0   | 65 |
| Gone, Gone, Gone                                                                                            | Phillip Phillips          | I Music                  | spotify:track:56sxN1yKgl dgOZXBeA HkJG | 1/1/12  | 118 | 66 | 67 | -6  | 50 | 3:30 | 14  | 47 |
| Goodbye                                                                                                     | Miley Cyrus               | iPhone music             | spotify:track:5ddXNYCr4 kbUXzRpvq A58W | 1/1/08  | 175 | 70 | 36 | -5  | 20 | 3:51 | 1   | 29 |



|                                       |                               |                            |                                      |          |     |    |    |     |    |      |    |    |
|---------------------------------------|-------------------------------|----------------------------|--------------------------------------|----------|-----|----|----|-----|----|------|----|----|
| Gravel                                | Ani DiFranco                  | samsung phone music player | spotify:track:7LjFcq4C2NGLXrSadUma79 | 2/1/98   | 139 | 58 | 76 | -9  | 86 | 3:32 | 31 | 32 |
| Great Ideas                           | Fake Laugh                    | Spotify                    | spotify:track:7f0fX8mDWKHmZorgOMqd2Q | 10/7/16  | 150 | 77 | 57 | -8  | 93 | 3:01 | 1  | 18 |
| Grown-Up Christmas List               | Amy Grant                     | iPhone                     | spotify:track:24ICPiiEWKg9K7k1Gh1h8q | 1/1/92   | 122 | 20 | 32 | -9  | 14 | 5:02 | 85 | 22 |
| Gypsy                                 | Fleetwood Mac                 | Spotify                    | spotify:track:19Ym5Sg0YyOCa6ao21bdoG | 11/21/88 | 131 | 54 | 62 | -14 | 85 | 4:25 | 2  | 69 |
| Hallelujah                            | Jeff Buckley                  | iPhone, Spotify.           | spotify:track:74X1epeRufHckhuX1KFD04 | 1/1/94   | 101 | 14 | 34 | -11 | 9  | 6:53 | 92 | 72 |
| Hand Covers Bruise                    | Trent Reznor and Atticus Ross | Shuffeld Youtube playlist  | spotify:track:1v0uVPU6BWcbog5BiWLWVa | 9/28/10  | 115 | 15 | 21 | -25 | 4  | 4:19 | 97 | 48 |
| Hanging On The Telephone              | Blondie                       | Android phone/Spotify      | spotify:track:0e17OFidbbC7GYP2KFxhct | 10/31/81 | 151 | 77 | 50 | -12 | 55 | 2:33 | 2  | 43 |
| Happy                                 | Pharrell Williams             | iPod                       | spotify:track:6NPVjNh8Jhru9xOmyQigds | 6/18/13  | 160 | 76 | 65 | -7  | 96 | 3:53 | 29 | 75 |
| Happy Little Pill (Casper Zazz Remix) | Troye Sivan                   | sound cloud                |                                      |          |     |    |    |     |    |      |    |    |
| Hard To Love                          | Old Crow Medicine Show        | iPod                       | spotify:track:2yd6XoFVvbs4x8hMTVR    | 2/10/04  | 151 | 74 | 57 | -6  | 80 | 2:31 | 63 | 34 |

|                    |                                        |                        |                                          |          |     |    |    |     |    |      |    |    |
|--------------------|----------------------------------------|------------------------|------------------------------------------|----------|-----|----|----|-----|----|------|----|----|
|                    |                                        |                        | Olx                                      |          |     |    |    |     |    |      |    |    |
| Havana Gang Brawl  | The Zutons                             | Spotify/laptop         | spotify:track:2rPTTO4BvAs9P8crblrpEa     | 1/1/04   | 160 | 89 | 49 | -6  | 45 | 4:30 | 8  | 26 |
| He Like That       | Fifth Harmony                          | Spotify                | spotify:track:1zjcIIm2fbVFmG3dsj03e      | 10/29/17 | 147 | 68 | 59 | -6  | 49 | 3:37 | 36 | 69 |
| He of the Name     | Revo                                   | Cell phone             |                                          |          |     |    |    |     |    |      |    |    |
| Heart of the City  | Guthrie Govan                          | Spotify                | spotify:track:0pcwaoBxngoFE5qIL8FDWy     | 5/13/13  | 81  | 46 | 40 | -7  | 35 | 2:00 | 1  | 38 |
| Heart Skips A Beat | Olly Murs<br>featuring Rizzle<br>Kicks | Galaxy S6 /<br>Spotify |                                          |          |     |    |    |     |    |      |    |    |
| Heartbeat          | Scouting For<br>Girls                  | iPod nano              | spotify:track:20Mf1Payc1BqR82y5zEvI0     | 9/14/07  | 155 | 86 | 56 | -4  | 86 | 2:56 | 5  | 57 |
| Heartbeat Song     | Kelly Clarkson                         | Play Music             | spotify:track:4WGgAdWVeF0ExmW<br>ow9R9XY | 3/4/16   | 149 | 80 | 49 | -4  | 49 | 3:19 | 1  | 53 |
| Heartbeats         | José González                          | Spotify/Phone          | spotify:track:3jQyadhLTxpxadQlkFh2b8     | 1/1/03   | 178 | 15 | 39 | -17 | 31 | 2:40 | 98 | 65 |
| Heaven Knows       | The Pretty<br>Reckless                 | YouTube                | spotify:track:0ifludDeWelhhKzNqP12jm     | 3/17/14  | 84  | 80 | 54 | -4  | 58 | 3:45 | 8  | 57 |
| Heaven's Knife     | Josh Garrels                           | Apple<br>Music         | spotify:track:0jLWlbEJYg                 | 4/7/15   | 183 | 26 | 25 | -9  | 22 | 3:23 | 81 | 48 |

|                                     |                          |                            |                                                  |          |     |    |    |     |    |      |    |    |
|-------------------------------------|--------------------------|----------------------------|--------------------------------------------------|----------|-----|----|----|-----|----|------|----|----|
|                                     |                          |                            | WeKnzHhvK<br>Ubz                                 |          |     |    |    |     |    |      |    |    |
| Hello                               | Beyoncé                  | iPhone<br>iTunes           | spotify:track:<br>3ID5ILzkh4u<br>M8XPUuB2<br>VKq | 11/14/08 | 98  | 77 | 33 | -6  | 42 | 4:17 | 21 | 50 |
| Hello, Dolly!                       | Louis<br>Armstrong       | iMusic                     | spotify:track:<br>1ahQsOwEQ<br>Muqh7DgUv<br>YSGN | 1/1/64   | 155 | 41 | 58 | -10 | 62 | 2:27 | 84 | 46 |
| Hello, Goodbye -<br>Remastered 2009 | The Beatles              | iPhone                     | spotify:track:<br>0vZ97gHhe<br>mKm6c64hT<br>fJNA | 11/27/67 | 99  | 73 | 48 | -9  | 81 | 3:29 | 31 | 64 |
| Helplessly Hoping -<br>Remastered   | Crosby, Stills &<br>Nash | Spotify                    | spotify:track:<br>1UKobFsdq<br>NXQb8Othi<br>mCKe | 5/29/69  | 147 | 16 | 57 | -14 | 44 | 2:38 | 91 | 67 |
| Hero                                | Family of the<br>Year    | Spotify                    | spotify:track:<br>6GRDI9suQ<br>HikFP6euIX<br>npq | 7/10/12  | 175 | 54 | 34 | -6  | 27 | 3:10 | 21 | 66 |
| High And Low                        | Empire of the<br>Sun     | Spotify                    | spotify:track:<br>34W19hCaE3<br>AzbOYT9wF<br>XLP | 10/28/16 | 127 | 77 | 51 | -5  | 32 | 3:45 | 2  | 60 |
| Higher                              | Taio Cruz                | iPod<br>touch/Spoti<br>fy  | spotify:track:<br>3IzaEzfHPfx<br>G3uolyTARn<br>y | 1/1/10   | 128 | 91 | 53 | -4  | 54 | 3:08 | 3  | 45 |
| Hips Don't Lie                      | Shakira                  | Spotify                    | spotify:track:<br>3ZFTkvIE7k<br>yPt6Nu3PEa<br>7V | 3/27/06  | 100 | 82 | 78 | -6  | 76 | 3:38 | 28 | 84 |
| Hit the Road Jack                   | Ray Charles              | iPhone-<br>iTunes<br>music | spotify:track:<br>49fzPkBb3a<br>OUWYRKa          | 2/23/12  | 173 | 62 | 61 | -12 | 94 | 1:58 | 57 | 68 |

|                                                             |                                |                           |                                                  |          |     |    |    |     |    |      |    |    |
|-------------------------------------------------------------|--------------------------------|---------------------------|--------------------------------------------------|----------|-----|----|----|-----|----|------|----|----|
|                                                             |                                |                           | TWVhm                                            |          |     |    |    |     |    |      |    |    |
| Ho Hey                                                      | The Lumineers                  | Spotify                   | spotify:track:<br>1jdNcAD8Ir<br>58RlsdGjJJd<br>x | 1/1/12   | 80  | 47 | 69 | -9  | 36 | 2:41 | 78 | 72 |
| Hold My Cock, Living<br>on a Prayer Parody<br>Bon Jovi Joke | Funny Explicit<br>Comedy Tunes | IPOD                      | spotify:track:<br>5cn2iaghfMe<br>WCjWvovI7<br>JC | 5/28/11  | 123 | 58 | 64 | -11 | 53 | 4:01 | 32 | 16 |
| Hole In My Heart                                            | Alphabeat                      | iPod touch                | spotify:track:<br>4Gnb5G5K5<br>3X7wETeaJa<br>mka | 1/1/10   | 130 | 88 | 66 | -3  | 73 | 4:09 | 16 | 24 |
| Holiday/Boulevard Of<br>Broken Dreams                       | Green Day                      | Samsung<br>music          | spotify:track:<br>0MsrWnxQZ<br>xPAcov7c74<br>sSo | 9/21/04  | 167 | 83 | 29 | -3  | 45 | 8:13 | 0  | 74 |
| Holy Ground                                                 | Taylor Swift                   | Apple<br>Music            | spotify:track:<br>3KmYVOuK<br>2eG7LGP7q<br>Q8DLR | 10/22/12 | 157 | 82 | 63 | -7  | 65 | 3:23 | 2  | 48 |
| Honey Sweet                                                 | Blossoms                       | Spotify                   | spotify:track:<br>4D2rElyYw0<br>meeh8AOXq<br>fxK | 8/5/16   | 110 | 71 | 57 | -6  | 63 | 3:36 | 3  | 59 |
| Honey Sweet                                                 | Blossoms                       | Spotify                   | spotify:track:<br>4D2rElyYw0<br>meeh8AOXq<br>fxK | 8/5/16   | 110 | 71 | 57 | -6  | 63 | 3:36 | 3  | 59 |
| Hoover Factory                                              | Elvis Costello                 | Spotify                   | spotify:track:<br>1mqOWiSlq<br>ZcXHRrC2Q<br>0Jdx | 1/1/80   | 134 | 29 | 53 | -18 | 76 | 1:44 | 76 | 15 |
| Hot Love - A Side                                           | T. Rex                         | iPhone-<br>Apple<br>Music | spotify:track:<br>1FvG5AZm6<br>8WSFQj3fJy        | 9/24/71  | 131 | 54 | 56 | -9  | 49 | 4:55 | 8  | 52 |

|                                |                       |                              |                                                  |          |     |    |    |     |    |      |    |    |
|--------------------------------|-----------------------|------------------------------|--------------------------------------------------|----------|-----|----|----|-----|----|------|----|----|
|                                |                       |                              | woy                                              |          |     |    |    |     |    |      |    |    |
| How Beautiful (Live)           | Mosaic MSC            | Spotify                      | spotify:track:<br>0J9TFCYyjL<br>HYJOcenwx<br>blB | 9/16/16  | 159 | 41 | 22 | -8  | 8  | 6:56 | 51 | 56 |
| How To Disappear<br>Completely | Radiohead             | Spotify                      | spotify:track:<br>69pwmeyvQ<br>MuHMtkCm<br>pEWhQ | 10/1/00  | 102 | 30 | 17 | -12 | 21 | 5:56 | 32 | 58 |
| How to Save a Life             | The Fray              | Spotify                      | spotify:track:<br>5fVZC9GiM<br>4e8vu99W0<br>Xf6J | 9/13/05  | 122 | 74 | 64 | -4  | 36 | 4:23 | 27 | 81 |
| human                          | Christina Perri       | Play Music                   | spotify:track:<br>1zVhMuH7a<br>gsRe6XkljIY<br>4U | 11/18/13 | 144 | 49 | 44 | -6  | 25 | 4:11 | 13 | 71 |
| Human Fly                      | The Cramps            | Android<br>phone/Spoti<br>fy | spotify:track:<br>0EIRzK07sc<br>9eszyk1ea9A<br>b | 1/1/89   | 120 | 85 | 53 | -11 | 31 | 2:16 | 4  | 53 |
| Humming                        | James Martin          | iTunes                       |                                                  |          |     |    |    |     |    |      |    |    |
| Hummingbird                    | B.B. King             | Itunes on<br>Ipod            | spotify:track:<br>0CF1X2oxb<br>HWyFNPG2<br>CPeNX | 1/1/05   | 162 | 59 | 53 | -9  | 65 | 4:41 | 53 | 51 |
| Hundred Mile High<br>City      | Ocean Colour<br>Scene | Iphone                       | spotify:track:<br>0EgOQeJ1fH<br>UyoPAkKp03<br>Hp | 1/1/97   | 112 | 94 | 42 | -4  | 70 | 3:58 | 0  | 47 |
| Hyena                          | the GazzettE          | spotify                      | spotify:track:<br>7pKVcmIJST<br>DNMt3QOY<br>rGzH | 7/4/07   | 125 | 98 | 50 | -4  | 41 | 4:16 | 0  | 24 |

|                                            |                       |                      |                                      |         |     |    |    |     |    |      |    |    |
|--------------------------------------------|-----------------------|----------------------|--------------------------------------|---------|-----|----|----|-----|----|------|----|----|
| I Believe In You - 1997 Remastered Version | Talk Talk             | Spotify              | spotify:track:3SzoVeS9Eaxt6dmfXF0fPo | 1/1/88  | 91  | 19 | 52 | -22 | 16 | 6:10 | 69 | 38 |
| I Could Die For You                        | Red Hot Chili Peppers | Laptop iTunes        | spotify:track:3oP2vxUR2bjFCrU9YoGnM  | 7/9/02  | 170 | 73 | 38 | -4  | 39 | 3:13 | 10 | 54 |
| I Feel A Change Coming On                  | Michel Montecrossa    | Ipod                 | spotify:track:3G1sfbV448J36wqmpEITbt | 2/20/10 | 140 | 64 | 42 | -7  | 39 | 5:36 | 18 | 0  |
| I Know A Place                             | MUNA                  | Iphone / Spotify     | spotify:track:0bPSRn4crnh5f1JhELPlyL | 2/3/17  | 112 | 90 | 69 | -5  | 78 | 4:33 | 14 | 57 |
| I Like The View                            | Lil Wayne             | Sony                 | spotify:track:6Arm9x83wtStSfxAQ3pnjJ | 1/1/11  | 96  | 85 | 52 | -6  | 39 | 4:41 | 0  | 39 |
| I Love It Loud (Broadcast 1988)            | KISS                  | iPhone               | spotify:track:7yDrK11J4VWNbR4aLU3qJ7 |         |     |    |    |     |    |      |    |    |
| I See My Mother                            | POLIÇA                | Apple Music / Iphone | spotify:track:4Q8c40BEovg8KXHfo28rhn | 4/30/12 | 130 | 72 | 66 | -9  | 26 | 4:26 | 1  | 25 |
| I Surrender                                | Rainbow               | Spotify              | spotify:track:0gGJO7JM51uAUu7EE21xx6 | 1/1/81  | 133 | 86 | 50 | -5  | 78 | 4:02 | 16 | 54 |
| I Wanna Feel - Radio Edit                  | Secondcity            | Spotify              | spotify:track:77jaOS5YDCDGPTo5Pomi4h | 5/23/14 | 122 | 90 | 69 | -6  | 80 | 3:06 | 8  | 61 |

|                             |                         |                          |                                                  |          |     |    |    |     |    |      |    |    |
|-----------------------------|-------------------------|--------------------------|--------------------------------------------------|----------|-----|----|----|-----|----|------|----|----|
| I Wasn't Worried            | Julia Nunes             | iPhone 5S<br>(Music app) | spotify:track:<br>6i3t5gEzbPw<br>2Gt8aTGqrQ<br>V | 2/28/12  | 78  | 14 | 34 | -12 | 11 | 0:57 | 96 | 16 |
| I Will Always Love<br>You   | Whitney<br>Houston      | Spotify                  | spotify:track:<br>4eHbdreAnS<br>OrDDsFfc4F<br>pm | 11/17/92 | 67  | 21 | 31 | -13 | 11 | 4:31 | 84 | 75 |
| I Will Remember             | Toto                    | AGPTEK<br>MP3 Player     | spotify:track:<br>1MzFmVDSL<br>7Vm00f3Hw<br>4Xfx | 5/1/95   | 98  | 51 | 65 | -9  | 45 | 6:06 | 15 | 53 |
| I Won't Back Down           | Tom Petty               | Spotify                  | spotify:track:<br>0Ir0Esfpcg0<br>EB6Kq8Vbb<br>Ah | 1/1/89   | 114 | 47 | 77 | -14 | 96 | 2:56 | 4  | 62 |
| I Would Like                | Zara Larsson            | Itunes                   | spotify:track:<br>0k9gqa8mjV<br>MeoFuGIsud<br>tY | 3/17/17  | 121 | 71 | 49 | -4  | 30 | 3:47 | 9  | 57 |
| I'll Be There               | The Parlotones          | iPod                     | spotify:track:<br>2ZgRR5h16<br>TOLXFLYq<br>XgJ8e | 6/1/05   | 184 | 58 | 33 | -7  | 25 | 3:39 | 48 | 26 |
| I'm a Little Teapot         | Nursery Rhyme<br>Street | iphone                   | spotify:track:<br>00F4r5l7tBB<br>ugtSq4AVR<br>MJ | 1/22/16  | 199 | 7  | 64 | -16 | 79 | 0:43 | 80 | 11 |
| I'm Good - Radio<br>Version | Blaque                  | iPod Touch               | spotify:track:<br>7EgG37pjxw<br>0Y4GHwjK3<br>CBS | 9/2/03   | 103 | 80 | 66 | -5  | 71 | 3:36 | 3  | 48 |
| I'm Not Ready               | Yeek                    | Soundcloud               | spotify:track:<br>6z3fmpMqg<br>V3a8DYZgdi<br>U7w | 12/10/15 | 120 | 72 | 80 | -5  | 56 | 4:06 | 4  | 49 |

|                                                                                  |                                                     |                           |                                                  |          |     |    |    |     |    |      |    |    |
|----------------------------------------------------------------------------------|-----------------------------------------------------|---------------------------|--------------------------------------------------|----------|-----|----|----|-----|----|------|----|----|
| I'm Not That Girl -<br>From "Wicked"<br>Original Broadway<br>Cast Recording/2003 | Idina Menzel                                        | Spotify                   | spotify:track:<br>6J2ZT1S0t9k<br>MGQQJUIK<br>QJz | 1/1/04   | 77  | 7  | 25 | -19 | 20 | 2:59 | 95 | 48 |
| Identity                                                                         | Ska Cubano                                          | ipod classic              |                                                  |          |     |    |    |     |    |      |    |    |
| If I Can Dream                                                                   | Elvis Presley                                       | Spotify                   | spotify:track:<br>5UR5aIbcfE<br>divfsPin8G4<br>5 | 10/30/15 | 188 | 71 | 17 | -7  | 34 | 3:12 | 24 | 42 |
| Ignition - Remix                                                                 | R. Kelly                                            | i tunes                   | spotify:track:<br>5dNfHmqgr1<br>28gMY2tc5C<br>eJ | 1/1/03   | 133 | 52 | 80 | -7  | 86 | 3:06 | 6  | 75 |
| Il Volo                                                                          | Relajante X                                         | Spotify                   | spotify:track:<br>2oCyRkpbb3<br>8088y39rEZ<br>NZ | 9/21/16  | 87  | 5  | 15 | -24 | 4  | 2:34 | 91 | 13 |
| Imagine - Remastered<br>2010                                                     | John Lennon                                         | iTunes                    | spotify:track:<br>7pKfPomDE<br>eI4TPT6EO<br>Yjn9 | 9/9/71   | 76  | 26 | 55 | -12 | 17 | 3:08 | 91 | 76 |
| In My Head                                                                       | Jason Derulo                                        | Spotify                   | spotify:track:<br>6St9IR6dhV2<br>tpCNVz7qfr<br>S | 2/26/10  | 110 | 75 | 76 | -4  | 85 | 3:19 | 3  | 70 |
| In the End                                                                       | Passenger                                           | I pad                     | spotify:track:<br>6dO5oQiCC<br>vciPZOIUNE<br>mb6 | 7/28/17  | 83  | 12 | 60 | -17 | 26 | 3:05 | 77 | 48 |
| Inside the suitcase                                                              | From Magical<br>Beasts and<br>Where to Find<br>Them | iPhone<br>itunes          |                                                  |          |     |    |    |     |    |      |    |    |
| Interested in Music                                                              | Adam Green                                          | Phone,<br>Amazon<br>Music | spotify:track:<br>3jeUy1caCB<br>qmZ7pcR1r        | 4/29/16  | 94  | 79 | 71 | -7  | 91 | 1:16 | 7  | 16 |



|                                                                                                      |                                                                                                              |                                    |                                                  |         |     |    |    |     |    |      |    |    |
|------------------------------------------------------------------------------------------------------|--------------------------------------------------------------------------------------------------------------|------------------------------------|--------------------------------------------------|---------|-----|----|----|-----|----|------|----|----|
|                                                                                                      |                                                                                                              |                                    | GVp                                              |         |     |    |    |     |    |      |    |    |
| Into The Wild                                                                                        | LP                                                                                                           | Spotify                            | spotify:track:<br>2gY0Ff8dmJ<br>NICyQxDDq<br>BEf | 8/25/17 | 144 | 92 | 55 | -4  | 24 | 3:55 | 4  | 55 |
| Intoxicated - Radio Edit                                                                             | Martin Solveig                                                                                               | Spotify                            | spotify:track:<br>5ZKqR1bepr<br>J3wa6wGUw<br>TWH | 5/18/15 | 125 | 68 | 81 | -4  | 47 | 2:41 | 1  | 63 |
| Introduction and Variations on Trockne Blumen from Die schone Mullerin, Op. 160, D. 802: Variation 4 | Franz Schubert                                                                                               | iTunes on laptop                   | spotify:track:<br>6bfXK8C4W<br>855X25sgKp<br>D6i | 3/31/09 | 95  | 8  | 33 | -20 | 27 | 1:47 | 99 | 4  |
| Introduzione (Andante non troppo -- Allegro vivace) from Bartok's Concerto for Orchestra             | erbert von Karajan (...and an orchestra! I can't remember anymore and it doesn't say...Berlin Phil perhaps?) | iPod                               |                                                  |         |     |    |    |     |    |      |    |    |
| Invisible Touch - Remastered 2007                                                                    | Genesis                                                                                                      | Spotify                            | spotify:track:<br>480dDrqG7L<br>O6qDaphHe<br>XIM | 6/9/86  | 131 | 94 | 62 | -6  | 84 | 3:30 | 20 | 63 |
| Issues                                                                                               | Julia Michaels                                                                                               | iPhone 6                           | spotify:track:<br>0xG0SHshC<br>StMEyNbNC<br>5d4k | 7/28/17 | 114 | 42 | 69 | -7  | 45 | 2:56 | 39 | 75 |
| It Ain't Necessarily So                                                                              | Brian Wilson                                                                                                 | default player on Lg Android phone | spotify:track:<br>7v4184qZkpj<br>KG7bITGOG<br>xj | 1/1/10  | 84  | 43 | 50 | -9  | 51 | 3:58 | 48 | 4  |

|                                                                                    |                                               |                                                            |                                      |          |     |    |    |     |    |      |    |    |
|------------------------------------------------------------------------------------|-----------------------------------------------|------------------------------------------------------------|--------------------------------------|----------|-----|----|----|-----|----|------|----|----|
| It Could Happen To You                                                             | Miles Davis Quintet                           | spotify                                                    | spotify:track:34xixFi5y3I5FIOH1ZWisx | 1/1/58   | 94  | 40 | 62 | -11 | 63 | 6:37 | 45 | 32 |
| It Just Won't Do - Radio Edit                                                      | Tim Deluxe                                    | iPhone                                                     | spotify:track:6Ss1QOGzn0iG8hrRRSGrr9 | 11/28/11 | 130 | 94 | 68 | -5  | 88 | 3:18 | 0  | 53 |
| It Was A Very Good Year (with Willie Nelson)                                       | Ray Charles                                   | iPod                                                       | spotify:track:3kIDKws1sU7Th1htqC5iDO | 8/30/04  | 94  | 18 | 23 | -12 | 6  | 5:00 | 85 | 26 |
| It's A Vibe                                                                        | 2 Chainz                                      | Spotify                                                    | spotify:track:6H0AwSQ20mo62jGIPGB8S6 | 6/16/17  | 73  | 51 | 82 | -7  | 52 | 3:30 | 3  | 79 |
| It's Teavee Time                                                                   | Charlie and the Chocolate Factory the Musical | Iphone Music                                               |                                      |          |     |    |    |     |    |      |    |    |
| Jingle Bells                                                                       | Diana Krall                                   | Iphone music app                                           | spotify:track:6Kr6DLRJA1SeOo9EI9t0G  | 1/1/05   | 101 | 55 | 71 | -6  | 58 | 3:26 | 37 | 22 |
| Joy - Remix                                                                        | Rend Collective                               | Mobiel Phone (Vodafone Smart Ultra 6) usign Play Music app | spotify:track:3r1xR1865rc7h4C6DmUPpL | 3/17/14  | 128 | 82 | 57 | -6  | 62 | 4:26 | 0  | 18 |
| Just Hold on (Originally by Steve Aoki and Louis Tomlinson) - Instrumental Version | Karaoke Freaks                                | Spotify                                                    | spotify:track:1C1ehFaI6h75Lg74pXiyjW | 12/13/16 | 116 | 58 | 65 | -12 | 13 | 3:14 | 0  | 11 |

|                                                                              |                           |                            |                                                  |         |     |    |    |     |    |      |    |    |
|------------------------------------------------------------------------------|---------------------------|----------------------------|--------------------------------------------------|---------|-----|----|----|-----|----|------|----|----|
| Just Hold on<br>(Originally Performed<br>By Louis Tomlinson<br>& Steve Aoki) | Sunfly Karaoke            | Spotify                    | spotify:track:<br>3XxfyVPICz<br>wFvrqcmGn<br>Xmb | 1/25/17 | 115 | 74 | 70 | -6  | 38 | 3:19 | 0  | 0  |
| Just Looking                                                                 | Stereophonics             | Sonos                      | spotify:track:<br>1vltPOVBSb<br>4Ib1JNVAfT<br>Yv | 1/1/99  | 100 | 49 | 34 | -6  | 4  | 4:13 | 13 | 48 |
| Kaleidoscope                                                                 | Urban Rescue              | Spotify                    | spotify:track:<br>75dL1cqk3o<br>qV1QP3NNa<br>Odv | 5/6/16  | 110 | 95 | 52 | -7  | 36 | 3:57 | 0  | 39 |
| Keep On                                                                      | Kehlani                   | Apple<br>music             | spotify:track:<br>4MV4wa3Dk<br>e1GMBtk06<br>GMR0 | 1/27/17 | 98  | 45 | 74 | -8  | 51 | 3:29 | 26 | 69 |
| Keep You in Mind -<br>Remix                                                  | Guordan Banks             | iPhone/Mus<br>ic           | spotify:track:<br>5uKryGXIP<br>Ncs1hq7nCb<br>Ve  | 11/2/16 | 168 | 66 | 53 | -6  | 38 | 4:26 | 41 | 49 |
| Keeper                                                                       | With<br>Confidence        | Itunes                     | spotify:track:<br>7C1aLb3VN<br>8Y5r3btsMB<br>kwB | 6/17/16 | 197 | 94 | 41 | -4  | 61 | 2:41 | 0  | 52 |
| Keyboard Sonatina in<br>D Minor, HWV 581                                     | George Frideric<br>Handel | Windows<br>media<br>player | spotify:track:<br>0RS5oWPJ2<br>3MuDgo0bG<br>C8KK | 1/1/16  | 82  | 78 | 31 | -10 | 96 | 1:38 | 92 | 3  |
| Killing Me Softly with<br>His Song                                           | Fugees                    | Iphone                     | spotify:track:<br>1MAqR81Tz<br>28IIqMJ2KU<br>DAO | 1/1/96  | 92  | 29 | 77 | -17 | 51 | 4:59 | 3  | 73 |
| King & Country                                                               | Seth Lakeman              | ITunes                     | spotify:track:<br>6bJC82TCv4<br>CF2b7o4k1T<br>Gc | 8/15/06 | 145 | 44 | 64 | -8  | 52 | 4:27 | 82 | 23 |

|                                                                                                                                        |                   |                                    |                                      |          |     |    |    |     |    |       |    |    |
|----------------------------------------------------------------------------------------------------------------------------------------|-------------------|------------------------------------|--------------------------------------|----------|-----|----|----|-----|----|-------|----|----|
| King Of The Mountain                                                                                                                   | Kate Bush         | Google Play Music on Android phone | spotify:track:7u62wiKKB55AAbHjJa5RPV | 10/3/05  | 150 | 50 | 58 | -12 | 61 | 4:54  | 38 | 36 |
| Kinky Afro                                                                                                                             | Happy Mondays     | Spotify                            | spotify:track:2ItPID4dgSL1t1ZbZCrg5S | 1/1/99   | 118 | 76 | 55 | -13 | 72 | 3:59  | 0  | 55 |
| Kitchen Sink - Bonus Track                                                                                                             | Twenty One Pilots | Play Music                         | spotify:track:0SUiF6BG2OPfqrIag9vIM  | 1/4/13   | 120 | 59 | 65 | -8  | 51 | 5:34  | 46 | 49 |
| L-O-V-E - Long Version                                                                                                                 | Joss Stone        | spotify                            | spotify:track:4MymCsjbOkhuP2kWNSZgLo | 1/1/11   | 95  | 78 | 53 | -6  | 65 | 2:49  | 38 | 54 |
| La mer                                                                                                                                 | Charles Trenet    | Spotify                            | spotify:track:7sZSe99XSTu5KpYJETHvWr | 6/25/90  | 69  | 17 | 22 | -16 | 55 | 3:22  | 97 | 57 |
| La sonnambula: Oh! Se una volta sola rivederlo io potessi - Ah! Non credea mirarti - Ah! Non giunge uman pensiero - From La Sonnambula | Vincenzo Bellini  | Ipod                               | spotify:track:0ilzA0mO7aYterGE9xMXZB | 6/10/11  | 70  | 10 | 23 | -20 | 4  | 14:12 | 98 | 1  |
| La Vida Es Limonada [Radio Mix]                                                                                                        | Marquess          | Spotify                            | spotify:track:4t6g5Dd52NljBIwzlsvdp1 | 6/20/08  | 120 | 90 | 64 | -6  | 92 | 3:29  | 6  | 26 |
| Laid Back                                                                                                                              | Big Fin           | iTunes                             |                                      |          |     |    |    |     |    |       |    |    |
| Lambada - Original Version 1989                                                                                                        | Kaoma             | Spotify                            | spotify:track:6xepovPqjvrkEw9Y5AMmTm | 11/13/07 | 119 | 80 | 76 | -5  | 97 | 3:27  | 21 | 64 |

|                                |                                 |                  |                                      |          |     |    |    |     |    |      |    |    |
|--------------------------------|---------------------------------|------------------|--------------------------------------|----------|-----|----|----|-----|----|------|----|----|
| Land of Nod - Lack of Afro Mix | The New Mastersounds            | iTunes           | spotify:track:1k1PdCcY8XA58B8yyZMLpC | 11/12/07 | 108 | 90 | 75 | -7  | 42 | 3:50 | 11 | 10 |
| Landslide                      | Fleetwood Mac                   | Computer/Spotify | spotify:track:5ihS6UUlyQAfmp48eSkxuQ | 7/11/75  | 159 | 16 | 41 | -22 | 42 | 3:19 | 88 | 75 |
| Lansana's Priestess            | Donald Byrd                     | Spotify app      | spotify:track:6e0UKhWk7vZFPEgRLVUNDg | 1/1/73   | 117 | 88 | 48 | -9  | 89 | 7:39 | 26 | 47 |
| Larger Than Life               | Backstreet Boys                 | iPod Classic     | spotify:track:6sbXGUn9V9ZaLwLdOfpKRE | 5/18/99  | 108 | 97 | 66 | -3  | 75 | 3:53 | 11 | 66 |
| Laura Palmer                   | Bastille                        | iPhone 6         | spotify:track:0VszWViF3bhfCvxhDVC3aM | 1/1/13   | 135 | 79 | 57 | -5  | 37 | 3:06 | 2  | 50 |
| Lay Me Down                    | Sam Smith                       | iPad             | spotify:track:64GRDrL1efgXclrhVCeuA0 | 11/6/15  | 125 | 19 | 47 | -11 | 33 | 3:40 | 92 | 77 |
| Learning To Fly                | Tom Petty and the Heartbreakers | IPhone           | spotify:track:17S4XrLvF5jlGvGCJHgF51 | 1/1/91   | 117 | 77 | 65 | -10 | 95 | 4:02 | 21 | 66 |
| Legacy Of Tudors               | Serenity                        | Spotify          | spotify:track:4asjRo9SsNqVWMJ8vysBpC | 8/1/13   | 160 | 94 | 46 | -2  | 41 | 5:02 | 0  | 4  |
| Legend Has It                  | Run The Jewels                  | Spotify          | spotify:track:6bGwloiyyHXwFZ4yV1zjqR | 12/26/16 | 121 | 56 | 83 | -7  | 47 | 3:26 | 3  | 58 |

|                                                        |               |              |                                                  |          |     |    |    |     |    |      |    |    |
|--------------------------------------------------------|---------------|--------------|--------------------------------------------------|----------|-----|----|----|-----|----|------|----|----|
| LEMONADE                                               | SOPHIE        | Spotify      | spotify:track:<br>4rcxSQEuGn<br>8ZXvFtbcN<br>DGZ | 11/27/15 | 71  | 65 | 83 | -5  | 84 | 1:59 | 30 | 45 |
| Let Everything That<br>Has Breath                      | Matt Redman   | iTunes       | spotify:track:<br>3eFti0TnNR<br>LlfgiWu0Wo<br>Xo | 4/25/10  | 118 | 90 | 49 | -6  | 28 | 4:26 | 0  | 23 |
| Let It Be - Remastered<br>2009                         | The Beatles   | iMusic       | spotify:track:<br>7iN1s7xHE4i<br>fF5povM6A4<br>8 | 5/8/70   | 143 | 40 | 44 | -8  | 41 | 4:03 | 63 | 76 |
| Let It Go                                              | James Bay     | Spotify      | spotify:track:<br>40EB7ABU<br>O6MoWMU<br>wPKptJ7 | 3/23/15  | 147 | 31 | 55 | -10 | 25 | 4:21 | 82 | 69 |
| Let Me Love You -<br>Tropkillaz & Mc<br>Livinho Remix  | DJ Snake      | Spotify      | spotify:track:<br>6hLyfWFe42<br>YtHONpJZD<br>t4p | 12/19/16 | 100 | 87 | 66 | -5  | 33 | 3:36 | 6  | 42 |
| Let's Work                                             | Prince        | ipod classic | spotify:track:<br>0wgVCOPX<br>v9YSgmRij<br>mDSkh | 10/14/81 | 120 | 44 | 82 | -15 | 90 | 3:55 | 1  | 36 |
| Let's Work Together -<br>Long Version / Bonus<br>Track | Canned Heat   | iTunes       | spotify:track:<br>7vJaNv4ItDy<br>YXXCVRJre<br>h6 | 8/3/70   | 119 | 71 | 75 | -12 | 87 | 3:14 | 12 | 49 |
| Life Is Just A Bowl Of<br>Cherries                     | Johnny Mathis | Spotify      | spotify:track:<br>5NVrv0B0Xt<br>MLxXYoX9t<br>oww | 1/1/04   | 105 | 41 | 52 | -10 | 32 | 2:45 | 84 | 10 |
| Life On Mars? - 2015<br>Remastered Version             | David Bowie   | Spotify      | spotify:track:<br>3ZE3wv8V3<br>w2T2f7nOCj<br>V0N | 12/17/71 | 123 | 38 | 44 | -15 | 22 | 3:56 | 64 | 71 |

|                                 |                        |                   |                                                  |         |     |    |    |     |    |      |    |    |
|---------------------------------|------------------------|-------------------|--------------------------------------------------|---------|-----|----|----|-----|----|------|----|----|
| LIFTED                          | CL                     | Spotify           | spotify:track:<br>2DHWM8B<br>m4zuzuH7U<br>OXscJw | 8/19/16 | 181 | 70 | 37 | -4  | 28 | 2:55 | 0  | 56 |
| Little Boxes                    | Walk Off the<br>Earth  | iPhone            | spotify:track:<br>5jZkMJRsEu<br>4naluh7VjiV<br>B | 7/6/15  | 120 | 40 | 84 | -11 | 71 | 1:53 | 85 | 40 |
| Little Fluffy Clouds            | The Orb                | iPod              | spotify:track:<br>7FVvHGA46<br>aU7mkwx4i<br>HMRE | 4/2/91  | 105 | 54 | 66 | -18 | 54 | 4:27 | 1  | 42 |
| Livin' On The Edge              | Aerosmith              | Phone             | spotify:track:<br>4avSaixVwu<br>8uqfSs7zgoj3     | 1/1/93  | 85  | 88 | 40 | -4  | 27 | 6:21 | 0  | 57 |
| Living Fantasy                  | Clark                  | iphone 6          | spotify:track:<br>21axGBCC9<br>So7Hlfbfrvz3<br>T | 4/7/17  | 160 | 77 | 59 | -8  | 67 | 4:07 | 12 | 28 |
| Living In The Moment            | Jason Mraz             | iTunes            | spotify:track:<br>395XDt5vt8<br>DKguJDjGt<br>YLU | 4/13/12 | 84  | 63 | 65 | -7  | 70 | 3:55 | 5  | 53 |
| Løb Stop Stå (feat.<br>Coco O.) | Boom Clap<br>Bachelors | Spotify           | spotify:track:<br>4SsNEB3KY<br>HRyGrpJhi2<br>Ddd | 4/26/11 | 94  | 34 | 49 | -14 | 28 | 4:49 | 86 | 45 |
| Locked Out Of<br>Heaven         | Bruno Mars             | Spotify           | spotify:track:<br>3w3y8KPTf<br>NeOKPiqUT<br>akBh | 12/7/12 | 144 | 70 | 73 | -4  | 87 | 3:53 | 5  | 79 |
| Longe da te cor moi             | Claudio<br>Monteverdi  | Spotify           | spotify:track:<br>5vgnbmKki<br>msNcQKCxf<br>joJf | 1/1/99  | 67  | 2  | 17 | -29 | 4  | 2:46 | 98 | 1  |
| Look Wot You Dun                | Steve Overland         | Samsung<br>tablet | spotify:track:<br>50hSOIgrtK4                    | 1/1/01  | 90  | 70 | 66 | -8  | 95 | 3:14 | 18 | 8  |

|                                                      |                        |                    |                                      |          |     |    |    |    |    |      |    |    |
|------------------------------------------------------|------------------------|--------------------|--------------------------------------|----------|-----|----|----|----|----|------|----|----|
|                                                      |                        |                    | MlpURmgE89z                          |          |     |    |    |    |    |      |    |    |
| Lord of Eternity                                     | Fernando Ortega        | I tunes on I mac   | spotify:track:1HFTMNSMsDchQ50oTXhujK | 8/5/14   | 161 | 41 | 39 | -9 | 15 | 4:33 | 70 | 17 |
| Lost                                                 | KT Tunstall            | Spotify            | spotify:track:4lQzPwJQKLryQjdHBFzE11 | 1/1/10   | 140 | 53 | 47 | -7 | 18 | 4:41 | 33 | 24 |
| Lost Mind (big band version)                         | Herman Brood           | Laptop             |                                      |          |     |    |    |    |    |      |    |    |
| Love Gangster                                        | Beth Hart              | Spotify            | spotify:track:5WF9Nvo2y3SpxlWvvibnmo | 10/14/16 | 113 | 65 | 65 | -5 | 37 | 4:10 | 9  | 33 |
| Love Is a Stranger (Eurythmics)                      | The Plastic FanTastics | iPad               | spotify:track:4qT2Tfk4TJir55vdh0YAZ4 | 7/4/11   | 127 | 79 | 63 | -7 | 16 | 3:54 | 0  | 1  |
| Love Is Stronger Than Justice (The Munificent Seven) | Sting                  | iPhone (iTunes)    | spotify:track:2DXYjzsMEV6Kvb3Q61Y0M0 | 3/9/93   | 166 | 78 | 54 | -8 | 78 | 5:11 | 6  | 34 |
| Love Me Now                                          | John Legend            | Music on my iPhone | spotify:track:6nxQdXa1uAL0rY72wPZu89 | 12/2/16  | 124 | 76 | 49 | -4 | 71 | 3:30 | 59 | 69 |
| Love My Life                                         | Robbie Williams        | Laptop             | spotify:track:1YW369EbVyjpeLE3YbsjKQ | 11/4/16  | 96  | 69 | 54 | -7 | 38 | 3:28 | 1  | 62 |
| Love on the Weekend                                  | John Mayer             | Spotify            | spotify:track:0j2WBxWZnWti5TpSxjJvPb | 11/17/16 | 120 | 55 | 73 | -9 | 41 | 3:33 | 55 | 67 |



|                                                                                  |                           |                           |                                      |         |     |    |    |     |    |      |    |    |
|----------------------------------------------------------------------------------|---------------------------|---------------------------|--------------------------------------|---------|-----|----|----|-----|----|------|----|----|
| Love The Fear - Tom Fall Remix                                                   | Temple One                | Spotify                   | spotify:track:3Hp2oV0SDukUTcJunXC4QL | 2/2/12  | 128 | 84 | 58 | -4  | 36 | 7:00 | 1  | 4  |
| Love The Way You Lie (Made Famous by Eminem and Rihanna)                         | Smooth Jazz All Stars     | iPhone, music             | spotify:track:6awsla6j83x2jFPpet4d1V | 2/8/11  | 174 | 46 | 55 | -10 | 33 | 3:40 | 67 | 16 |
| Lover Boy                                                                        | MIKA                      | Spotify                   | spotify:track:5u3i2xrCK6qC78dv1yX9zF | 1/1/09  | 127 | 75 | 68 | -7  | 72 | 3:13 | 45 | 27 |
| Lovesick                                                                         | Flume                     | Laptop                    |                                      |         |     |    |    |     |    |      |    |    |
| Made In The USA                                                                  | Demi Lovato               | iTunes (on laptop)        | spotify:track:4A4jWRGo7pRJ8hPLC9xVoG | 1/1/13  | 88  | 87 | 58 | -4  | 63 | 3:16 | 0  | 42 |
| Making Christmas                                                                 | The Citizens of Halloween | Spotify                   | spotify:track:208rmXdjs6mywkQRQw0xni | 1/1/93  | 140 | 32 | 56 | -16 | 28 | 3:58 | 68 | 29 |
| Mama's Gun                                                                       | Glass Animals             | Deezer                    | spotify:track:5o4znEHwozOHlgHoWAlnr  | 8/26/16 | 90  | 31 | 46 | -10 | 22 | 4:27 | 70 | 56 |
| March Of The Witch Hunters - From "Wicked" Original Broadway Cast Recording/2003 | Christopher Fitzgerald    | Android/Google Play Music | spotify:track:1i74LECmLTK8uH3k2Z9BJa | 1/1/04  | 115 | 67 | 58 | -8  | 69 | 1:31 | 68 | 38 |
| Mardy Bum                                                                        | Arctic Monkeys            | Spotify                   | spotify:track:2fyIS6GXMgUcSv4oejx63f | 1/29/06 | 112 | 60 | 63 | -5  | 31 | 2:55 | 3  | 72 |
| Marilyn Monroe                                                                   | Pharrell Williams         | iPhone 6/Spotify          | spotify:track:1AvXB7pTYb7irnDLRfE    | 3/3/14  | 117 | 59 | 88 | -9  | 62 | 5:52 | 6  | 57 |

|                                    |                |                   |                                      |          |     |    |    |     |    |      |    |    |
|------------------------------------|----------------|-------------------|--------------------------------------|----------|-----|----|----|-----|----|------|----|----|
|                                    |                |                   | 27H                                  |          |     |    |    |     |    |      |    |    |
| Marvin Gaye (feat. Meghan Trainor) | Charlie Puth   | iTunes            | spotify:track:3MWGICKyH4nILtXRnE9gd7 | 11/5/15  | 110 | 62 | 80 | -5  | 82 | 3:10 | 42 | 54 |
| Mary, Mary                         | Run-D.M.C.     | Ipod Classic      | spotify:track:3jmhbFdiHvAf1EGmveAHkU | 9/16/88  | 115 | 88 | 89 | -6  | 93 | 3:15 | 0  | 38 |
| Me and Bobby McGee                 | Janis Joplin   | Amazon Music      | spotify:track:1IqFh00G2kvvMm8pRMpehA | 1/11/71  | 93  | 46 | 45 | -11 | 66 | 4:31 | 30 | 70 |
| Memories (feat. Kid Cudi)          | David Guetta   | Spotify           | spotify:track:5xYC48nOpVemY6U5GRGTb  | 11/22/10 | 130 | 92 | 55 | -4  | 38 | 3:31 | 0  | 65 |
| Mercy                              | Shawn Mendes   | Spotify           | spotify:track:0AS63m1wHv9n4VVRizK6Hc | 4/20/17  | 148 | 66 | 56 | -5  | 36 | 3:29 | 13 | 80 |
| Mesmerise                          | Temples        | Spotify           | spotify:track:7H2MzfDoJVlhDUuWfDsaRQ | 2/10/14  | 136 | 78 | 38 | -6  | 52 | 3:42 | 0  | 34 |
| Miracle of Life                    | Walk on Fire   | AGPTEK MP3 player |                                      |          |     |    |    |     |    |      |    |    |
| Miss Right                         | Anderson .Paak | Spotify           | spotify:track:4it9okpXUNL0haiYRxfU0q | 8/28/15  | 96  | 53 | 82 | -7  | 71 | 3:19 | 0  | 51 |
| Missing You                        | All Time Low   | Spotify           | spotify:track:0c2yZp1tTYAUiKraMdS8Yg | 4/3/15   | 100 | 73 | 56 | -6  | 40 | 4:05 | 5  | 64 |

|                               |                   |                            |                                      |          |     |    |    |     |    |      |    |    |
|-------------------------------|-------------------|----------------------------|--------------------------------------|----------|-----|----|----|-----|----|------|----|----|
| Mixed Drinks About Feelings   | Eric Church       | Samsung S6 Music           | spotify:track:1EnoCmQSpJaiCyA3Kr87XG | 11/11/15 | 136 | 22 | 71 | -13 | 42 | 2:58 | 52 | 54 |
| Mo Hotta Mo Betta             | The Baseballs     | Ipod                       | spotify:track:3M0kMeCRbeo3SHbr9CKc2t | 3/7/14   | 82  | 83 | 64 | -5  | 96 | 3:01 | 47 | 11 |
| Money Power Fame - Remastered | DON BROCO         | Ipod Classic               | spotify:track:1Ue0sFVGnKM8N8PUeFYMFw | 8/7/15   | 97  | 89 | 61 | -3  | 69 | 3:23 | 0  | 45 |
| Monkey Wrench                 | Foo Fighters      | Windows Phone/Groove Music | spotify:track:44wXefe8WB9Fd6xwtmAwBR | 5/20/97  | 174 | 95 | 40 | -4  | 56 | 3:51 | 0  | 68 |
| Monsters of Sunderland        | British Sea Power | Spotify                    | spotify:track:1E4JCH45a0Hk5wZeVUh2wW | 4/1/13   | 173 | 74 | 30 | -6  | 38 | 3:10 | 1  | 15 |
| Moonbeam Levels               | Prince            | Ipod                       | spotify:track:4i209ifm3SMgm9AQy8aMTY | 11/22/16 | 76  | 51 | 61 | -10 | 51 | 4:06 | 63 | 28 |
| Morning                       | Beck              | Spotify                    | spotify:track:65tH2GPMFCt8JtM2PM3MiX | 1/1/14   | 114 | 36 | 55 | -10 | 27 | 5:20 | 47 | 54 |
| Motivational Speaker          | Cowtown           | Spotify                    | spotify:track:3t7eqck05Ir4QoSDbTmTzu | 8/19/16  | 98  | 89 | 49 | -8  | 76 | 2:35 | 0  | 7  |
| Mountain To Move              | Nick Mulvey       | Spotify                    | spotify:track:7zGyIkunvMO11FBYe93lzZ | 9/8/17   | 110 | 95 | 66 | -6  | 31 | 3:56 | 43 | 56 |

|                                                        |                                           |                                 |                                        |          |     |    |    |     |    |      |    |    |
|--------------------------------------------------------|-------------------------------------------|---------------------------------|----------------------------------------|----------|-----|----|----|-----|----|------|----|----|
| Move Down South                                        | James                                     | Apple ipod touch 6th generation | spotify:track:2TGCmCvCNy3pnWA9WxwqCu   | 3/18/16  | 135 | 84 | 45 | -6  | 28 | 5:19 | 0  | 28 |
| Moves                                                  | Big Sean                                  | Spotify                         | spotify:track:0Fv5N0cHBs14bzCbollCAS   | 2/3/17   | 76  | 53 | 79 | -6  | 37 | 2:23 | 5  | 73 |
| Movies                                                 | Alien Ant Farm                            | Spotify                         | spotify:track:0DVxWV6V1nWa7Ml68Frd3D   | 1/1/01   | 113 | 92 | 55 | -5  | 53 | 3:16 | 0  | 59 |
| Mr. Brightside                                         | The Killers                               | Ipod                            | spotify:track:3n3Ppam7vgaVa1iaRUc9Lp   | 1/1/04   | 148 | 92 | 36 | -4  | 24 | 3:42 | 0  | 81 |
| Mr. Brightside                                         | The Killers                               | Phone                           | spotify:track:3n3Ppam7vgaVa1iaRUc9Lp   | 1/1/04   | 148 | 92 | 36 | -4  | 24 | 3:42 | 0  | 81 |
| Mr. Brightside                                         | The Killers                               | Spotify                         | spotify:track:3n3Ppam7vgaVa1iaRUc9Lp   | 1/1/04   | 148 | 92 | 36 | -4  | 24 | 3:42 | 0  | 81 |
| Mr. Brightside - Jacques Lu Cont's Thin White Duke Mix | The Killers                               | iTunes                          | spotify:track:46gog9DTymoam1Atq4xpDI   | 1/1/07   | 134 | 74 | 56 | -7  | 39 | 8:48 | 1  | 47 |
| Mrs. de Winter bin ich                                 | Wietske van Tongeren, Susan Rigvava-Dumas | Ipod                            | spotify:track:2iK1Wm97NFurf0rfe9rsNe   | 11/17/06 | 77  | 49 | 53 | -6  | 43 | 2:30 | 83 | 12 |
| Mrs. Robinson                                          | Simon & Garfunkel                         | Samsung S7                      | spotify:track:0iOZM63len dWRTTeKh ZBSC | 4/3/68   | 92  | 46 | 61 | -14 | 81 | 4:04 | 71 | 74 |



|                                                     |                        |                               |                                                  |          |     |    |    |     |    |      |    |    |
|-----------------------------------------------------|------------------------|-------------------------------|--------------------------------------------------|----------|-----|----|----|-----|----|------|----|----|
| Naked as We Came                                    | Iron & Wine            | Deezer                        | spotify:track:<br>7be9dRbxA<br>mRogtGDJC<br>VhzE | 3/23/04  | 172 | 21 | 37 | -17 | 66 | 2:33 | 63 | 49 |
| Nandemonaiya -<br>Movie Version                     | RADWIMPS               | iphone                        | spotify:track:<br>5RuenvbahS<br>hQoSVIH4m<br>IKT | 9/29/16  | 168 | 46 | 49 | -6  | 51 | 5:42 | 24 | 35 |
| Nasty                                               | Kid Ink                | Spotify                       | spotify:track:<br>7CGI5DRfD<br>KgVpoHZv1<br>Thvj | 6/3/16   | 126 | 60 | 69 | -7  | 58 | 3:39 | 63 | 53 |
| Native Sons                                         | Snarky Puppy           | Phone /<br>Spotify<br>Premium | spotify:track:<br>6mhbgeO7a6<br>AFFlvMCUa<br>DEw | 1/1/07   | 124 | 55 | 54 | -13 | 26 | 8:54 | 7  | 26 |
| Nausicaa Suite                                      | Joe Hisaishi           | iTunes                        |                                                  |          |     |    |    |     |    |      |    |    |
| Nautical Disaster                                   | Rockabye<br>Baby!      | iPod                          | spotify:track:<br>2F8oVH3ZZ<br>AiWhZNaqX<br>iTP4 | 11/8/11  | 116 | 14 | 79 | -17 | 58 | 3:23 | 92 | 18 |
| Need The Sun To<br>Break                            | James Bay              | Spotify                       | spotify:track:<br>5qrG9Ea6he<br>n3VavTg9vQ<br>z9 | 3/23/15  | 152 | 49 | 54 | -8  | 29 | 3:45 | 10 | 57 |
| Neighbors                                           | J. Cole                | Spotify/Lap<br>top            | spotify:track:<br>0utlOiJy2we<br>V19WTkcE<br>WHy | 12/9/16  | 139 | 28 | 89 | -13 | 41 | 3:37 | 36 | 75 |
| Neon Brother                                        | Nothing But<br>Thieves | Spotify                       | spotify:track:<br>3onvqHzdPZ<br>XZrPo5GfLq<br>GE | 10/16/15 | 77  | 60 | 43 | -5  | 15 | 3:56 | 1  | 50 |
| Never Be Like You -<br>Remix Flume & Kai<br>Tribute | Farwall                | Spotify/Pho<br>ne             | spotify:track:<br>3MVfln674d<br>AGnXEGaG         | 6/20/16  | 128 | 63 | 82 | -7  | 56 | 3:18 | 20 | 12 |

|                                     |                |                                 |                                      |          |     |    |    |    |    |      |    |    |
|-------------------------------------|----------------|---------------------------------|--------------------------------------|----------|-----|----|----|----|----|------|----|----|
|                                     |                |                                 | uTK6                                 |          |     |    |    |    |    |      |    |    |
| Never Ever - Radio Edit             | All Saints     | Spotify web player - desktop PC | spotify:track:4JmS637roUkZqCjUjn030K | 3/25/16  | 134 | 47 | 73 | -6 | 33 | 3:54 | 75 | 55 |
| Never Forget You                    | MNEK           | Spotify                         | spotify:track:6v4F5IaKUITBPzt2wztoiZ | 7/22/15  | 146 | 73 | 58 | -6 | 28 | 3:33 | 0  | 55 |
| Never Hurt Again                    | Aquilo         | Spotify                         | spotify:track:1XxUhyChC3lauYQ4BINva2 | 1/27/17  | 110 | 60 | 85 | -8 | 49 | 3:00 | 5  | 56 |
| New American Times                  | James Moye     | Android/Play Music (Google)     | spotify:track:7I3Pxz8dWv7GvYNIgafIY4 | 11/26/13 | 95  | 42 | 52 | -5 | 32 | 3:26 | 85 | 2  |
| Next Girl                           | The Black Keys | ipod                            | spotify:track:2NdNUzldjso            | 5/18/10  | 86  | 70 | 52 | -6 | 24 | 3:18 | 4  | 47 |
| Next Year - Live                    | Foo Fighters   | Spotify                         | spotify:track:1TQ9HF8LMIOTAIJeX472hk | 11/7/06  | 174 | 87 | 19 | -4 | 61 | 4:35 | 0  | 41 |
| Nightfall                           | Xandria        | Spotify                         | spotify:track:2uyHShRKvdoT9yBCS5Yzrl | 5/5/14   | 172 | 88 | 40 | -6 | 17 | 3:55 | 1  | 22 |
| Nights With You - Cheat Codes Remix | MØ             | Iphone                          | spotify:track:2IE6CIzmQvcF7Mo3z4k9cr | 6/9/17   | 116 | 80 | 74 | -6 | 46 | 4:06 | 0  | 60 |
| NO EXCUSES                          | Meghan Trainor | Spotify                         | spotify:track:7fCNUWi6ufIDTQ08srXM   | 3/1/18   | 115 | 66 | 83 | -4 | 52 | 2:33 | 2  | 79 |

|                                         |                        |                  |                                      |          |     |    |    |    |    |      |    |    |
|-----------------------------------------|------------------------|------------------|--------------------------------------|----------|-----|----|----|----|----|------|----|----|
|                                         |                        |                  | Zk                                   |          |     |    |    |    |    |      |    |    |
| No Problem (feat. Lil Wayne & 2 Chainz) | Chance the Rapper      | Spotify          | spotify:track:0v9Wz8o0BT8DU38R4ddjeH | 5/27/16  | 135 | 80 | 65 | -5 | 79 | 5:05 | 16 | 78 |
| No Problem (feat. Lil Wayne & 2 Chainz) | Chance the Rapper      | Spotify          | spotify:track:0v9Wz8o0BT8DU38R4ddjeH | 5/27/16  | 135 | 80 | 65 | -5 | 79 | 5:05 | 16 | 78 |
| Not With Haste                          | Mumford & Sons         | iPhone           | spotify:track:2rC0gZUp3Flzus9OtZtnDP | 9/21/12  | 78  | 48 | 32 | -9 | 12 | 4:07 | 67 | 38 |
| Nothing's Wrong                         | HAIM                   | Deezer           | spotify:track:0rurOLe6Zi1j11fbf586vW | 7/7/17   | 144 | 73 | 55 | -5 | 62 | 3:09 | 6  | 51 |
| Now and Later                           | Sage The Gemini        | Spotify          | spotify:track:43jBqV3j3Xi1g6wO0bhIMd | 10/14/16 | 107 | 57 | 78 | -6 | 86 | 3:13 | 27 | 67 |
| Now I'm Freaking Out                    | Ween                   | iTunes           |                                      |          |     |    |    |    |    |      |    |    |
| Now Or Never                            | Stuart Valentine       | iPod Nano        | spotify:track:5GMQ7IV8XclbMgvl6O9eQv | 10/2/07  | 100 | 70 | 51 | -9 | 52 | 2:47 | 41 | 0  |
| Objection (Tango)                       | Shakira                | Sansa Clip Sport | spotify:track:36YNa8joLwu9yor2TkZblY | 11/12/01 | 179 | 86 | 60 | -5 | 71 | 3:43 | 1  | 53 |
| Of Kali Ma Calibre                      | Diablo Swing Orchestra | Computer         | spotify:track:718bClZmBl2Nul32U20mfj | 5/14/12  | 180 | 91 | 25 | -4 | 60 | 4:25 | 1  | 24 |



|                                 |                                      |                     |                                                  |          |     |    |    |     |    |      |    |    |
|---------------------------------|--------------------------------------|---------------------|--------------------------------------------------|----------|-----|----|----|-----|----|------|----|----|
| One day more                    | Les miserable<br>10th<br>Anniversary | I phone.<br>iTunes  |                                                  |          |     |    |    |     |    |      |    |    |
| One More Night                  | Maroon 5                             | iPhone<br>Music app | spotify:track:<br>6cpk00i5TxC<br>qSeqNi2HuLe     | 1/1/12   | 93  | 82 | 72 | -3  | 62 | 3:40 | 6  | 70 |
| One More Night                  | Maroon 5                             | Iphone              | spotify:track:<br>6cpk00i5TxC<br>qSeqNi2HuLe     | 1/1/12   | 93  | 82 | 72 | -3  | 62 | 3:40 | 6  | 70 |
| One Take Freestyle              | Stormzy                              | Spotify             | spotify:track:<br>4Aqk447OIS<br>HIGH7YJa<br>SF4  | 9/2/16   | 88  | 82 | 65 | -6  | 92 | 2:50 | 22 | 51 |
| One Thing Remains               | Brian Johnson                        | Spotify             | spotify:track:<br>0nQGfkhI2n<br>3KlcJomfWn<br>yx | 3/22/11  | 148 | 85 | 38 | -7  | 28 | 5:01 | 0  | 45 |
| Only my railgun                 | marasy                               | iTunes              |                                                  |          |     |    |    |     |    |      |    |    |
| Only Our Rivers Run<br>Free     | Riogh                                | iphone              |                                                  |          |     |    |    |     |    |      |    |    |
| Only The Lonely -<br>Remastered | Chris Isaak                          | iPhone /<br>music   | spotify:track:<br>1NLQRBxY<br>vRthEbj3v0c<br>XAG | 5/5/06   | 113 | 25 | 58 | -11 | 45 | 2:53 | 89 | 27 |
| Other Woman                     | Paloma Faith                         | IPhone 6 /<br>Music | spotify:track:<br>0FbuGQu6L<br>5jSxGGxHo9<br>8Zx | 11/7/14  | 131 | 78 | 73 | -4  | 89 | 3:09 | 34 | 38 |
| Overture                        | Andrew Lloyd<br>Webber               | Amazon<br>Music App | spotify:track:<br>7o3DV1szM<br>H5Fd38f1Q<br>wgPO | 12/10/04 | 121 | 43 | 18 | -12 | 28 | 2:47 | 0  | 48 |
| Paint It Black                  | The Rolling<br>Stones                | iPod                | spotify:track:<br>0wzABO1ig<br>QsSy8cQ7dl        | 4/15/66  | 159 | 80 | 48 | -9  | 57 | 3:22 | 6  | 72 |

|                                      |                                |         |                                                  |         |     |    |    |     |    |       |    |    |
|--------------------------------------|--------------------------------|---------|--------------------------------------------------|---------|-----|----|----|-----|----|-------|----|----|
|                                      |                                |         | eHK                                              |         |     |    |    |     |    |       |    |    |
| Paint You Wings                      | All Time Low                   | Spotify | spotify:track:<br>6NMzAIKmi<br>f0HbMREX<br>BuiZ4 | 9/30/13 | 160 | 98 | 42 | -4  | 57 | 3:40  | 0  | 45 |
| Painting the Clouds<br>with Sunshine | Jack Hylton &<br>His Orchestra | iTunes  | spotify:track:<br>3e5d8kQU22<br>qtHghHbr5O<br>rm | 10/1/13 | 95  | 23 | 80 | -18 | 89 | 2:59  | 98 | 17 |
| Panic Tree                           | Jimi Goodwin                   | Spotify | spotify:track:<br>5M57vu5a2B<br>9a1WoaDijjh<br>S | 3/24/14 | 124 | 70 | 59 | -6  | 79 | 2:37  | 1  | 4  |
| Paradise                             | Vaults                         | Spotify | spotify:track:<br>7haB8dccOB<br>nqkJhQHBui<br>Lo | 12/2/16 | 81  | 55 | 30 | -7  | 14 | 3:07  | 2  | 30 |
| Paradise City                        | Guns N' Roses                  | iPhone  | spotify:track:<br>3YBZIN3rek<br>qsKxbJc9FZ<br>ko | 1/1/87  | 100 | 95 | 27 | -9  | 48 | 6:46  | 2  | 77 |
| Paranda                              | Kaur-B                         | Phone   | spotify:track:<br>5QCE1mbxB<br>3ugEM7IM<br>WK9Yq | 7/10/18 | 90  | 83 | 79 | -3  | 77 | 4:07  | 38 | 39 |
| Paris                                | The<br>Chainsmokers            | Deezer  | spotify:track:<br>15vzANxN8<br>G9wWfwAJ<br>LLMCg | 1/13/17 | 100 | 64 | 65 | -7  | 25 | 3:42  | 2  | 78 |
| Paris                                | The<br>Chainsmokers            | Spotify | spotify:track:<br>15vzANxN8<br>G9wWfwAJ<br>LLMCg | 1/13/17 | 100 | 64 | 65 | -7  | 25 | 3:42  | 2  | 78 |
| Part 11                              | Philip Glass                   | Spotify | spotify:track:<br>6Xmig32xA<br>LjYPqPaDD         | 4/23/13 | 121 | 34 | 18 | -15 | 19 | 14:30 | 95 | 6  |

|                                                                  |                           |                            |                                                  |         |     |    |    |     |    |      |    |    |
|------------------------------------------------------------------|---------------------------|----------------------------|--------------------------------------------------|---------|-----|----|----|-----|----|------|----|----|
|                                                                  |                           |                            | WtLi                                             |         |     |    |    |     |    |      |    |    |
| Party Like a Russian                                             | Robbie Williams           | iPod touch                 | spotify:track:<br>5jvAliGepxz<br>KOhGp01o5I<br>T | 11/4/16 | 148 | 91 | 49 | -5  | 36 | 3:03 | 1  | 53 |
| Peace Piece                                                      | Bill Evans                | iTunes                     | spotify:track:<br>58yFroDNbz<br>HpYzvicaC0<br>de | 1/1/59  | 133 | 3  | 46 | -20 | 7  | 6:44 | 99 | 61 |
| Pelican                                                          | The Maccabees             | Apple Music on iPhone      | spotify:track:<br>0HjRzOti4w<br>vuKwIUsjZr<br>HM | 1/1/12  | 184 | 91 | 39 | -4  | 58 | 3:45 | 19 | 44 |
| Penny Lane - Stereo Mix 2017                                     | The Beatles               | Spotify                    | spotify:track:<br>57YeN4L1z<br>AYvnIIIWl3<br>hp6 | 6/1/67  | 113 | 54 | 62 | -8  | 64 | 2:59 | 4  | 65 |
| People Ain't No Good - 2011 Remastered Version                   | Nick Cave & The Bad Seeds | iPhone                     | spotify:track:<br>0c9ImAFCxa<br>rmltq6a1jCS<br>e | 1/1/97  | 120 | 11 | 43 | -17 | 23 | 5:42 | 86 | 52 |
| Personal Jesus - Single Version                                  | Depeche Mode              | Spotify                    | spotify:track:<br>4UCTgh5jvt<br>qoaMX6MA<br>hUNn | 9/28/98 | 130 | 90 | 67 | -4  | 79 | 3:45 | 9  | 67 |
| Piano Man                                                        | Billy Joel                | Spotify                    | spotify:track:<br>70C4NyhjD5<br>OZUMzvWZ<br>3njJ | 11/7/73 | 178 | 55 | 33 | -6  | 43 | 5:39 | 61 | 67 |
| Pièces de clavecin en concerts - Concert No. 3 - iii. Tambourins | Gustav Leonhardt          | Spotify                    | spotify:track:<br>6ql69cgeGj8<br>KXxGWiz9b<br>Ig | 6/12/12 | 130 | 46 | 50 | -12 | 88 | 2:54 | 54 | 0  |
| Pitch Black                                                      | Vicetone                  | Mobile phone / Google play | spotify:track:<br>1tTNmSHxN<br>X1ZrM44apI        | 1/22/16 | 128 | 87 | 62 | -7  | 38 | 2:55 | 1  | 44 |

|                                             |                       |                                                  |                                       |          |     |    |    |     |    |      |    |    |
|---------------------------------------------|-----------------------|--------------------------------------------------|---------------------------------------|----------|-----|----|----|-----|----|------|----|----|
|                                             |                       | music                                            | g53                                   |          |     |    |    |     |    |      |    |    |
| Play That Funky Music                       | Wild Cherry           | Spotify                                          | spotify:track:5uuJruktM9fMdn9Va0DUMI  | 1/1/76   | 109 | 67 | 81 | -12 | 93 | 5:00 | 4  | 67 |
| PLAYING WITH FIRE                           | BLACKPINK             | Spotify                                          | spotify:track:7e7VjLxO5xJINHvnRytrqi  | 11/1/16  | 97  | 76 | 71 | -5  | 67 | 3:17 | 4  | 75 |
| Pocket Calculator - 2009 Remastered Version | Kraftwerk             | iTunes                                           | spotify:track:4xalgzSKd6ihtVGd8dWs69  | 1/1/81   | 136 | 46 | 86 | -13 | 96 | 4:57 | 63 | 42 |
| Poison                                      | Alice Cooper          | MP3                                              | spotify:track:5XcZRGjv3zMhTqCyESjQrF  | 7/25/89  | 119 | 91 | 28 | -6  | 26 | 4:30 | 3  | 68 |
| Polar Bear                                  | King Charles          | Phone (Vodafone Smart Ultra 6) on play music app | spotify:track:6LrYjqcs6TaEzoRUKnfULu  | 1/1/12   | 170 | 76 | 51 | -7  | 54 | 4:32 | 8  | 17 |
| Porcelina of the Vast Oceans                | The Smashing Pumpkins | Apple music                                      | spotify:track:2I0r4awu38uuWfpEuH35mH  | 12/12/95 | 111 | 44 | 31 | -11 | 5  | 9:22 | 0  | 45 |
| Prelude                                     | I Am Abomination      | Itunes                                           | spotify:track:1NvcDo7Am6GXbLO9sUloOee | 1/1/09   | 160 | 91 | 34 | -6  | 46 | 0:48 | 16 | 9  |
| Princess of China                           | Coldplay              | iPhone                                           | spotify:track:4HXOBjwv2RnLpGG4xWOO6N  | 10/24/11 | 85  | 69 | 43 | -6  | 23 | 3:59 | 0  | 68 |

|                                                                              |                      |                        |                                       |          |     |    |    |     |    |      |    |    |
|------------------------------------------------------------------------------|----------------------|------------------------|---------------------------------------|----------|-----|----|----|-----|----|------|----|----|
| Promenade                                                                    | Keston Cobblers Club | Iphone                 | spotify:track:5TekJZoBG4rRY19LtIW52u  | 8/27/12  | 125 | 27 | 68 | -12 | 29 | 1:21 | 99 | 10 |
| Promise                                                                      | Ben Howard           | Spotify                | spotify:track:4qyfir5Yr7nf005g6cyFMT  | 1/1/11   | 157 | 19 | 37 | -16 | 18 | 6:24 | 89 | 63 |
| Psycho                                                                       | Muse                 | iPhone 7 / Apple Music | spotify:track:383QXk8nb2YrARMUwDdjQS  | 6/4/15   | 125 | 88 | 56 | -3  | 51 | 5:17 | 0  | 70 |
| Psychotic Reaction                                                           | Count Five           | Spotify                | spotify:track:5JeaA4A9ZoXthwEnxOxWvP  | 1/1/66   | 165 | 75 | 35 | -7  | 67 | 3:06 | 0  | 53 |
| Pulcinella Suite: VII. Vivo                                                  | Igor Stravinsky      | Spotify                | spotify:track:3B0uJXOUzCVrSQmAJmxPA1  | 6/3/16   | 127 | 18 | 66 | -18 | 76 | 1:31 | 98 | 13 |
| Pumped Up Kicks                                                              | Foster The People    | Spotify                | spotify:track:7w87IxuO7BDcJ3YUqCyMTT  | 5/23/11  | 128 | 71 | 73 | -6  | 97 | 4:00 | 14 | 83 |
| Purcell / Arr Pluhar: Oedipus, King of Thebes, Z. 583/2: "Music for a while" | Henry Purcell        | Spotify                | spotify:track:2UK3kMSQc8fMTCjEy kifQ7 | 2/26/14  | 137 | 5  | 36 | -23 | 12 | 5:54 | 96 | 36 |
| Pure Morning                                                                 | Placebo              | iPhone 6s              | spotify:track:1TqmZVIyeD4aN4Wa0wbnfy  | 10/12/98 | 81  | 90 | 39 | -7  | 20 | 4:15 | 4  | 60 |
| Purple Rain                                                                  | Prince               | iTunes                 | spotify:track:54X78diSLoUDI3joC2bjMz  | 6/25/84  | 113 | 45 | 37 | -10 | 19 | 8:41 | 4  | 75 |
| Put the Blame On Mame - Theme from                                           | Rita Hayworth        | Apple Music /          | spotify:track:1G6kNAm                 | 2/14/14  | 111 | 26 | 53 | -16 | 79 | 2:18 | 99 | 28 |

|                                       |                        |                                 |                                                  |         |     |    |    |     |    |      |    |    |
|---------------------------------------|------------------------|---------------------------------|--------------------------------------------------|---------|-----|----|----|-----|----|------|----|----|
| "Gilda" Original Soundtrack           |                        | Iphone                          | AE4c750iN<br>UXVqT                               |         |     |    |    |     |    |      |    |    |
| Questing, Not Coasting                | Maximo Park            | Ipod classic                    | spotify:track:<br>5XDkyRWa<br>GN3mrpw11<br>lfVGa | 10/5/09 | 150 | 83 | 43 | -6  | 49 | 3:42 | 9  | 29 |
| Question Is                           | Tory Lanez             | Apple Music                     | spotify:track:<br>5bhAv8JVL<br>W77s3VjxGt<br>4Q6 | 8/19/16 | 80  | 58 | 64 | -8  | 46 | 5:05 | 64 | 44 |
| Quit Playing Games (With My Heart)    | Backstreet Boys        | Spotify web player - desktop PC | spotify:track:<br>0Uqs7ilt5kG<br>X9NzFDWT<br>BrP | 1/1/96  | 100 | 83 | 80 | -7  | 90 | 3:53 | 6  | 65 |
| Radio Silence                         | James Blake            | Iphone                          | spotify:track:<br>0ZPPbwJD2<br>WVU8HdMs<br>VtChk | 5/5/16  | 120 | 41 | 53 | -10 | 42 | 4:01 | 77 | 50 |
| Radioactive                           | Imagine Dragons        | Spotify                         | spotify:track:<br>62yJjFtgkhU<br>rXktloSjgP2     | 1/1/12  | 136 | 79 | 46 | -4  | 20 | 3:07 | 11 | 78 |
| Rainingmen                            | Sister sledge          | iPhone                          |                                                  |         |     |    |    |     |    |      |    |    |
| Rather Be (feat. Jess Glynne)         | Clean Bandit           | iTunes                          | spotify:track:<br>0TVV2gFRO<br>JaB3kIZyCU<br>vIY | 5/27/14 | 121 | 59 | 80 | -7  | 55 | 3:48 | 16 | 61 |
| Read all about it                     | Emeli Sande and Eminem | Apple music                     |                                                  |         |     |    |    |     |    |      |    |    |
| Reasons Not to Be an Idiot            | Frank Turner           | Ipod                            | spotify:track:<br>20InRAJs767<br>clBIHmhp<br>Wz  | 3/30/08 | 145 | 63 | 55 | -11 | 79 | 3:49 | 0  | 32 |
| Red Light Indicates Doors Are Secured | Arctic Monkeys         | iTunes                          | spotify:track:<br>56GF1p1dk7<br>dw56pQdT         | 1/29/06 | 111 | 85 | 62 | -5  | 91 | 2:24 | 0  | 58 |

|                                            |                                               |          |                                       |          |     |    |    |     |    |      |    |    |
|--------------------------------------------|-----------------------------------------------|----------|---------------------------------------|----------|-----|----|----|-----|----|------|----|----|
|                                            |                                               |          | qW                                    |          |     |    |    |     |    |      |    |    |
| Rehab - Live On Jools Holland              | Amy Winehouse                                 | Spotify  | spotify:track:7E4dtl5gWR0iMKibvedh0i  | 10/30/15 | 144 | 78 | 43 | -5  | 43 | 3:41 | 4  | 49 |
| Rejoice (Live)                             | Sonnie Badu                                   | Spotify  | spotify:track:3Ym7gwmNWzHdJBs9hNMEtJ  | 9/21/16  | 89  | 86 | 57 | -4  | 63 | 5:05 | 47 | 21 |
| Remember The Name (feat. Styles Of Beyond) | Fort Minor                                    | Spotify. | spotify:track:6ndmKwWqMozN2tcZqzCX4K  | 1/1/05   | 85  | 84 | 69 | -4  | 88 | 3:50 | 6  | 78 |
| Reminder                                   | The Weeknd                                    | iPhone   | spotify:track:37F0uwRSrdzkBiuJ0D5UHI  | 11/25/16 | 160 | 51 | 71 | -7  | 39 | 3:39 | 14 | 74 |
| Revelation Song - Live                     | Passion                                       | Spotify  | spotify:track:35msHwn81uKQS5Jn783oSU  | 1/1/13   | 127 | 56 | 21 | -6  | 9  | 8:29 | 4  | 52 |
| Revoltng Children                          | Matilda the Musical Original Cast             | Ipod     | spotify:track:5jb55O3h5dfOK4YMUbtb1Y  | 10/13/11 | 116 | 70 | 72 | -6  | 59 | 2:33 | 47 | 56 |
| Revoltng Children                          | Original Broadway Cast Of Matilda The Musical | Ipad     | spotify:track:4xwyLdkNblvpSqGRej9at0  | 9/26/13  | 116 | 70 | 68 | -8  | 57 | 2:33 | 47 | 29 |
| Riptide                                    | Vance Joy                                     | Ipod     | spotify:track:7yq4Qj7cqayVTp3FF9CWbwm | 9/8/14   | 102 | 73 | 48 | -7  | 51 | 3:24 | 43 | 77 |
| River                                      | Joni Mitchell                                 | iTunes   | spotify:track:0DAmSYQW9kq9gQN         | 6/22/71  | 61  | 15 | 41 | -14 | 38 | 4:05 | 98 | 54 |





|                      |                        |                   |                                                  |          |     |    |    |     |    |          |    |    |
|----------------------|------------------------|-------------------|--------------------------------------------------|----------|-----|----|----|-----|----|----------|----|----|
| Royals               | Lorde                  | Mac               | spotify:track:<br>2dLLR6qlu5<br>UJ5gk0dKz0<br>h3 | 1/1/13   | 85  | 43 | 62 | -10 | 30 | 3:10     | 11 | 81 |
| Royksopp's Night Out | Røyksopp               | Spotify           | spotify:track:<br>2cxyrWGI8Y<br>y5JowrTvFw<br>TR | 1/1/01   | 101 | 88 | 67 | -8  | 76 | 7:30     | 1  | 23 |
| Ruidos               | Cuarteto<br>Cedron     | iPhone/Mus<br>ic  | spotify:track:<br>6njiQX9G49<br>PrWWTfqt<br>W6J  | 10/23/12 | 82  | 35 | 29 | -6  | 33 | 3:32     | 61 | 1  |
| Rumor Has It         | Judson<br>Mancebo      | Phone             | spotify:track:<br>0tX9fzRmoO<br>iTo1orsStTsp     | 6/27/18  | 96  | 18 | 64 | -17 | 33 | 3:51     | 99 | 10 |
| Running On Faith     | Eric Clapton           | Spotify<br>Laptop | spotify:track:<br>64fZ1gcN7rE<br>zbdibOP1inl     | 8/25/92  | 131 | 56 | 54 | -9  | 52 | 6:31     | 22 | 50 |
| Ryo                  | Kawabata<br>Makoto     | iPod<br>Classic   | spotify:track:<br>142pBoyrBv<br>JkaSvrFyI4R<br>M | 9/18/07  | 134 | 66 | 15 | -10 | 3  | 67:51:00 | 4  | 0  |
| Sally free and easy  | Show of Hands          | ipod              |                                                  |          |     |    |    |     |    |          |    |    |
| Santa Monica Dream   | Angus & Julia<br>Stone | Spotify           | spotify:track:<br>47YITQYhJ<br>Xw79nCor48<br>tnq | 3/15/10  | 120 | 26 | 47 | -14 | 7  | 5:30     | 91 | 53 |
| Save Me              | BTS                    | Spotify           | spotify:track:<br>54s6sdPuMj<br>VtdB5d5KFz<br>TC | 5/2/16   | 140 | 82 | 61 | -3  | 54 | 3:17     | 3  | 75 |
| Savior               | Rise Against           | Spotify           | spotify:track:<br>1vexF91pWs<br>9uNwDROui<br>CPB | 1/1/08   | 112 | 93 | 55 | -3  | 48 | 4:02     | 0  | 73 |

|                                                      |                         |                      |                                                  |         |     |    |    |     |    |      |    |    |
|------------------------------------------------------|-------------------------|----------------------|--------------------------------------------------|---------|-----|----|----|-----|----|------|----|----|
| Say You Won't Let Go                                 | James Arthur            | Spotify              | spotify:track:<br>1Pw5C4N6F<br>n5E4mGCx<br>mbbVa | 9/9/16  | 99  | 56 | 40 | -7  | 48 | 3:31 | 69 | 80 |
| Sea of Love                                          | Cat Power               | Spotify              | spotify:track:<br>1J3w85cS3F<br>EmoSKRu2d<br>QJ8 | 3/21/00 | 78  | 9  | 56 | -11 | 12 | 2:19 | 94 | 62 |
| Seasons Of Love -<br>From The Motion<br>Picture RENT | Cast Of Rent            | I phone / I<br>tunes | spotify:track:<br>3SnXIPWci<br>HwAS04oKd<br>PC0l | 8/2/05  | 178 | 57 | 44 | -5  | 44 | 3:04 | 58 | 53 |
| Seasons Of Love -<br>From The Motion<br>Picture RENT | Cast Of Rent            | Samsung<br>S6        | spotify:track:<br>3SnXIPWci<br>HwAS04oKd<br>PC0l | 8/2/05  | 178 | 57 | 44 | -5  | 44 | 3:04 | 58 | 53 |
| Seb-1.02                                             | Squarepusher            | Spotify              | spotify:track:<br>5r58grBRpM<br>oQEb0bieoX<br>LG | 1/1/09  | 103 | 6  | 45 | -21 | 20 | 1:58 | 96 | 9  |
| Second Hand News -<br>Remastered                     | Fleetwood Mac           | iPod                 | spotify:track:<br>0hlniElQOr5t<br>vSKBaSpAQ<br>i | 2/4/77  | 118 | 94 | 70 | -5  | 50 | 2:56 | 24 | 58 |
| Secret Heart                                         | Feist                   | iPod                 | spotify:track:<br>7JVd7kn6A6<br>2mGzlr03iN<br>TE | 1/1/04  | 101 | 43 | 78 | -15 | 36 | 3:49 | 85 | 31 |
| Secret Someones                                      | Laura Veirs             | Spotify              | spotify:track:<br>1poF1ikXHB<br>FF2bGkvmY<br>rmI | 8/23/05 | 143 | 71 | 49 | -9  | 46 | 5:15 | 9  | 19 |
| Seein' Stars                                         | Speaker Of The<br>House | Spotify              | spotify:track:<br>1IoiRzGCfR<br>Gc8fAPgqn7<br>z0 | 2/19/15 | 124 | 72 | 69 | -5  | 32 | 4:47 | 17 | 27 |

|                                                             |                            |                                 |                                                  |         |     |    |    |     |    |      |    |    |
|-------------------------------------------------------------|----------------------------|---------------------------------|--------------------------------------------------|---------|-----|----|----|-----|----|------|----|----|
| Segull                                                      | Hugar                      | Spotify                         | spotify:track:<br>5jb0HjJA7R<br>vwrU5sFq0F<br>M1 | 7/28/14 | 70  | 1  | 7  | -30 | 4  | 3:29 | 98 | 11 |
| September Song                                              | JP Cooper                  | Spotify                         | spotify:track:<br>0zbzrhfVS9S<br>2TszW3wLQ<br>Z7 | 10/6/17 | 96  | 62 | 61 | -7  | 37 | 3:40 | 5  | 74 |
| Seventeen Landscapes                                        | Heron Oblivion             | Spotify                         | spotify:track:<br>5c6n2GFHft<br>nwkFhAEQR<br>08K | 3/4/16  | 80  | 30 | 37 | -11 | 19 | 7:14 | 58 | 2  |
| Sex With The Ex                                             | Reverend And<br>The Makers | Spotify                         | spotify:track:<br>32l6wURmc<br>AQEXhIFM<br>NFHLA | 9/16/07 | 117 | 46 | 42 | -6  | 7  | 4:07 | 1  | 29 |
| Sexy Den A Mutha                                            | Cheryl                     | Apple<br>music                  | spotify:track:<br>4erAL4EBo<br>D3Yx6Dwx8<br>3oAB | 1/1/12  | 129 | 86 | 74 | -4  | 65 | 3:40 | 9  | 33 |
| Shadows In The<br>Moonlight                                 | Anne Murray                | iPad                            | spotify:track:<br>5qujByYxjT<br>21vCeRlaOo<br>qI | 1/1/94  | 105 | 56 | 66 | -9  | 40 | 3:30 | 2  | 33 |
| Shake Your Body<br>(Down to the Ground)<br>- Single Version | The Jacksons               | Phone<br>(Samsung<br>Galaxy S6) | spotify:track:<br>0bSTBRdN4i<br>BepZ8bUcV<br>q0S | 6/28/04 | 117 | 73 | 80 | -7  | 84 | 3:45 | 5  | 49 |
| Shape of You                                                | Ed Sheeran                 | Spotify                         | spotify:track:<br>7qiZfU4dY11<br>WllzX7mPBI<br>3 | 3/3/17  | 96  | 65 | 83 | -3  | 93 | 3:54 | 58 | 90 |
| Shape of You                                                | Ed Sheeran                 | Spotify                         | spotify:track:<br>7qiZfU4dY11<br>WllzX7mPBI<br>3 | 3/3/17  | 96  | 65 | 83 | -3  | 93 | 3:54 | 58 | 90 |

|                                                                                   |                       |                          |                                      |         |     |    |    |     |    |      |    |    |
|-----------------------------------------------------------------------------------|-----------------------|--------------------------|--------------------------------------|---------|-----|----|----|-----|----|------|----|----|
| Shoes and Ships                                                                   | Fuchsia               | Itunes                   |                                      |         |     |    |    |     |    |      |    |    |
| Shostakovich : String Quartet No.8 in C minor Op.110 : III Allegretto             | Dmitri Shostakovich   | Desktop computer/Spotify | spotify:track:0ESJA9rZJGzdkRuGBrsv   | 1/1/90  | 124 | 5  | 47 | -25 | 49 | 4:05 | 96 | 8  |
| Should I Stay or Should I Go - Remastered                                         | The Clash             | Spotify                  | spotify:track:39shmbIHICJ2Wxnk1fPSdz | 1/1/82  | 113 | 83 | 74 | -6  | 82 | 3:09 | 8  | 78 |
| Shuffle                                                                           | Bombay Bicycle Club   | Laptop - Spotify         | spotify:track:4yYvWFUWMaKMXtoJKJnmZk | 1/1/11  | 110 | 96 | 63 | -5  | 40 | 3:55 | 32 | 58 |
| Shut Up and Dance                                                                 | WALK THE MOON         | iPad                     | spotify:track:0kzw2tRyuL9rzipi5ntIly | 6/15/15 | 128 | 87 | 58 | -4  | 62 | 3:19 | 1  | 68 |
| Sibelius Violin Concerto                                                          | Victoria Mullova      | iphone                   |                                      |         |     |    |    |     |    |      |    |    |
| Side to Side (Originally by Ariana Grande and Nicki Minaj) - Karaoke Instrumental | Karaoke Freaks        | Spotify                  | spotify:track:6A9IUa9ugPmAOap2sDQ89d | 9/1/16  | 161 | 28 | 81 | -14 | 32 | 3:37 | 4  | 4  |
| Simple Song                                                                       | Passenger             | I pad                    | spotify:track:70HWRkitkAKfos500LBk0T | 7/28/17 | 78  | 40 | 63 | -11 | 60 | 3:48 | 62 | 65 |
| Singet dem Herrn ein neues Lied, BWV 225: Lobet den Herrn in seinen Taten         | Johann Sebastian Bach | iTunes                   | spotify:track:26HsPAGeQN6KLnXQhmezum | 6/5/12  | 102 | 33 | 45 | -22 | 72 | 3:09 | 99 | 16 |
| Sink To The Bottom                                                                | Fountains Of Wayne    | Samsung S6 Music         | spotify:track:32uXfxJERzv4RK1gMLXbOA | 1/1/96  | 97  | 71 | 47 | -6  | 81 | 3:12 | 1  | 43 |

|                                       |                     |                     |                                      |          |     |    |    |    |    |      |    |    |
|---------------------------------------|---------------------|---------------------|--------------------------------------|----------|-----|----|----|----|----|------|----|----|
| Sitting on the Dock of the Bay - Live | Percy Sledge        | ipod                | spotify:track:46rT4C0rDU2blIj6aNksql | 3/10/17  | 174 | 57 | 37 | -8 | 22 | 3:25 | 43 | 14 |
| Six Billion                           | Nothing But Thieves | Spotify             | spotify:track:44yES5bd4ezm4W6workRfh | 10/16/15 | 144 | 45 | 30 | -6 | 21 | 3:47 | 15 | 51 |
| Six Feet Under                        | The Weeknd          | Apple Music         | spotify:track:4mU5iXHeLgbR94siF7p1sY | 11/25/16 | 140 | 50 | 77 | -8 | 24 | 3:58 | 13 | 70 |
| Six Weeks                             | Of Monsters and Men | Phone, Amazon Music | spotify:track:29uPSxuWuR6Hr1SUu2Cw6z | 1/1/12   | 124 | 88 | 38 | -6 | 42 | 5:34 | 0  | 51 |
| Sleepless Nights - GANZ Remix         | Hamertje Tik        | Spotify             | spotify:track:62V56f4QO63mMuhGKv0fRO | 5/26/14  | 137 | 70 | 64 | -9 | 63 | 4:19 | 0  | 23 |
| Slip Away                             | Mad Season          | Apple music         | spotify:track:34jo30IPEqp6QvJe04NAFu | 1/1/95   | 116 | 57 | 31 | -6 | 13 | 5:38 | 0  | 42 |
| Slunecko                              | Cechomor            | Spotify             | spotify:track:2s2YWEQPbJAwOhZs57NnuW | 1/1/00   | 160 | 75 | 52 | -7 | 39 | 3:54 | 20 | 10 |
| Smile                                 | Otxhello            | Soundcloud          |                                      |          |     |    |    |    |    |      |    |    |
| Smooth                                | Santana             | Music (Iphone)      | spotify:track:0n2SEXB2qoRQg171q7XqeW | 1/1/99   | 116 | 92 | 61 | -4 | 96 | 4:55 | 16 | 71 |
| Smooth                                | Santana             | Apple iphone        | spotify:track:0n2SEXB2qoRQg171q7XqeW | 1/1/99   | 116 | 92 | 61 | -4 | 96 | 4:55 | 16 | 71 |

|                                                           |              |                    |                                                  |         |     |    |    |     |    |      |    |    |
|-----------------------------------------------------------|--------------|--------------------|--------------------------------------------------|---------|-----|----|----|-----|----|------|----|----|
| Smooth                                                    | Santana      | Ipod classic       | spotify:track:<br>0n2SEXB2q<br>oRQg171q7<br>XqeW | 1/1/99  | 116 | 92 | 61 | -4  | 96 | 4:55 | 16 | 71 |
| So What                                                   | P!nk         | Samsung<br>tablet  | spotify:track:<br>19qn6oU2t0<br>E72ENA0a<br>WNsX | 1/1/08  | 126 | 89 | 54 | -3  | 45 | 3:35 | 0  | 70 |
| So You Want To Be A<br>Rock 'N' Roll Star                 | Patti Smith  | iTunes             | spotify:track:<br>5KGJghq19E<br>mdyeLbtcey<br>Rm | 1/1/01  | 149 | 80 | 25 | -6  | 64 | 6:03 | 51 | 30 |
| Social Disease -<br>Remastered 2014                       | Elton John   | iPod               | spotify:track:<br>0Gvc5li3duA<br>ifGy2QaFDV<br>t | 10/5/73 | 190 | 79 | 35 | -7  | 82 | 3:43 | 22 | 34 |
| Sofia                                                     | Alvaro Soler | Spotify            | spotify:track:<br>0W2pKKNH<br>nfZZgcAxDP<br>W0hy | 7/15/16 | 128 | 73 | 70 | -6  | 89 | 3:30 | 12 | 60 |
| Someone In The<br>Crowd - From "La La<br>Land" Soundtrack | Emma Stone   | Spotify            | spotify:track:<br>39ncDMVid<br>HOeQgeC5a<br>nYZM | 12/9/16 | 128 | 54 | 62 | -9  | 28 | 4:20 | 9  | 65 |
| Something Good                                            | alt-J        | Spotify            | spotify:track:<br>4JVSkSJAK<br>bSlwkSepkX<br>cK6 | 5/28/12 | 109 | 59 | 68 | -10 | 52 | 3:38 | 73 | 57 |
| Something That We're<br>Not                               | Demi Lovato  | Itunes             | spotify:track:<br>527vaaTSgrF<br>Z23x8CGA4<br>8f | 1/1/13  | 129 | 94 | 74 | -3  | 88 | 3:17 | 3  | 33 |
| Sommarfågel                                               | Wintergatan  | Iphone/Spot<br>ify | spotify:track:<br>3fny5rAub4a<br>4UAOiEo3T<br>ny | 4/24/13 | 180 | 87 | 36 | -7  | 35 | 3:53 | 10 | 42 |

|                                                                                                       |                                     |                                                      |                                                  |          |     |    |    |     |    |      |    |    |
|-------------------------------------------------------------------------------------------------------|-------------------------------------|------------------------------------------------------|--------------------------------------------------|----------|-----|----|----|-----|----|------|----|----|
| Song 2 - 2012<br>Remastered Version                                                                   | Blur                                | Spotify                                              | spotify:track:<br>1FTSo4v6B<br>OZH9QxKc3<br>MbVM | 2/10/97  | 130 | 79 | 67 | -7  | 92 | 2:01 | 0  | 77 |
| Song With a Mission                                                                                   | The Sounds                          | Iphone                                               | spotify:track:<br>5WC7VHPij<br>gtfOIQrvmta<br>Zr | 3/15/06  | 150 | 75 | 54 | -3  | 80 | 2:58 | 2  | 37 |
| Soon After This                                                                                       | Broken Twin                         | Iphone                                               | spotify:track:<br>1peNmmft2q<br>Hn3KFgDQ<br>ZatJ | 4/29/14  | 84  | 8  | 37 | -16 | 8  | 4:30 | 90 | 12 |
| Soon and Very Soon                                                                                    | Selah<br>(American<br>Gospel Group) | Ipod Nano                                            |                                                  |          |     |    |    |     |    |      |    |    |
| Sound & Color                                                                                         | Alabama<br>Shakes                   | Mac                                                  | spotify:track:<br>4jVQBszyxs<br>a0GeRSe5To<br>VC | 4/17/15  | 115 | 43 | 55 | -7  | 18 | 3:02 | 85 | 57 |
| South Wales and West<br>: Television March<br>(Original title Seven<br>Seas March)<br>(Recorded 1937) | Eric Coates                         | default<br>music<br>player on<br>LG Android<br>phone | spotify:track:<br>0mkw1t4tP3<br>pY7sJwGSA<br>wdK | 7/1/13   | 134 | 46 | 49 | -16 | 67 | 2:48 | 55 | 0  |
| Southern Cross                                                                                        | The Ozark<br>Mountain<br>Daredevils | iPad                                                 | spotify:track:<br>69hbKkOa45<br>vh2oWOwD<br>eBFG | 1/1/75   | 140 | 78 | 53 | -11 | 78 | 3:30 | 2  | 11 |
| Spread Your Wings -<br>Remastered 2011                                                                | Queen                               | Zune                                                 | spotify:track:<br>0nUCaKwNq<br>O5whVAhE<br>X1A1R | 10/28/77 | 175 | 66 | 40 | -6  | 49 | 4:34 | 29 | 54 |
| St. Paul's                                                                                            | Deaf Havana                         | Spotify                                              | spotify:track:<br>0dMOQ7nZ<br>Ax7JV7M6n<br>FhRzM | 1/27/17  | 108 | 52 | 38 | -7  | 15 | 3:58 | 24 | 38 |

|                                                                                   |                      |                |                                      |          |     |    |    |     |    |       |    |    |
|-----------------------------------------------------------------------------------|----------------------|----------------|--------------------------------------|----------|-----|----|----|-----|----|-------|----|----|
| Stand Up                                                                          | Dakoda Motor Co.     | iPhone/Spotify | spotify:track:2bgy5rVeT3VrVCrtQg16z0 | 1/1/94   | 132 | 94 | 59 | -5  | 73 | 4:21  | 2  | 6  |
| Starboy                                                                           | The Weeknd           | Spotify        | spotify:track:7MXVkk9YMctZqd1Srtv4MB | 11/25/16 | 186 | 59 | 68 | -7  | 49 | 3:50  | 14 | 84 |
| Starry Eyed                                                                       | Ellie Goulding       | Spotify        | spotify:track:14OF4JQOIm4hb0GfG5nfyF | 1/1/10   | 150 | 81 | 50 | -5  | 60 | 2:57  | 14 | 57 |
| Stepson Of The Clapper                                                            | J Dilla              | Ipod classic   | spotify:track:4fy2Asi2h2BrzpzpU8zWl  | 2/7/06   | 99  | 68 | 62 | -8  | 19 | 1:01  | 5  | 37 |
| Stille Nacht, heilige Nacht                                                       | Franz Xaver Gruber   | iPod           | spotify:track:0dGoDyJ0PFAR4hPXc4niKK | 1/1/16   | 77  | 16 | 17 | -18 | 4  | 3:24  | 99 | 0  |
| Storm                                                                             | Ruelle               | iPhone, music  |                                      |          |     |    |    |     |    |       |    |    |
| Streets of London                                                                 | Ralph McTell         | Iphone/Spotify | spotify:track:0P49pJa288tm8gKbFcofn9 | 1/1/69   | 156 | 30 | 40 | -15 | 19 | 4:09  | 63 | 53 |
| Stressed Out                                                                      | Twenty One Pilots    | Samsung Music  | spotify:track:3CRDbSIZ4r5MsZ0YwxuEkn | 5/15/15  | 170 | 64 | 73 | -6  | 65 | 3:22  | 5  | 84 |
| String Quartet No. 10, "Hosttidlos" (Harvest Timeless): Allegro fluente           | Per Nørgård          | Spotify        | spotify:track:4Wr28Ded0IqqIHkltqRMrI | 5/1/08   | 78  | 7  | 22 | -24 | 4  | 13:40 | 96 | 18 |
| String Quartet No. 7 in F Major, Op. 59/1, "Razumovsky Quartet No. 1": I. Allegro | Ludwig van Beethoven | Spotify        | spotify:track:6Fs4kRAu4c39smFU43jvIc | 4/29/14  | 149 | 12 | 32 | -18 | 17 | 11:40 | 96 | 0  |



|                                                        |                                                    |                           |                                      |          |     |    |    |     |    |      |    |    |
|--------------------------------------------------------|----------------------------------------------------|---------------------------|--------------------------------------|----------|-----|----|----|-----|----|------|----|----|
| Subterranean                                           | Foo Fighters                                       | Ipod touch 6th generation | spotify:track:3O2de2JdIqnVVb5SBpg6wm | 11/10/14 | 113 | 66 | 39 | -7  | 6  | 6:08 | 0  | 48 |
| Summer                                                 | Calvin Harris                                      | iTunes                    | spotify:track:6YUTL4dYpB9xZO5qExPf05 | 10/31/14 | 128 | 86 | 60 | -4  | 74 | 3:43 | 2  | 81 |
| Summer Love                                            | One Direction                                      | Sony                      | spotify:track:2LjmbI7LJt0RDg612cBi7U | 11/9/12  | 122 | 59 | 50 | -5  | 29 | 3:28 | 36 | 60 |
| Summer Music, Op. 31, First Movement, by Samuel Barber | St. Louis Symphony Orchestra                       | Zune                      |                                      |          |     |    |    |     |    |      |    |    |
| Summer Nights                                          | Florrie                                            | iPhone 6 / music          | spotify:track:01tEYiHPfq2A9pPm4z9IDZ | 11/15/10 | 115 | 90 | 76 | -4  | 88 | 3:55 | 1  | 23 |
| Summer of 69                                           | Danny Brian                                        | Ipod                      | spotify:track:3hPpdYz6TPu4j9iVm9vrlr | 1/20/15  | 139 | 59 | 52 | -7  | 59 | 3:29 | 32 | 24 |
| Summertime                                             | Billie Holliday with Bob Haggart and His Orchestra | iPod / iTunes             | spotify:track:4A8kiMOvOl8k4toAYzT4BO | 3/20/17  | 99  | 20 | 62 | -13 | 61 | 2:55 | 89 | 11 |
| Summertime                                             | Willie Nelson                                      | IPhone                    | spotify:track:0zMw7VSIkgTxiP8dQSOHHi | 2/26/16  | 100 | 27 | 55 | -13 | 30 | 3:54 | 83 | 38 |
| Sun Hits The Sky                                       | Supergrass                                         | Spotify                   | spotify:track:0mIzErjrNQzOTDtn4UYflo | 4/21/97  | 151 | 93 | 37 | -7  | 37 | 4:56 | 0  | 47 |
| Sunshine Of Your Love - Live                           | Eric Clapton                                       | IPhone                    | spotify:track:5JxU4Ke4oAQ4cyP4myFe   | 11/5/02  | 113 | 93 | 54 | -4  | 48 | 7:11 | 7  | 33 |

|                                   |                             |                                     |                                      |          |     |    |    |     |    |      |    |    |
|-----------------------------------|-----------------------------|-------------------------------------|--------------------------------------|----------|-----|----|----|-----|----|------|----|----|
|                                   |                             |                                     | D3                                   |          |     |    |    |     |    |      |    |    |
| Sunshine On My Shoulder           | Orquesta Música Maravillosa | Ipad                                | spotify:track:0denJ7qYMpU2zBPeOSOoJW | 5/11/15  | 148 | 34 | 60 | -20 | 41 | 5:44 | 93 | 0  |
| Super Rich Kids                   | Frank Ocean                 | Spotify                             | spotify:track:0K9oqDmJBgSFjXU1bUY9Fk | 1/1/12   | 60  | 42 | 74 | -8  | 62 | 5:05 | 24 | 63 |
| Superstitious                     | Stevie Wonder               | I pod shuffle                       |                                      |          |     |    |    |     |    |      |    |    |
| Surfin'                           | Kid Cudi                    | Spotify                             | spotify:track:3f2k8op0nWDoZM4pXim6wG | 9/30/16  | 130 | 69 | 81 | -8  | 84 | 3:58 | 11 | 60 |
| Suspended Animation               | KMD                         | iPod Classic                        | spotify:track:7reWvKIoJKYILEJVE64eqI | 12/18/15 | 90  | 67 | 69 | -9  | 50 | 2:24 | 8  | 22 |
| Sweet Mood                        | Dennis Wilson               | iTunes                              |                                      |          |     |    |    |     |    |      |    |    |
| Sweet Talk                        | Dear and the Headlights     | Spotify                             | spotify:track:757fXABDTbalNzihYS3mUc | 1/1/07   | 161 | 91 | 43 | -6  | 74 | 2:57 | 0  | 48 |
| Sweet Talk                        | The Killers                 | Samsung phone/Google play music app | spotify:track:4IBTEftHDFMV8femNMlfMP | 1/1/07   | 180 | 92 | 37 | -4  | 39 | 4:19 | 1  | 51 |
| Swings And Waterslides            | Viola Beach                 | Spotify                             | spotify:track:0RPIftkdYfx8YUJ0F67liM | 7/29/16  | 120 | 79 | 64 | -5  | 26 | 3:39 | 1  | 51 |
| Symphony No. 3: II. Allegro molto | Aaron Copland               | Spotify                             | spotify:track:4HK6fU55Q              | 6/9/17   | 76  | 12 | 37 | -17 | 20 | 8:36 | 96 | 23 |

|                                                           |                         |                                  |                                      |          |     |    |    |     |    |      |    |    |
|-----------------------------------------------------------|-------------------------|----------------------------------|--------------------------------------|----------|-----|----|----|-----|----|------|----|----|
|                                                           |                         |                                  | 3kTyr4tyAM58x                        |          |     |    |    |     |    |      |    |    |
| Symphony No.39 In E Flat, K.543: 3. Menuetto (Allegretto) | Wolfgang Amadeus Mozart | Spotify                          | spotify:track:5MvRYMK5gWk65ppvZwFgJ3 | 1/1/02   | 158 | 9  | 37 | -19 | 37 | 4:23 | 99 | 41 |
| T.I.N.A. - Originally Performed by Fuse ODG feat. Angel   | Chart Nation            | Itunes/Ipod                      | spotify:track:4LgCPxyPE54MdOKcZTeHtE | 10/19/14 | 127 | 96 | 66 | -4  | 93 | 3:26 | 2  | 2  |
| Tainted Love                                              | Gloria Jones            | iPhone - Spotify                 | spotify:track:0BbA7S30mOQB94e4IBnqCt | 1/1/82   | 161 | 69 | 52 | -6  | 87 | 2:11 | 58 | 51 |
| Tainted Love                                              | Gloria Jones            | Spotify                          | spotify:track:0BbA7S30mOQB94e4IBnqCt | 1/1/82   | 161 | 69 | 52 | -6  | 87 | 2:11 | 58 | 51 |
| Take Her To The Moon                                      | Waterparks              | Phone                            | spotify:track:11y6CPvsQa57dxfdQ0y3CO | 11/2/16  | 125 | 81 | 57 | -4  | 71 | 3:15 | 1  | 34 |
| Take Me There                                             | Adore Delano            | iTunes playlist                  | spotify:track:1OicPC7MxR2qPePqvNRPx9 | 3/11/16  | 125 | 84 | 60 | -3  | 35 | 3:16 | 0  | 41 |
| Take Our Time                                             | TLC                     | iPhone/Music                     | spotify:track:44QrzYVAHFC9WMN91GEo9H | 11/15/94 | 142 | 56 | 65 | -9  | 35 | 4:34 | 0  | 50 |
| TALK ME DOWN                                              | Troye Sivan             | Windows music player on my phone | spotify:track:1othhMi2WsiF9oLoisJjYW | 12/9/15  | 174 | 78 | 36 | -7  | 35 | 3:57 | 15 | 61 |
| Tavas domas                                               | Jorspeis                | iPhone                           | spotify:track:0aVjQbQgmbRXUWHjV      | 6/18/12  | 160 | 65 | 27 | -5  | 50 | 3:17 | 44 | 1  |

|                            |                        |                     |                                                  |          |     |    |    |     |    |      |    |    |
|----------------------------|------------------------|---------------------|--------------------------------------------------|----------|-----|----|----|-----|----|------|----|----|
|                            |                        |                     | BH48x                                            |          |     |    |    |     |    |      |    |    |
| Tears in the Rain          | Triumph                | ipod Nano           | spotify:track:<br>4opZJswPga<br>1ZqItW19R<br>AST | 9/11/86  | 116 | 86 | 61 | -3  | 76 | 3:55 | 4  | 28 |
| Teenage Daughter           | D.I.D                  | Spotify             | spotify:track:<br>1O8F1vfeTf7<br>mxVtUhSx2<br>GD | 10/5/12  | 170 | 67 | 37 | -6  | 16 | 4:13 | 0  | 31 |
| Teenage Dirtbag            | Wheatus                | Amazon<br>Music App | spotify:track:<br>3LI4MmibTk<br>XH5cGpCG<br>Zgyw | 9/29/00  | 95  | 84 | 62 | -4  | 57 | 4:02 | 36 | 71 |
| Thank You For Saving<br>Me | Delirious?             | iTunes              | spotify:track:<br>32YJgZ5nZI<br>6n3FgeHJRa<br>U1 | 4/22/12  | 90  | 49 | 27 | -10 | 39 | 7:02 | 27 | 20 |
| That's Life                | Michael Bublé          | iPhone/<br>iTunes   | spotify:track:<br>7wgYqjzA3q<br>JLpyz89IIVP<br>A | 4/27/07  | 210 | 61 | 40 | -7  | 59 | 4:14 | 49 | 43 |
| That's What I Like         | Bruno Mars             | iPhone<br>6/Spotify | spotify:track:<br>0KKkJNfGy<br>hkQ5aFogxQ<br>APU | 11/17/16 | 134 | 56 | 85 | -5  | 86 | 3:27 | 1  | 86 |
| The Antidote               | Taylor McFerrin        | Laptop/Spo<br>tify  | spotify:track:<br>4Zd0w81zUn<br>8ZrGthaSc77<br>l | 6/9/14   | 134 | 75 | 54 | -9  | 41 | 3:06 | 12 | 32 |
| The Apology Song           | Gustavo<br>Santaolalla | Play Music          | spotify:track:<br>7nbb77c4fL<br>nosiTk5Qpx<br>Q  | 9/29/14  | 94  | 18 | 55 | -11 | 34 | 2:52 | 91 | 47 |
| The Bad Touch              | Bloodhound<br>Gang     | Spotify             | spotify:track:<br>5EYdTPdJD<br>74r9EVZBzt        | 1/1/00   | 123 | 74 | 84 | -6  | 97 | 4:21 | 0  | 68 |

|                                                                                               |                   |                                         |                                       |         |     |    |    |     |    |      |    |    |
|-----------------------------------------------------------------------------------------------|-------------------|-----------------------------------------|---------------------------------------|---------|-----|----|----|-----|----|------|----|----|
|                                                                                               |                   |                                         | qGG                                   |         |     |    |    |     |    |      |    |    |
| The Big Three Killed My Baby                                                                  | The White Stripes | Spotify                                 | spotify:track:3AI7BMmhc0NopWWrm pJPMa | 6/15/99 | 76  | 97 | 34 | -2  | 37 | 2:29 | 80 | 36 |
| The Birds                                                                                     | Telefon Tel Aviv  | Spotify                                 | spotify:track:4TwMjlyVd6FFqnJyGho73M  | 1/30/09 | 120 | 88 | 42 | -8  | 18 | 6:38 | 6  | 39 |
| The Brazilian Hipster - Digitally Remastered                                                  | Fort Knox Five    | Samsung smart phone / Samsung Music App | spotify:track:3sIVBXZR9GSluFtq5axSmG  | 4/30/13 | 105 | 69 | 89 | -7  | 67 | 4:01 | 23 | 49 |
| The Chaser                                                                                    | Twin Atlantic     | Spotify                                 | spotify:track:6KVLUjhqU7EqDFd2YqNNO   | 9/9/16  | 137 | 78 | 46 | -6  | 53 | 4:06 | 2  | 33 |
| The Cross Stands - Live                                                                       | Worship Central   | Spotify                                 | spotify:track:4SVWi4t0ox4kvznj4hnuBz  | 3/10/13 | 152 | 62 | 24 | -6  | 20 | 4:49 | 5  | 28 |
| The Cup of Life (The Official Song of the World Cup, France '98) - Remix - English Radio Edit | Ricky Martin      | iPhone music app                        | spotify:track:68CzXNGAMmb3k5MhLu0xVb  | 1/1/98  | 127 | 91 | 71 | -7  | 66 | 4:40 | 4  | 56 |
| The Drums (Din Daa Daa)                                                                       | Claptone          | iPhone 6s                               | spotify:track:3GxbXFWlq6Qseg4wHJ13qF  | 3/13/17 | 122 | 96 | 79 | -6  | 72 | 3:26 | 4  | 48 |
| The Eagle and the Hawk                                                                        | John Denver       | ipod                                    | spotify:track:4FU40U6YGW01k1U1lmlnDA  | 6/17/97 | 172 | 45 | 21 | -11 | 13 | 3:01 | 47 | 34 |

|                                            |                   |                                |                                       |          |     |    |    |     |    |      |    |    |
|--------------------------------------------|-------------------|--------------------------------|---------------------------------------|----------|-----|----|----|-----|----|------|----|----|
| The Fault Is in Our Stars [Lastufka Remix] | Meghan Tonjes     | Spotify                        | spotify:track:4NHoLJofNYr4Iv2FvLsZpp  | 8/17/12  | 95  | 68 | 61 | -8  | 28 | 4:23 | 3  | 4  |
| The Feeling                                | Justin Bieber     | Spotify                        | spotify:track:7vldwy3gdhmPRKWScI8H61  | 11/13/15 | 127 | 81 | 53 | -6  | 21 | 4:05 | 8  | 62 |
| The Feeling Begins                         | Peter Gabriel     | iPhone/Spotify                 | spotify:track:2VrAljZgqH EX5gP2aW0rpn | 5/1/15   | 114 | 51 | 59 | -20 | 16 | 3:57 | 10 | 39 |
| The Fox (What Does The Fox Say?)           | Ylvis             | Ipod                           | spotify:track:5HOpkTTVcmZHnthgyxrIL8  | 9/2/13   | 128 | 87 | 70 | -4  | 55 | 3:34 | 11 | 63 |
| The Greatest                               | Sia               | Spotify                        | spotify:track:7xHWNBFm6ObGEQPaUxHuKO  | 10/21/16 | 192 | 73 | 67 | -6  | 73 | 3:30 | 1  | 78 |
| The Hell of It                             | 1927              | iTunes                         | spotify:track:2ma5iFMKDfIn5wy1ldj5q4  | 8/9/13   | 100 | 84 | 56 | -5  | 62 | 5:13 | 1  | 11 |
| The Imitation Game                         | Alexandre Desplat | Youtube playlist I made myself | spotify:track:0o9ivTBX7mjTnaUYF4Gk6t  | 11/7/14  | 104 | 31 | 32 | -14 | 6  | 2:37 | 44 | 63 |
| The Judge                                  | Twenty One Pilots | Google play music              | spotify:track:1lguQJlNrI OoOylYVZN3M  | 5/15/15  | 83  | 80 | 42 | -5  | 59 | 4:58 | 18 | 73 |
| The Lines In My Hand                       | Opeth             | Spotify                        | spotify:track:0HkHMZNUw6NS61WW eO6N4X | 9/20/11  | 170 | 86 | 42 | -10 | 77 | 3:49 | 0  | 26 |

|                                          |                                         |                        |                                      |          |     |    |    |     |    |      |    |    |
|------------------------------------------|-----------------------------------------|------------------------|--------------------------------------|----------|-----|----|----|-----|----|------|----|----|
| The Love I Lost                          | Harold Melvin & The Blue Notes          | iPhone                 | spotify:track:3oI95UihdVu7uCiirC1DQA | 2/28/95  | 123 | 71 | 68 | -11 | 76 | 6:24 | 20 | 54 |
| The Music Of The Night                   | Andrew Lloyd Webber                     | iPod Nano 7            | spotify:track:2jF3AQzvTj9L1Ax9Di5BYu | 12/10/04 | 136 | 8  | 24 | -19 | 12 | 5:42 | 86 | 54 |
| The Next Step to Regaining Control       | empire! empire! (i was a lonely estate) | Ipod shuffle           | spotify:track:3Sa8QoQVIo3vQbFGis4yQO | 10/23/15 | 135 | 68 | 59 | -8  | 28 | 6:08 | 0  | 22 |
| The Oldest Of Sisters                    | Balthazar                               | Spotify                | spotify:track:6ggTEdkwzpCISGjsiYODEJ | 1/1/12   | 110 | 42 | 65 | -8  | 44 | 2:44 | 7  | 16 |
| The Pretender                            | Foo Fighters                            | iPhone                 | spotify:track:7x8dCjCr0x6x2lXKujYD34 | 9/25/07  | 173 | 96 | 43 | -4  | 37 | 4:29 | 0  | 77 |
| The Rest Is Noise                        | Jamie xx                                | iPhone 7 / Apple Music | spotify:track:7JjzVELpOxqsKP4jNcZXlA | 5/29/15  | 125 | 66 | 68 | -11 | 32 | 4:58 | 59 | 49 |
| The Riverboat Song                       | Ocean Colour Scene                      | Spotify                | spotify:track:1oPg2EYKf2hbS7aDyE8j3S | 1/1/01   | 106 | 86 | 48 | -6  | 61 | 4:59 | 1  | 52 |
| The Road                                 | We Are The Ocean                        | MP3                    | spotify:track:0oGq3MH2XsD1gDWRBzguRC | 1/1/12   | 153 | 97 | 38 | -5  | 35 | 3:41 | 0  | 21 |
| The Spiritual World                      | Manami Kiyota                           | Cell Phone             |                                      |          |     |    |    |     |    |      |    |    |
| The Story Of A Starry Night - Remastered | Glenn Miller                            | Amazon Music on mobile | spotify:track:20fpAGJ7V60nBJ1EyyfH   | 1/2/96   | 78  | 8  | 29 | -14 | 7  | 3:29 | 96 | 18 |

|                                                                        |                  |                     |                                       |          |     |    |    |     |    |      |    |    |
|------------------------------------------------------------------------|------------------|---------------------|---------------------------------------|----------|-----|----|----|-----|----|------|----|----|
|                                                                        |                  |                     | 3V                                    |          |     |    |    |     |    |      |    |    |
| The Way It Is                                                          | Bruce Hornsby    | iPhone / Music      | spotify:track:6V50MyHPGhEmwYu0Wdyf0t  | 6/2/86   | 111 | 69 | 58 | -12 | 53 | 4:58 | 61 | 68 |
| The Winner Takes It All                                                | ABBA             | iphone              | spotify:track:3oEkrIfXfSh9zGnE7eBzSV  | 1/1/80   | 126 | 79 | 45 | -7  | 52 | 4:55 | 57 | 67 |
| The Wire                                                               | HAIM             | Iphone              | spotify:track:7KdF7Zac5eC9jutk9Qret4  | 1/1/13   | 114 | 63 | 55 | -6  | 54 | 4:06 | 1  | 61 |
| The Wizard And I - From "Wicked" Original Broadway Cast Recording/2003 | Carole Shelley   | Spotify             | spotify:track:7d9AJSx5MwkUbl48K3ktuA  | 1/1/04   | 141 | 39 | 37 | -8  | 28 | 5:10 | 82 | 44 |
| The Word - Remastered 2009                                             | The Beatles      | Spotify             | spotify:track:4GBaPHvAyj4V2jeobD9tsy  | 12/3/65  | 121 | 64 | 59 | -10 | 79 | 2:43 | 1  | 52 |
| They Live in You                                                       | Samuel E. Wright | Spotify on my phone | spotify:track:1SDYD25CrItJZ5nFla2FxFQ | 1/1/97   | 115 | 26 | 57 | -15 | 11 | 3:04 | 85 | 45 |
| They Say It's Spring                                                   | Blossom Dearie   | Ipod                | spotify:track:0Gb98vV1mTekDNnUgeQ6x   | 11/4/15  | 111 | 3  | 59 | -21 | 40 | 3:46 | 93 | 50 |
| Thieves Like Us                                                        | New Order        | Spotify             | spotify:track:0kQTkXqjtWSPCM2D14cGq3  | 1/1/94   | 113 | 68 | 66 | -6  | 86 | 3:58 | 2  | 37 |
| Thinking About It - Radio Edit                                         | Just Kiddin      | Spotify / iPhone    | spotify:track:68kRRV5xUheCkKbk58Ii3j  | 10/12/14 | 120 | 84 | 69 | -6  | 30 | 2:53 | 2  | 57 |



|                                      |                                             |                   |                                      |         |     |    |    |     |    |      |    |    |
|--------------------------------------|---------------------------------------------|-------------------|--------------------------------------|---------|-----|----|----|-----|----|------|----|----|
| This Head I Hold                     | Electric Guest                              | Google play music | spotify:track:0LVaveDmmoMEKhBGhVhfoI | 4/23/12 | 162 | 87 | 66 | -5  | 96 | 2:56 | 3  | 54 |
| This Is Gospel                       | Panic! At The Disco                         | iTunes            | spotify:track:3yZQk5PC52CCmT4ZaTIKvv | 10/4/13 | 156 | 91 | 57 | -5  | 61 | 3:07 | 0  | 76 |
| This Love                            | Maroon 5                                    | ipod              | spotify:track:6ECp64rv50XVz93WvxXMGF | 1/1/02  | 95  | 86 | 71 | -5  | 76 | 3:26 | 6  | 74 |
| This Side Of Paradise                | Bryan Adams                                 | Spotify           | spotify:track:0V1QAinvloRgY3V6hV3ZO5 | 1/1/04  | 106 | 84 | 56 | -5  | 51 | 3:51 | 9  | 10 |
| Thomas Tallis 'O Nata Lux de Lumine' | Westminster Cathedral Choir/James O'Donnell | Ipad              |                                      |         |     |    |    |     |    |      |    |    |
| Tighten Up - Pt. 1                   | Archie Bell & The Drells                    | Spotify           | spotify:track:6IlcvtmuGpWlasqOpyGlyY | 1/1/68  | 125 | 44 | 71 | -13 | 72 | 3:16 | 24 | 46 |
| Til the Rivers All Run Dry           | The Karaoke Channel                         | iphone            | spotify:track:3UWWRLxRzUb7YDV5F7f05m | 6/8/15  | 117 | 27 | 64 | -17 | 48 | 3:49 | 53 | 0  |
| Time Is Running Out                  | Muse                                        | IPod              | spotify:track:2takcwOaAZWiXQijPHIx7B | 3/23/04 | 118 | 84 | 59 | -6  | 43 | 3:57 | 0  | 68 |
| Time Table                           | Kulwinder billa                             | Phone             | spotify:track:2XMHy3TSj4GUP0vZJXo2wB | 1/14/15 | 78  | 89 | 70 | -2  | 90 | 4:44 | 3  | 39 |

|                     |                                     |                    |                                                  |          |     |    |    |     |    |      |    |    |
|---------------------|-------------------------------------|--------------------|--------------------------------------------------|----------|-----|----|----|-----|----|------|----|----|
| Timeless            | James Blake                         | Spotify            | spotify:track:<br>49jxn2Mdde<br>8QZUx0Alb<br>D0l | 5/5/16   | 140 | 32 | 68 | -11 | 49 | 4:22 | 6  | 45 |
| Times Before        | Stockers!                           | Deezer             | spotify:track:<br>2HSVppoug7<br>B9jCZacEN5<br>7u | 1/1/12   | 147 | 62 | 37 | -5  | 21 | 4:16 | 0  | 9  |
| To Sir With Love    | Lulu                                | iPod nano          | spotify:track:<br>1C1dPegkqX<br>6HMoWcAY<br>5LWA | 12/29/67 | 97  | 34 | 55 | -11 | 33 | 2:46 | 39 | 46 |
| To The Moon         | Lena                                | iPhone             | spotify:track:<br>63bMfwaBfv<br>8vHIU1z3Hx<br>91 | 1/1/12   | 102 | 56 | 57 | -8  | 49 | 3:28 | 50 | 21 |
| Today and Every Day | Jackie Bond<br>and his<br>Orchestra | iTunes             |                                                  |          |     |    |    |     |    |      |    |    |
| Together            | CID                                 | Spotify/iPh<br>one | spotify:track:<br>6091uCm2ijb<br>vZRRuyA8P<br>7e | 5/6/16   | 126 | 98 | 63 | -2  | 22 | 3:09 | 1  | 44 |
| Tongue Tied         | Grouplove                           | Laptop/Spo<br>tify | spotify:track:<br>0GO8y8jQk1<br>PkHzS31d69<br>9N | 9/2/11   | 113 | 94 | 56 | -6  | 37 | 3:38 | 1  | 77 |
| Too Close           | Blue                                | iPod Touch         | spotify:track:<br>5JHbwrC8K<br>TnsxfKkWJx<br>09p | 1/1/01   | 102 | 76 | 79 | -3  | 74 | 3:47 | 1  | 41 |
| Torn                | Natalie<br>Imbruglia                | Iphone             | spotify:track:<br>3APayTEWi<br>UI9Ssep4BO<br>XR2 | 9/5/07   | 96  | 93 | 56 | -3  | 60 | 4:05 | 7  | 71 |
| Touch               | Little Mix                          | Spotify            | spotify:track:<br>6oG7bmUn7                      | 11/24/17 | 102 | 72 | 61 | -4  | 55 | 3:33 | 3  | 75 |

|                                                                                                                                            |                         |                   |                                                  |          |     |    |    |     |    |      |    |    |
|--------------------------------------------------------------------------------------------------------------------------------------------|-------------------------|-------------------|--------------------------------------------------|----------|-----|----|----|-----|----|------|----|----|
|                                                                                                                                            |                         |                   | ws0qYEJ0eE<br>beG                                |          |     |    |    |     |    |      |    |    |
| Touch                                                                                                                                      | Little Mix              | Spotify           | spotify:track:<br>6oG7bmUn7<br>ws0qYEJ0eE<br>beG | 11/24/17 | 102 | 72 | 61 | -4  | 55 | 3:33 | 3  | 75 |
| Touch                                                                                                                                      | Little Mix              | iTunes            | spotify:track:<br>6oG7bmUn7<br>ws0qYEJ0eE<br>beG | 11/24/17 | 102 | 72 | 61 | -4  | 55 | 3:33 | 3  | 75 |
| Touch The Sky                                                                                                                              | Hillsong United         | Spotify           | spotify:track:<br>5O2IEv11K4<br>Fa4KL8vO3e<br>6W | 5/26/15  | 83  | 43 | 23 | -9  | 21 | 4:22 | 26 | 61 |
| Trio for Piano,<br>Clarinet and Cello in<br>E-Flat Major, Op. 38<br>(After Septet Op. 20):<br>V. Scherzo. Allegro<br>molto e vivace – Trio | Ludwig van<br>Beethoven | iTunes            | spotify:track:<br>4JbRwIjNqJ<br>dZ2dEEUY6<br>G3e | 7/20/18  | 123 | 20 | 64 | -16 | 59 | 3:06 | 99 | 26 |
| Tripyra (Bonus Track)                                                                                                                      | Com Truise              | iTunes            | spotify:track:<br>7td01NrVI7<br>BzWSIrc8xw<br>Au | 1/25/11  | 164 | 50 | 76 | -10 | 48 | 2:03 | 12 | 24 |
| True Colors                                                                                                                                | Lily Juniper            | iPhone<br>Spotify | spotify:track:<br>6cURDHLik<br>2tSwj4oNjDk<br>eZ | 3/15/14  | 171 | 15 | 50 | -13 | 34 | 3:29 | 92 | 33 |
| Truly Madly Deeply                                                                                                                         | Savage Garden           | Youtube           | spotify:track:<br>69hwHdK14<br>Y1HusAut3<br>W6q  | 3/4/97   | 168 | 70 | 56 | -9  | 82 | 4:37 | 40 | 71 |
| Try A Little<br>Tenderness                                                                                                                 | The<br>Commitments      | Spotify           | spotify:track:<br>1gyrCSC99V<br>mnLkkZ08z<br>XMR | 1/1/91   | 111 | 39 | 37 | -13 | 10 | 4:33 | 1  | 43 |

|                                |                                  |                     |                                      |         |     |    |    |     |    |      |    |    |
|--------------------------------|----------------------------------|---------------------|--------------------------------------|---------|-----|----|----|-----|----|------|----|----|
| Tush - 2006 Remastered Version | ZZ Top                           | Ipod classic        | spotify:track:6zGDIDjfdKPyNxrEERO3XG | 4/18/75 | 145 | 89 | 58 | -5  | 79 | 2:18 | 10 | 64 |
| Twin Size Mattress             | The Front Bottoms                | Spotify             | spotify:track:4AQ4tIKGLXeBQQsybOKTmv | 6/2/13  | 145 | 87 | 32 | -6  | 40 | 4:25 | 1  | 48 |
| Two Can Play That Game         | Bobby Brown                      | Spotify on my phone | spotify:track:1gsnWXeNlbfoHpaGRi4oQ0 | 8/25/92 | 121 | 92 | 61 | -7  | 81 | 3:34 | 1  | 53 |
| Two Little Hitlers             | Elvis Costello & The Attractions | iTunes              | spotify:track:7MS9MwY1OH3S10Zo4qcF55 | 1/1/79  | 114 | 63 | 69 | -9  | 77 | 3:11 | 2  | 32 |
| U.N.I.                         | Ed Sheeran                       | Spotify             | spotify:track:5Ukzlujip1Slqka5OY82YS | 9/9/11  | 74  | 41 | 42 | -11 | 58 | 3:49 | 32 | 62 |
| U.N.I.                         | Ed Sheeran                       | Spotify             | spotify:track:5Ukzlujip1Slqka5OY82YS | 9/9/11  | 74  | 41 | 42 | -11 | 58 | 3:49 | 32 | 62 |
| Unconditionally                | Katy Perry                       | Spotify             | spotify:track:4fwbGKNExPtPHbor1TBSY4 | 1/1/13  | 129 | 73 | 40 | -5  | 36 | 3:49 | 0  | 72 |
| Under Cover Names              | Peter Hammill                    | iPod                | spotify:track:5i2Hq5E0Kv7xZq094HzDyz | 5/17/88 | 132 | 73 | 58 | -13 | 91 | 4:18 | 30 | 1  |
| Under Standing                 | Eric Lau                         | Spotify             | spotify:track:3zci9PSNoJQXEO7XtIjQR7 | 3/1/10  | 96  | 38 | 87 | -9  | 81 | 1:23 | 0  | 11 |

|                                           |                    |                                    |                                      |         |     |    |    |     |    |      |    |    |
|-------------------------------------------|--------------------|------------------------------------|--------------------------------------|---------|-----|----|----|-----|----|------|----|----|
| Unfinished Sympathy - 2012 Mix/Master     | Massive Attack     | Google play music on android phone | spotify:track:0j5FJJOmmnXPd0XajFWkMF | 6/10/91 | 114 | 84 | 59 | -8  | 70 | 5:08 | 4  | 60 |
| Unintended                                | Muse               | Spotify                            | spotify:track:6kyxQuFD38mo4S3urD2Wkw | 1/1/99  | 139 | 28 | 49 | -12 | 16 | 3:57 | 65 | 58 |
| Up (feat. Demi Lovato)                    | Olly Murs          | Iphone Music                       | spotify:track:3Sj8cecsigmHukuSILzDkg | 7/1/16  | 115 | 81 | 69 | -6  | 65 | 3:43 | 2  | 26 |
| Up All Night                              | ARTY               | Samsung S7                         | spotify:track:1tUiPKYOob0YbMdVRbr79w | 10/9/15 | 130 | 84 | 52 | -5  | 52 | 4:07 | 1  | 48 |
| Uprising                                  | Muse               | Mp3                                | spotify:track:4VqPOruhp5EdPBeR92t6lQ | 9/10/09 | 128 | 91 | 60 | -4  | 41 | 5:05 | 0  | 76 |
| Valerie ('58 Version)                     | Amy Winehouse      | iTunes                             |                                      |         |     |    |    |     |    |      |    |    |
| Valley                                    | Perfume Genius     | Spotify                            | spotify:track:0EScPNUSasv4VbXyLZKgSG | 5/5/17  | 100 | 25 | 75 | -9  | 44 | 3:10 | 81 | 53 |
| Vamp                                      | Graham Fitkin Band | iPod                               |                                      |         |     |    |    |     |    |      |    |    |
| Vicar In A Tutu - 2011 Remastered Version | The Smiths         | iPod                               | spotify:track:59cZGLKHgcYWd0z4fvtkE  | 1/1/86  | 125 | 88 | 50 | -7  | 81 | 2:24 | 0  | 45 |
| Video Games - Remastered                  | Lana Del Rey       | Music (IPhone)                     | spotify:track:0fBSs3fRoh1yJcne77fdu9 | 1/1/12  | 73  | 25 | 24 | -10 | 18 | 4:42 | 81 | 70 |

|                                                                           |                               |                                           |                                                  |          |     |    |    |     |    |      |    |    |
|---------------------------------------------------------------------------|-------------------------------|-------------------------------------------|--------------------------------------------------|----------|-----|----|----|-----|----|------|----|----|
| Vincent                                                                   | Don McLean                    | Spotify                                   | spotify:track:<br>0VNzEY1G4<br>GLqcNx5qaa<br>Tl6 | 1/1/71   | 92  | 9  | 42 | -19 | 46 | 4:03 | 91 | 64 |
| VinterNoll2                                                               | kent                          | Spotify                                   | spotify:track:<br>7sgGULtAhl<br>ts3SeZdou7p<br>y | 11/4/02  | 138 | 95 | 50 | -4  | 43 | 4:25 | 0  | 45 |
| Violin Concerto No.5<br>In A, K.219: 3.<br>Rondeau (Tempo di<br>minuetto) | Wolfgang<br>Amadeus<br>Mozart | Spotify                                   | spotify:track:<br>5UA4wgE9B<br>zWYw3pllK<br>CsO2 | 2/9/14   | 133 | 8  | 37 | -22 | 29 | 8:55 | 96 | 18 |
| Virtual Paradise                                                          | AK                            | Mobile<br>phone /<br>Google play<br>music | spotify:track:<br>1qukC9Q7L3<br>kBUBNrG3p<br>Yii | 11/17/15 | 174 | 83 | 59 | -5  | 4  | 3:30 | 65 | 42 |
| Voaria A Compostela                                                       | Milladoiro                    | Spotify                                   | spotify:track:<br>0TaiqzrFKJf<br>75f41rO3Zq<br>L | 1/1/05   | 90  | 14 | 47 | -18 | 30 | 3:59 | 81 | 5  |
| Wait For It                                                               | Leslie Odom Jr.               | Spotify                                   | spotify:track:<br>7EqpEBPOo<br>hgk7NnKvB<br>GFWo | 9/25/15  | 87  | 47 | 56 | -10 | 51 | 3:14 | 13 | 69 |
| Waiting for a Star to<br>Fall                                             | Boy Meets Girl                | Spotify                                   | spotify:track:<br>5suJZTE8Sp<br>SmR4zMqxL<br>g3V | 2/26/10  | 116 | 73 | 66 | -10 | 59 | 4:26 | 9  | 58 |
| Wake Me Up                                                                | Boyce Avenue                  | Spotify                                   | spotify:track:<br>7Dij8mBegb<br>8uhckk1TRJ<br>Uz | 4/28/15  | 100 | 21 | 45 | -10 | 37 | 3:24 | 84 | 53 |
| Wake Me up Before<br>You Go-Go                                            | Wham!                         | Sonos                                     | spotify:track:<br>0ikz6tENMO<br>NtK6qGkOr<br>U3c | 10/23/84 | 82  | 57 | 62 | -12 | 90 | 3:51 | 27 | 79 |

|                                                   |                        |                                 |                                                  |          |     |    |    |     |    |      |    |    |
|---------------------------------------------------|------------------------|---------------------------------|--------------------------------------------------|----------|-----|----|----|-----|----|------|----|----|
| Wake the Dead                                     | Comeback Kid           | iPod                            | spotify:track:<br>1i8IMyKJZx<br>7QypOnfyryt<br>u | 1/1/05   | 108 | 96 | 45 | -4  | 35 | 3:17 | 0  | 48 |
| Walking In Your<br>Footsteps -<br>Remastered 2003 | The Police             | Itunes                          | spotify:track:<br>0UD8XYV7r<br>mmrOHGhh<br>FQwkE | 6/1/83   | 197 | 53 | 61 | -15 | 95 | 3:36 | 92 | 36 |
| Wannabe - Radio Edit                              | Spice Girls            | Phone/Ama<br>zon Prime<br>Music | spotify:track:<br>1Je1IMUIBX<br>cx1Fz0WE7o<br>PT | 11/4/96  | 110 | 86 | 77 | -6  | 89 | 2:53 | 10 | 81 |
| Watch Me                                          | Tempest                | Sportify                        | spotify:track:<br>61Es9dnL8K<br>NMOFtxc6R<br>MWB | 6/24/16  | 75  | 98 | 69 | 0   | 32 | 3:12 | 1  | 6  |
| Waterbed                                          | The<br>Chainsmokers    | iPhone/Mus<br>ic App            | spotify:track:<br>5glABljb1lnJ<br>2zLl3RxQEI     | 10/23/15 | 105 | 87 | 61 | -7  | 17 | 3:30 | 0  | 55 |
| Waverley Steps                                    | Roddy<br>Woomble       | iPhone                          | spotify:track:<br>3fBnLBjhE0<br>elUfCI6GKO<br>ou | 1/1/06   | 157 | 54 | 29 | -5  | 15 | 4:08 | 9  | 17 |
| We Are Bulletproof<br>Pt.2                        | BTS                    | Spotify                         | spotify:track:<br>2Kspa0jD2M<br>SkaEdonf4C<br>nb | 6/12/13  | 144 | 95 | 75 | -5  | 87 | 3:45 | 1  | 68 |
| We Are Young (feat.<br>Janelle Monáe)             | fun.                   | Spotify                         | spotify:track:<br>5rgy6ghBq1e<br>RApCkeUdJ<br>Xf | 2/14/12  | 184 | 64 | 38 | -6  | 74 | 4:11 | 2  | 72 |
| We Care A Lot                                     | Faith No More          | Desktop                         | spotify:track:<br>2z1uVu3Ow<br>TmPlfqt5TW<br>k5k | 4/23/87  | 109 | 89 | 80 | -6  | 90 | 4:04 | 8  | 47 |
| We Dance (Live)                                   | Steffany<br>Gretzinger | Laptop                          | spotify:track:<br>2oq908qDm                      | 4/21/14  | 72  | 28 | 29 | -10 | 38 | 4:42 | 95 | 56 |

|                                |                 |                |                                                  |          |     |    |    |     |    |       |    |    |
|--------------------------------|-----------------|----------------|--------------------------------------------------|----------|-----|----|----|-----|----|-------|----|----|
|                                |                 |                | ARqhOlqVv<br>EUbJ                                |          |     |    |    |     |    |       |    |    |
| We Didn't Start the Fire       | Billy Joel      | iPhone/Spotify | spotify:track:<br>38bDGWuy<br>YdSdNfrFfb<br>CiVS | 10/2/01  | 145 | 97 | 71 | -5  | 89 | 4:48  | 8  | 60 |
| We Know The Way - From "Moana" | Opetai'a Foa'i  | ipod / iTunes  | spotify:track:<br>3JlqQyrjz3M<br>tZk2AK5V5<br>7u | 11/11/16 | 98  | 59 | 69 | -9  | 38 | 2:21  | 35 | 54 |
| What Do You Mean?              | Justin Bieber   | Spotify        | spotify:track:<br>3pzjHKrQsv<br>XGHQ98dx1<br>8HI | 11/13/15 | 125 | 57 | 85 | -8  | 79 | 3:26  | 59 | 76 |
| What Is Love                   | Haddaway        | ipod/ iTunes   | spotify:track:<br>2ahnofp2Lb<br>BWDXcJbM<br>aSTu | 1/1/93   | 124 | 77 | 68 | -8  | 74 | 4:30  | 2  | 72 |
| What's The Frequency, Kenneth? | R.E.M.          | Spotify        | spotify:track:<br>1yStBw3HI2<br>pnjbO3ihq33<br>N | 1/1/94   | 95  | 91 | 40 | -5  | 69 | 4:00  | 18 | 53 |
| When Adam Fell, Op. 89         | Alexander Goehr | iPod           | spotify:track:<br>3PoCrk4KhQ<br>hZVqm12a1<br>9hU | 2/5/13   | 116 | 3  | 29 | -25 | 4  | 15:27 | 98 | 9  |
| When I                         | DJ Zinc         | Spotify        | spotify:track:<br>4aDcXmuGJ<br>WeRdOpFf6<br>Rc0I | 12/21/16 | 127 | 93 | 76 | -4  | 66 | 4:04  | 1  | 38 |
| When The Sun Goes Down         | Arctic Monkeys  | iTunes         | spotify:track:<br>2zzLRQ78k<br>KfPTx8FJQ<br>CdC2 | 1/29/06  | 169 | 88 | 35 | -5  | 41 | 3:22  | 3  | 71 |
| When We Were On Fire           | James Bay       | Spotify        | spotify:track:<br>5mY6VWw<br>XebTz2ogby          | 3/23/15  | 114 | 81 | 69 | -5  | 75 | 3:58  | 0  | 47 |



|                                           |                      |                    |                                      |          |     |    |    |     |    |      |    |    |
|-------------------------------------------|----------------------|--------------------|--------------------------------------|----------|-----|----|----|-----|----|------|----|----|
|                                           |                      |                    | LOlhF                                |          |     |    |    |     |    |      |    |    |
| When We Were Young                        | Adele                | SPOTIFY            | spotify:track:0cj2joJcY6b4XSRfj2eZO1 | 11/20/15 | 144 | 60 | 38 | -6  | 26 | 4:51 | 30 | 75 |
| When Will My Life Begin? - From "Tangled" | Mandy Moore          | iTunes (on laptop) | spotify:track:4WOTwgkLN0puzCVg2WnV2N | 6/22/18  | 108 | 42 | 68 | -8  | 43 | 2:32 | 12 | 53 |
| Where Is Your Rider                       | The Oh Hellos        | Apple Music        | spotify:track:3kwDAannUD2Q7Z0bnPdXgO | 10/16/15 | 100 | 46 | 65 | -11 | 44 | 3:19 | 34 | 38 |
| Wherever You Will Go                      | The Calling          | Play Music         | spotify:track:2n6FX3Jcg4b4Leoz0GOqBF | 1/1/01   | 112 | 72 | 56 | -5  | 37 | 3:29 | 4  | 68 |
| Whipsnade                                 | Suede                | iTunes             | spotify:track:0os9ywgDJQ3Q10u46WwJeB | 10/6/97  | 113 | 72 | 55 | -9  | 48 | 4:22 | 64 | 15 |
| Whiskey, Whiskey, Whiskey                 | John Mayer           | iphone             | spotify:track:50YQFbfIVk2XMnVFKAuuib | 5/18/12  | 113 | 42 | 41 | -9  | 19 | 4:39 | 29 | 55 |
| Whiskey, Whiskey, Whiskey                 | John Mayer           | Itunes             | spotify:track:50YQFbfIVk2XMnVFKAuuib | 5/18/12  | 113 | 42 | 41 | -9  | 19 | 4:39 | 29 | 55 |
| White Lines                               | Danny Brown          | Iphone             | spotify:track:3fqfuK6PQITWU0fCKfo31d | 9/27/16  | 154 | 86 | 41 | -5  | 47 | 2:24 | 21 | 42 |
| White Waking                              | Les Rallizes Dénudés | Ipod Classic       | spotify:track:2d11DxWzz4L1D3Rk1Le    | 8/14/17  | 142 | 27 | 37 | -13 | 19 | 4:53 | 97 | 20 |

|                                              |                |                  |                                       |         |     |    |    |     |    |      |    |    |
|----------------------------------------------|----------------|------------------|---------------------------------------|---------|-----|----|----|-----|----|------|----|----|
|                                              |                |                  | DR0                                   |         |     |    |    |     |    |      |    |    |
| Whose Bed Have Your Boots Been Under? - Live | Shania Twain   | IPOD             | spotify:track:3CAjCIp6vqAYutYtyLtaSe  | 3/3/15  | 132 | 91 | 59 | -5  | 74 | 4:46 | 0  | 36 |
| Why'd You Only Call Me When You're High?     | Arctic Monkeys | Apple Music      | spotify:track:086myS9r57YsLbJpU0TgK9  | 9/9/13  | 92  | 63 | 69 | -6  | 80 | 2:41 | 5  | 75 |
| Winning                                      | The Sound      | Spotify on my PC | spotify:track:7EOCSmPvQ8psymuLTsKfN2  | 1/1/81  | 151 | 72 | 43 | -9  | 25 | 4:18 | 0  | 40 |
| Won't Be Afraid                              | The Cat Empire | Spotify          | spotify:track:1JREvL53b64WwKUBzZTgyq  | 1/1/07  | 88  | 79 | 63 | -5  | 97 | 4:11 | 5  | 27 |
| Wonder (Live) [Spontaneous]                  | Amanda Cook    | Spotify          | spotify:track:390Wrd097A2Fa15NzxukHa  | 4/21/14 | 148 | 27 | 21 | -10 | 8  | 6:32 | 38 | 52 |
| Wonderful World                              | James Morrison | Spotify          | spotify:track:2W2mN3qRAvF172TINdr71e  | 1/1/06  | 79  | 71 | 48 | -5  | 59 | 3:30 | 6  | 52 |
| Wonderland                                   | Taylor Swift   | Apple Music      | spotify:track:6RvRzl1YJTDnUvdOtV21IK  | 1/1/14  | 184 | 69 | 42 | -5  | 20 | 4:06 | 4  | 53 |
| Wonderwall                                   | Oasis          | Spotify          | spotify:track:79RUMZfMNMppqZnswovvTqv | 10/2/95 | 174 | 84 | 41 | -6  | 46 | 4:19 | 0  | 74 |
| World News                                   | Local Natives  | Spotify          | spotify:track:0yeCTb6RJGwWReSjq04     | 11/2/09 | 122 | 81 | 54 | -9  | 56 | 4:32 | 1  | 32 |

|                                       |                |          |                                                  |          |     |    |    |     |    |      |    |    |
|---------------------------------------|----------------|----------|--------------------------------------------------|----------|-----|----|----|-----|----|------|----|----|
|                                       |                |          | 0o1                                              |          |     |    |    |     |    |      |    |    |
| Worried About Ray                     | The Hoosiers   | Ipad     | spotify:track:<br>5WxDUKPT<br>u3SDBma67<br>yf3H5 | 10/22/07 | 174 | 81 | 49 | -4  | 60 | 2:47 | 0  | 49 |
| Wrapped Up                            | Olly Murs      | spotify  | spotify:track:<br>6nM9Sr6MP<br>cfpqwQTD7<br>PZGi | 11/21/14 | 122 | 85 | 79 | -5  | 95 | 3:06 | 9  | 64 |
| Wrecking Crew                         | To Kill A King | Spotify  | spotify:track:<br>7JWDwgUll<br>ZiVLeOdspK<br>F7c | 10/16/11 | 54  | 23 | 31 | -15 | 32 | 3:55 | 74 | 13 |
| Ya Veran                              | QUITAPENAS     | iPhone 6 | spotify:track:<br>5ayp2hoKsB<br>2nQiDb3hvS<br>0J | 3/31/17  | 133 | 84 | 65 | -8  | 72 | 3:36 | 12 | 21 |
| You & Me                              | Marc E. Bassy  | Spotify  | spotify:track:<br>7yCqehT9dK<br>ACTFy7Yug<br>P0J | 10/13/17 | 85  | 63 | 70 | -8  | 63 | 3:38 | 5  | 66 |
| You Are My Sunshine                   | Max Abrams     | Spotify  | spotify:track:<br>6qYS1thYj5j<br>vX0PeVii6e      | 2/26/14  | 116 | 27 | 66 | -11 | 56 | 2:58 | 35 | 1  |
| You Are So Beautiful                  | Jools Holland  | ipod     | spotify:track:<br>3oZXYW7e7<br>s0VzIAVmtY<br>VyN | 12/4/15  | 135 | 46 | 45 | -10 | 35 | 3:26 | 64 | 15 |
| You Can Call Me Al                    | Paul Simon     | Spotify  | spotify:track:<br>0qxYx4F3v<br>m1AOnfux6<br>dDxP | 8/12/86  | 128 | 76 | 78 | -8  | 82 | 4:40 | 18 | 73 |
| You Can't Always Get<br>What You Want | Band From TV   | Spotify  | spotify:track:<br>0OTi6ShQu7<br>1aE4Kh2uyw<br>wS | 1/1/07   | 176 | 62 | 55 | -7  | 67 | 4:24 | 15 | 28 |

|                                   |                      |                |                                                  |          |     |    |    |     |    |      |    |    |
|-----------------------------------|----------------------|----------------|--------------------------------------------------|----------|-----|----|----|-----|----|------|----|----|
| You Don't Know Love               | Olly Murs            | iPhone         | spotify:track:<br>3Iyzdie1LZ<br>W22Z9S2hIv<br>HI | 7/8/16   | 119 | 66 | 68 | -6  | 37 | 3:18 | 0  | 58 |
| You Don't Know Me -<br>Radio Edit | Jax Jones            | Apple<br>music | spotify:track:<br>1rFMYAZxB<br>oAKSzXI54b<br>rMu | 12/9/16  | 124 | 66 | 88 | -6  | 69 | 3:34 | 16 | 75 |
| You Give Love A Bad<br>Name       | Bon Jovi             | Spotify        | spotify:track:<br>3i17RhgJVzI<br>HoXVoqyby<br>Ys | 1/1/94   | 123 | 95 | 56 | -4  | 81 | 3:44 | 7  | 67 |
| You Wanna Freak Out               | My Morning<br>Jacket | Ipod           | spotify:track:<br>6QgC9zegBJ<br>Qc2dvZxLr3<br>eS | 6/6/11   | 153 | 87 | 43 | -7  | 79 | 3:20 | 1  | 21 |
| You, Visionen im<br>Spiegel       | Yuzuki               | iTunes         |                                                  |          |     |    |    |     |    |      |    |    |
| You'll Lose A Good<br>Thing       | Barbara Lynn         | iTunes         | spotify:track:<br>5CEREcGR5<br>WaLt40YzT<br>Q62e | 1/1/63   | 104 | 32 | 59 | -13 | 62 | 2:40 | 61 | 48 |
| You're Gorgeous                   | Babybird             | iPhone         | spotify:track:<br>0yJiIt4icur8t<br>xxfLRDJZK     | 7/16/04  | 124 | 69 | 57 | -7  | 26 | 3:42 | 24 | 52 |
| You're My Excuse to<br>Travel     | Baths                | iPod           | spotify:track:<br>1qhcb18f8G<br>MR4om9UIP<br>zIC | 7/6/10   | 95  | 82 | 50 | -6  | 38 | 3:35 | 21 | 30 |
| You're Welcome                    | Dwayne<br>Johnson    | Phone          | spotify:track:<br>6U4VqEHy4<br>n5VeiH4pQP<br>L24 | 11/18/16 | 135 | 75 | 78 | -7  | 69 | 2:44 | 28 | 76 |
| You're Dead To Me                 | Blitz Kids           | Spotify        | spotify:track:<br>0G9rkqGhyi<br>8BDGDYBx<br>3JvC | 1/1/12   | 170 | 96 | 34 | -6  | 38 | 3:50 | 0  | 5  |
